# Supplementary material
Source: PubMed Central journal article supplement (PMC5415415)
Supplement: NIHMS843993-supplement-7.pdf [file NIHMS843993-supplement-7.pdf]

NAME

BURTON\_ADIPOGENESIS\_6  
MOOTHA\_HUMAN\_MITODB\_6\_2002  
REACTOME\_FATTY\_ACID\_TRIACYLGLYCEROL\_AND\_KETONE\_BODY\_METABOLISM  
MOOTHA\_MITOCHONDRIA  
REACTOME\_METABOLISM\_OF\_LIPIDS\_AND\_LIPOPROTEINS  
MOOTHA\_FFA\_OXYDATION  
REACTOME\_TCA\_CYCLE\_AND\_RESPIRATORY\_ELECTRON\_TRANSPORT  
STEIN\_ESRRA\_TARGETS\_UP  
WONG\_MITOCHONDRIA\_GENE\_MODULE  
KEGG\_VALINE\_LEUCINE\_AND\_ISOLEUCINE\_DEGRADATION  
STEIN\_ESRRA\_TARGETS  
WAKABAYASHI\_ADIPOGENESIS\_PPARG\_RXRA\_BOUND\_8D  
KEGG\_FATTY\_ACID\_METABOLISM  
KEGG\_OXIDATIVE\_PHOSPHORYLATION  
KEGG\_PROPANOATE\_METABOLISM  
REACTOME\_RESPIRATORY\_ELECTRON\_TRANSPORT  
KAAB\_HEART\_ATRIUM\_VS\_VENTRICLE\_DN  
KEGG\_CITRATE\_CYCLE\_TCA\_CYCLE  
REACTOME\_RESPIRATORY\_ELECTRON\_TRANSPORT\_ATP\_SYNTHESIS\_BY\_CHEMIOSMOTIC\_COUPLING\_  
REACTOME\_PYRUVATE\_METABOLISM\_AND\_CITRIC\_ACID\_TCA\_CYCLE  
LANDIS\_ERBB2\_BREAST\_TUMORS\_324\_DN  
KEGG\_HUNTINGTONS\_DISEASE  
BURTON\_ADIPOGENESIS\_5  
MOOTHA\_VOXPPOS  
MOOTHA\_PGC  
WAKABAYASHI\_ADIPOGENESIS\_PPARG\_RXRA\_BOUND\_WITH\_H4K20ME1\_MARK  
KEGG\_ALZHEIMERS\_DISEASE  
KEGG\_PARKINSONS\_DISEASE  
FLECHNER\_BIOPSY\_KIDNEY\_TRANSPLANT\_REJECTED\_VS\_OK\_DN  
RUAN\_RESPONSE\_TO\_TNF\_DN  
WAKABAYASHI\_ADIPOGENESIS\_PPARG\_RXRA\_BOUND\_36HR  
MCBRYAN\_PUBERTAL\_BREAST\_4\_5WK\_DN  
BLALOCK\_ALZHEIMERS\_DISEASE\_DN  
KEGG\_PPAR\_SIGNALING\_PATHWAY  
LANDIS\_ERBB2\_BREAST\_PRENEOPLASTIC\_DN  
REACTOME\_CITRIC\_ACID\_CYCLE\_TCA\_CYCLE  
REACTOME\_TRIGLYCERIDE\_BIOSYNTHESIS  
KEGG\_PYRUVATE\_METABOLISM  
REACTOME\_BRANCHED\_CHAIN\_AMINO\_ACID\_CATABOLISM  
KEGG\_PEROXISOME  
CHIANG\_LIVER\_CANCER\_SUBCLASS\_PROLIFERATION\_DN

HSIAO\_LIVER\_SPECIFIC\_GENES  
REACTOME\_GLYCEROPHOSPHOLIPID\_BIOSYNTHESIS  
LANDIS\_ERBB2\_BREAST\_TUMORS\_65\_DN  
LEE\_LIVER\_CANCER\_DENA\_DN  
KEGG\_CARDIAC\_MUSCLE\_CONTRACTION  
YAO\_TEMPORAL\_RESPONSE\_TO\_PROGESTERONE\_CLUSTER\_13  
GERHOLD\_ADIPOGENESIS\_UP  
CAIRO\_LIVER\_DEVELOPMENT\_DN  
CAIRO\_HEPATOBLASTOMA\_DN  
ROME\_INSULIN\_TARGETS\_IN\_MUSCLE\_UP  
LANDIS\_BREAST\_CANCER\_PROGRESSION\_DN  
KEGG\_INSULIN\_SIGNALING\_PATHWAY  
STARK\_PREFRONTAL\_CORTEX\_22Q11\_DELETION\_DN  
LEE\_LIVER\_CANCER\_SURVIVAL\_UP  
HOSHIDA\_LIVER\_CANCER\_SUBCLASS\_S3  
BOYALT\_LIVER\_CANCER\_SUBCLASS\_G123\_DN  
NAKAMURA\_ADIPOGENESIS\_LATE\_UP  
KEEN\_RESPONSE\_TO\_ROSIGLITAZONE\_UP  
SHEN\_SMARCA2\_TARGETS\_UP  
WANG\_CLASSIC\_ADIPOGENIC\_TARGETS\_OF\_PPARG  
RUAN\_RESPONSE\_TO\_TROGLITAZONE\_UP  
REACTOME\_PPARA\_ACTIVATES\_GENE\_EXPRESSION  
KIM\_ALL\_DISORDERS\_OLIGODENDROCYTE\_NUMBER\_CORR\_UP  
NADLER\_OBESITY\_DN  
RODWELL\_AGING\_KIDNEY\_NO\_BLOOD\_DN  
REACTOME\_PHOSPHOLIPID\_METABOLISM  
STEGER\_ADIPOGENESIS\_UP  
RODWELL\_AGING\_KIDNEY\_DN  
CHIANG\_LIVER\_CANCER\_SUBCLASS\_CTNNB1\_UP  
KIM\_ALL\_DISORDERS\_CALB1\_CORR\_UP  
KEGG\_BUTANOATE\_METABOLISM  
DIAZ\_CHRONIC\_MEYLOGENOUS\_LEUKEMIA\_UP  
ACEVEDO\_LIVER\_CANCER\_DN  
WOO\_LIVER\_CANCER\_RECURRENCE\_DN  
BOCHKIS\_FOXA2\_TARGETS  
KEGG\_GLYCOLYSIS\_GLUONEOGENESIS  
PARENT\_MTOR\_SIGNALING\_UP  
KAYO\_CALORIE\_RESTRICTION\_MUSCLE\_DN  
CREIGHTON\_ENDOCRINE\_THERAPY\_RESISTANCE\_3  
ACEVEDO\_LIVER\_TUMOR\_VS\_NORMAL\_ADJACENT\_TISSUE\_DN  
REACTOME\_GLUCOSE\_METABOLISM  
HUMMERICH\_SKIN\_CANCER\_PROGRESSION\_DN

ACEVEDO\_NORMAL\_TISSUE\_ADJACENT\_TO\_LIVER\_TUMOR\_DN  
REACTOME\_METABOLISM\_OF\_AMINO\_ACIDS\_AND\_DERIVATIVES  
DELACROIX\_RAR\_BOUND\_ES  
KIM\_BIPOLAR\_DISORDER\_OLIGODENDROCYTE\_DENSITY\_CORR\_UP  
SHETH\_LIVER\_CANCER\_VS\_TXNIP\_LOSS\_PAM4  
RUAN\_RESPONSE\_TO\_TNF\_TROGLITAZONE\_DN  
KIM\_ALL\_DISORDERS\_DURATION\_CORR\_DN  
MARTINEZ\_TP53\_TARGETS\_UP  
DOANE\_RESPONSE\_TO\_ANDROGEN\_UP  
MARTINEZ\_RB1\_AND\_TP53\_TARGETS\_UP  
GRUETZMANN\_PANCREATIC\_CANCER\_DN  
LEE\_LIVER\_CANCER\_E2F1\_DN  
BERENJENO\_TRANSFORMED\_BY\_RHOA\_DN  
LE\_EGR2\_TARGETS\_DN  
NAKAYAMA\_SOFT\_TISSUE\_TUMORS\_PCA2\_DN  
WAKABAYASHI\_ADIPOGENESIS\_PPARG\_BOUND\_8D  
GOLDRATH\_HOMEOSTATIC\_PROLIFERATION  
BLALOCK\_ALZHEIMERS\_DISEASE\_INCIPIENT\_DN  
REACTOME\_METABOLISM\_OF\_CARBOHYDRATES  
BROWNE\_HCMV\_INFECTION\_48HR\_DN  
THUM\_SYSTOLIC\_HEART\_FAILURE\_DN  
HOSHIDA\_LIVER\_CANCER\_SURVIVAL\_DN  
NAKAMURA\_TUMOR\_ZONE\_PERIPHERAL\_VS\_CENTRAL\_DN  
MARTINEZ\_RB1\_TARGETS\_UP  
HILLION\_HMGA1B\_TARGETS  
SCHLOSSER\_MYC\_TARGETS\_REPRESSED\_BY\_SERUM  
YOSHIMURA\_MAPK8\_TARGETS\_DN  
SCHLOSSER\_SERUM\_RESPONSE\_DN  
REACTOME\_METABOLISM\_OF\_PROTEINS  
AGUIRRE\_PANCREATIC\_CANCER\_COPY\_NUMBER\_UP  
WAMUNYOKOLI\_OVARIAN\_CANCER\_LMP\_UP  
KIM\_MYC\_AMPLIFICATION\_TARGETS\_UP  
ZHOU\_INFLAMMATORY\_RESPONSE\_LIVE\_DN  
RAO\_BOUND\_BY\_SALL4  
YOSHIMURA\_MAPK8\_TARGETS\_UP  
SMID\_BREAST\_CANCER\_BASAL\_DN  
COULOUARN\_TEMPORAL\_TGFB1\_SIGNATURE\_DN  
IVANOVA\_HEMATOPOIESIS\_EARLY\_PROGENITOR  
LEE\_LIVER\_CANCER\_CIPROFIBRATE\_UP  
GERY\_CEBP\_TARGETS  
GOZGIT\_ESR1\_TARGETS\_UP  
GABRIELY\_MIR21\_TARGETS

KYNG\_DNA\_DAMAGE\_DN  
KARLSSON\_TGFB1\_TARGETS\_DN  
CAIRO\_HEPATOBLASTOMA\_UP  
CADWELL\_ATG16L1\_TARGETS\_UP  
KOYAMA\_SEMA3B\_TARGETS\_DN  
VANOEVELEN\_MYOGENESIS\_SIN3A\_TARGETS  
GRAESSMANN\_RESPONSE\_TO\_MC\_AND\_DOXORUBICIN\_UP  
WATANABE\_RECTAL\_CANCER\_RADIOOTHERAPY\_RESPONSIVE\_UP  
FARMER\_BREAST\_CANCER\_APOCRINE\_VS\_LUMINAL  
CHYLA\_CBFA2T3\_TARGETS\_DN  
YAO\_HOXA10\_TARGETS\_VIA\_PROGESTERONE\_UP  
HEDENFALK\_BREAST\_CANCER\_BRCA1\_VS\_BRCA2  
GRAESSMANN\_APOPTOSIS\_BY\_DOXORUBICIN\_UP  
MAHAJAN\_RESPONSE\_TO\_IL1A\_DN  
MCBRYAN\_PUBERTAL\_BREAST\_6\_7WK\_UP  
MILI\_PSEUDOPODIA\_HAPTOTAXIS\_UP  
PURBEY\_TARGETS\_OF\_CTBP1\_NOT\_SATB1\_UP  
DAIRKEE\_TERT\_TARGETS\_UP  
REACTOME\_INTEGRATION\_OF\_ENERGY\_METABOLISM  
MEISSNER\_NPC\_HCP\_WITH\_H3K4ME2  
URS\_ADIPOCYTE\_DIFFERENTIATION\_UP  
REACTOME\_BIOLOGICAL\_OXIDATIONS  
VERHAAK\_GLIOMASTOMA\_MESENCHYMAL  
FLECHNER\_BIOPSY\_KIDNEY\_TRANSPLANT\_OK\_VS\_DONOR\_UP  
DAZARD\_RESPONSE\_TO\_UV\_NHEK\_UP  
YANG\_BCL3\_TARGETS\_UP  
TAKAO\_RESPONSE\_TO\_UVB\_RADIATION\_UP  
SENGUPTA\_NASOPHARYNGEAL\_CARCINOMA\_WITH\_LMP1\_DN  
YAO\_TEMPORAL\_RESPONSE\_TO\_PROGESTERONE\_CLUSTER\_17  
RAY\_TUMORIGENESIS\_BY\_ERBB2\_CDC25A\_DN  
GOTZMANN\_EPITHELIAL\_TO\_MESENCHYMAL\_TRANSITION\_DN  
UEDA\_PERIFERAL\_CLOCK  
WANG\_SMARCE1\_TARGETS\_DN  
MIKKELSEN\_ES\_ICP\_WITH\_H3K4ME3  
SPIELMAN\_LYMPHOBLAST\_EUROPEAN\_VS\_ASIAN\_DN  
BASAKI\_YBX1\_TARGETS\_DN  
DAVICIONI\_MOLECULAR\_ARMS\_VS\_ERMS\_UP  
MCBRYAN\_PUBERTAL\_BREAST\_5\_6WK\_DN  
SHEPARD\_CRUSH\_AND\_BURN\_MUTANT\_UP  
LIM\_MAMMARY\_STEM\_CELL\_DN  
MOHANKUMAR\_TLX1\_TARGETS\_UP  
WEST\_ADRENOCORTICAL\_TUMOR\_DN

MONNIER\_POSTRADIATION\_TUMOR\_ESCAPE\_DN  
DITTMER\_PTHLH\_TARGETS\_UP  
ACEVEDO\_FGFR1\_TARGETS\_IN\_PROSTATE\_CANCER\_MODEL\_DN  
AFFAR\_YY1\_TARGETS\_UP  
LU\_AGING\_BRAIN\_UP  
JOHNSTONE\_PARVB\_TARGETS\_3\_UP  
LIM\_MAMMARY\_STEM\_CELL\_UP  
KAYO\_AGING\_MUSCLE\_DN  
OUELLET\_CULTURED\_OVARIAN\_CANCER\_INVASIVE\_VS\_LMP\_UP  
ONKEN\_UVEAL\_MELANOMA\_DN  
BUYTAERT\_PHOTODYNAMIC\_THERAPY\_STRESS\_UP  
DAVICIONI\_TARGETS\_OF\_PAX\_FOXO1\_FUSIONS\_UP  
OKUMURA\_INFLAMMATORY\_RESPONSE\_LPS  
BYSTRYKH\_HEMATOPOIESIS\_STEM\_CELL\_QTL\_CIS  
TONKS\_TARGETS\_OF\_RUNX1\_RUNX1T1\_FUSION\_MONOCYTE\_UP  
SMID\_BREAST\_CANCER\_LUMINAL\_A\_UP  
LIU\_PROSTATE\_CANCER\_DN  
DUTERTRE ESTRADIOL\_RESPONSE\_24HR\_DN  
GRAESSMANN\_APOPTOSIS\_BY\_DOXORUBICIN\_DN  
EBAUER\_TARGETS\_OF\_PAX3\_FOXO1\_FUSION\_UP  
RATTENBACHER\_BOUND\_BY\_CELF1  
HSIAO\_HOUSEKEEPING\_GENES  
FEVR\_CTNNB1\_TARGETS\_UP  
CHEMNITZ\_RESPONSE\_TO\_PROSTAGLANDIN\_E2\_DN  
DURAND\_STROMA\_MAX\_UP  
MIKKELSEN\_NPC\_ICP\_WITH\_H3K4ME3  
RUTELLA\_RESPONSE\_TO\_HGF\_UP  
GAZDA\_DIAMOND\_BLACKFAN\_ANEMIA\_ERYTHROID\_DN  
CREIGHTON\_ENDOCRINE\_THERAPY\_RESISTANCE\_4  
LEIN\_CHOROID\_PLEXUS\_MARKERS  
VECCHI\_GASTRIC\_CANCER\_EARLY\_DN  
JOHNSTONE\_PARVB\_TARGETS\_2\_DN  
RUTELLA\_RESPONSE\_TO\_HGF\_VS\_CSF2RB\_AND\_IL4\_UP  
GOBERT\_OLIGODENDROCYTE\_DIFFERENTIATION\_DN  
PENG\_RAPAMYCIN\_RESPONSE\_DN  
KRIGE\_RESPONSE\_TO\_TOSEDOSTAT\_24HR\_UP  
KAYO\_AGING\_MUSCLE\_UP  
MILI\_PSEUDOPODIA\_CHEMOTAXIS\_DN  
QI\_HYPOXIA  
CHANDRAN\_METASTASIS\_DN  
IWANAGA\_CARCINOGENESIS\_BY\_KRAS\_PTEN\_DN  
ALONSO\_METASTASIS\_UP

DELACROIX\_RARG\_BOUND\_MEF  
KRIGE\_RESPONSE\_TO\_TOSEDOSTAT\_24HR\_DN  
MULLIGHAN\_NPM1\_MUTATED\_SIGNATURE\_1\_UP  
PHONG\_TNF\_RESPONSE\_VIA\_P38\_COMPLETE  
FORTSCHEGGER\_PHF8\_TARGETS\_DN  
WANG\_MLL\_TARGETS  
RICKMAN\_METASTASIS\_UP  
ELVIDGE\_HYPOXIA\_UP  
BERTUCCI\_MEDULLARY\_VS\_DUCTAL\_BREAST\_CANCER\_DN  
LIU\_SOX4\_TARGETS\_DN  
ZHOU\_INFLAMMATORY\_RESPONSE\_FIMA\_DN  
KRIGE\_RESPONSE\_TO\_TOSEDOSTAT\_6HR\_UP  
MCBRYAN\_PUBERTAL\_BREAST\_5\_6WK\_UP  
LI\_WILMS\_TUMOR\_VS\_FETAL\_KIDNEY\_1\_UP  
BENPORATH\_MYC\_MAX\_TARGETS  
ELVIDGE\_HIF1A\_TARGETS\_DN  
GRAESSMANN\_APOPTOSIS\_BY\_SERUM\_DEPRIVATION\_DN  
LOCKWOOD\_AMPLIFIED\_IN\_LUNG\_CANCER  
IVANOVA\_HEMATOPOIESIS\_STEM\_CELL\_AND\_PROGENITOR  
DER\_IFN\_BETA\_RESPONSE\_UP  
CAIRO\_HEPATOBLASTOMA\_CLASSES\_DN  
WAMUNYOKOLI\_OVARIAN\_CANCER\_GRADES\_1\_2\_UP  
BOQUEST\_STEM\_CELL\_UP  
BENPORATH\_PRC2\_TARGETS  
ELVIDGE\_HIF1A\_AND\_HIF2A\_TARGETS\_DN  
LENAOUR\_DENDRITIC\_CELL\_MATURATION\_UP  
LU\_EZH2\_TARGETS\_UP  
PILON\_KLF1\_TARGETS\_UP  
LABBE\_TGFB1\_TARGETS\_DN  
ENK\_UV\_RESPONSE\_KERATINOCYTE\_UP  
JAATINEN\_HEMATOPOIETIC\_STEM\_CELL\_UP  
RAO\_BOUND\_BY\_SALL4\_ISOFORM\_A  
MIKKELSEN\_MEF\_HCP\_WITH\_H3K27ME3  
RUTELLA\_RESPONSE\_TO\_CSF2RB\_AND\_IL4\_DN  
ZHANG\_RESPONSE\_TO\_CANTHARIDIN\_DN  
BAKKER\_FOXO3\_TARGETS\_DN  
REACTOME\_TRANSMEMBRANE\_TRANSPORT\_OF\_SMALL\_MOLECULES  
RICKMAN\_TUMOR\_DIFFERENTIATED\_WELL\_VS\_POORLY\_UP  
BIDUS\_METASTASIS\_DN  
SMID\_BREAST\_CANCER\_LUMINAL\_B\_UP  
SERVITJA\_LIVER\_HNF1A\_TARGETS\_UP  
JIANG\_HYPOXIA\_NORMAL

ZWANG\_CLASS\_3\_TRANSIENTLY\_INDUCED\_BY\_EGF  
ODONNELL\_TFRC\_TARGETS\_UP  
CREIGHTON\_ENDOCRINE\_THERAPY\_RESISTANCE\_5  
CHIARADONNA\_NEOPLASTIC\_TRANSFORMATION\_CDC25\_DN  
KRIGE\_RESPONSE\_TO\_TOSEDOSTAT\_6HR\_DN  
ELVIDGE\_HYPOXIA\_BY\_DMOG\_UP  
DELYS\_THYROID\_CANCER\_DN  
LI\_AMPLIFIED\_IN\_LUNG\_CANCER  
ELVIDGE\_HYPOXIA\_DN  
LASTOWSKA\_NEUROBLASTOMA\_COPY\_NUMBER\_DN  
DODD\_NASOPHARYNGEAL\_CARCINOMA\_UP  
MULLIGHAN\_MLL\_SIGNATURE\_2\_DN  
PURBEY\_TARGETS\_OF\_CTBP1\_AND\_SATB1\_DN  
SHEDDEN\_LUNG\_CANCER\_GOOD\_SURVIVAL\_A4  
CHANG\_CORE\_SERUM\_RESPONSE\_DN  
FARMER\_BREAST\_CANCER\_APOCRINE\_VS\_BASAL  
LEE\_NEURAL\_CREST\_STEM\_CELL\_UP  
RODRIGUES\_THYROID\_CARCINOMA\_ANAPLASTIC\_DN  
LINDGREN\_BLADDER\_CANCER\_CLUSTER\_3\_DN  
BRUINS\_UVC\_RESPONSE\_VIA\_TP53\_GROUP\_B  
ONKEN\_UVEAL\_MELANOMA\_UP  
TONKS\_TARGETS\_OF\_RUNX1\_RUNX1T1\_FUSION\_ERYTHROCYTE\_UP  
IVANOVA\_HEMATOPOIESIS\_STEM\_CELL  
YAGI\_AML\_WITH\_INV\_16\_TRANSLOCATION  
ACEVEDO\_LIVER\_TUMOR\_VS\_NORMAL\_ADJACENT\_TISSUE\_UP  
HORIUCHI\_WTAP\_TARGETS\_UP  
LOPEZ\_MBD\_TARGETS  
YAO\_TEMPORAL\_RESPONSE\_TO\_PROGESTERONE\_CLUSTER\_9  
TORCHIA\_TARGETS\_OF\_EWSR1\_FLI1\_FUSION\_UP  
KYNG\_WERNER\_SYNDROM\_AND\_NORMAL\_AGING\_DN  
GAUSSMANN\_MLL\_AF4\_FUSION\_TARGETS\_G\_UP  
FULCHER\_INFLAMMATORY\_RESPONSE\_LLECTIN\_VS\_LPS\_DN  
BROWNE\_HCMV\_INFECTION\_20HR\_UP  
VANTVEER\_BREAST\_CANCER\_ESR1\_UP  
MOREAUX\_MULTIPLE\_MYELOMA\_BY\_TACI\_UP  
DOUGLAS\_BMI1\_TARGETS\_DN  
MCBRYAN\_PUBERTAL\_TGFB1\_TARGETS\_UP  
CASORELLI\_ACUTE\_PROMYELOCYTIC\_LEUKEMIA\_DN  
FERNANDEZ\_BOUND\_BY\_MYC  
KEGG\_Glutathione\_Metabolism  
NING\_CHRONIC\_OBSTRUCTIVE\_PULMONARY\_DISEASE\_DN  
WINTER\_HYPOXIA\_METAGENE

PLASARI\_TGFB1\_TARGETS\_10HR\_DN  
SATO\_SILENCED\_BY\_METHYLATION\_IN\_PANCREATIC\_CANCER\_1  
BONOME\_OVARIAN\_CANCER\_SURVIVAL\_OPTIMAL\_DEBULKING  
IGLESIAS\_E2F\_TARGETS\_UP  
XU\_GH1\_AUTOCRINE\_TARGETS\_DN  
PEDERSEN\_METASTASIS\_BY\_ERBB2\_ISOFORM\_7  
RHEIN\_ALL\_GLUCOCORTICOID\_THERAPY\_DN  
POTTI\_TOPOTECAN\_SENSITIVITY  
KONDO\_EZH2\_TARGETS  
ELVIDGE\_HYPOXIA\_BY\_DMOG\_DN  
TURASHVILI\_BREAST\_DUCTAL\_CARCINOMA\_VS\_DUCTAL\_NORMAL\_DN  
FOSTER\_KDM1A\_TARGETS\_DN  
MEISSNER\_NPC\_HCP\_WITH\_H3\_UNMETHYLATED  
REACTOME\_DEVELOPMENTAL\_BIOLOGY  
BANDRES\_RESPONSE\_TO\_CARMUSTIN\_MGMT\_48HR\_DN  
BOQUEST\_STEM\_CELL\_CULTURED\_VS\_FRESH\_UP  
CASORELLI\_ACUTE\_PROMYELOCYTIC\_LEUKEMIA\_UP  
ENK\_UV\_RESPONSE\_KERATINOCYTE\_DN  
FORTSCHEGGER\_PHF8\_TARGETS\_UP  
SCHAEFFER\_PROSTATE\_DEVELOPMENT\_6HR\_UP  
BENPORATH\_SUZ12\_TARGETS  
MARTINEZ\_RB1\_TARGETS\_DN  
WEI\_MIR34A\_TARGETS  
BROWNE\_HCMV\_INFECTION\_18HR\_DN  
BYSTRYKH\_HEMATOPOIESIS\_STEM\_CELL\_AND\_BRAIN\_QTL\_TRANS  
WELCSH\_BRCA1\_TARGETS\_UP  
BENPORATH\_ES\_WITH\_H3K27ME3  
MIYAGAWA\_TARGETS\_OF\_EWSR1\_ETS\_FUSIONS\_DN  
TSENG\_IRS1\_TARGETS\_DN  
TAKEDA\_TARGETS\_OF\_NUP98\_HOXA9\_FUSION\_10D\_DN  
ZWANG\_TRANSIENTLY\_UP\_BY\_1ST\_EGF\_PULSE\_ONLY  
BROWNE\_HCMV\_INFECTION\_1HR\_DN  
MCCLUNG\_CREB1\_TARGETS\_UP  
YEGNASUBRAMANIAN\_PROSTATE\_CANCER  
SCHAEFFER\_PROSTATE\_DEVELOPMENT\_12HR\_UP  
LIU\_CMYB\_TARGETS\_UP  
BRUINS\_UVC\_RESPONSE\_EARLY\_LATE  
WEI\_MYCN\_TARGETS\_WITH\_E\_BOX  
GRAESSMANN\_APOPTOSIS\_BY\_SERUM\_DEPRIVATION\_UP  
RAO\_BOUND\_BY\_SALL4\_ISOFORM\_B  
KEGG\_LYSOSOME  
CHIARADONNA NEOPLASTIC\_TRANSFORMATION\_KRAS\_DN



LINDGREN\_BLADDER\_CANCER\_CLUSTER\_2A\_DN  
SESTO\_RESPONSE\_TO\_UV\_C8  
MASSARWEH\_TAMOXIFEN\_RESISTANCE\_UP  
FULCHER\_INFLAMMATORY\_RESPONSE\_LECTIN\_VS\_LPS\_UP  
ZHANG\_TLX\_TARGETS\_60HR\_UP  
KIM\_WT1\_TARGETS\_8HR\_DN  
BONOME\_OVARIAN\_CANCER\_SURVIVAL\_SUBOPTIMAL\_DEBULKING  
FOSTER\_TOLERANT\_MACROPHAGE\_UP  
SWEET\_LUNG\_CANCER\_KRAS\_DN  
ZWANG\_TRANSIENTLY\_UP\_BY\_2ND\_EGF\_PULSE\_ONLY  
DANG\_BOUND\_BY\_MYC  
FARMER\_BREAST\_CANCER\_BASAL\_VS\_LUTALIN  
GAUSSMANN\_MLL\_AF4\_FUSION\_TARGETS\_F\_UP  
TAKEDA\_TARGETS\_OF\_NUP98\_HOXA9\_FUSION\_3D\_UP  
SENESE\_HDAC1\_TARGETS\_DN  
YAO\_TEMPORAL\_RESPONSE\_TO\_PROGESTERONE\_CLUSTER\_6  
BRUINS\_UVC\_RESPONSE\_LATE  
ACEVEDO\_METHYLATED\_IN\_LIVER\_CANCER\_DN  
RUTELLA\_RESPONSE\_TO\_CSF2RB\_AND\_IL4\_UP  
OUELLET\_OVARIAN\_CANCER\_INVASIVE\_VS\_LMP\_UP  
KATSANOUELAVL1\_TARGETS\_DN  
YAO\_TEMPORAL\_RESPONSE\_TO\_PROGESTERONE\_CLUSTER\_12  
ACEVEDO\_LIVER\_CANCER\_UP  
RIGGINS\_TAMOXIFEN\_RESISTANCE\_DN  
DURAND\_STROMA\_MAX\_DN  
BOUDOUKHA\_BOUND\_BY\_IGF2BP2  
WESTON\_VEGFA\_TARGETS  
HAN\_SATB1\_TARGETS\_UP  
BENPORATH\_SOX2\_TARGETS  
KYNG\_DNA\_DAMAGE\_UP  
REN\_ALVEOLAR\_RHABDOMYOSARCOMA\_DN  
SANSOM\_APC\_TARGETS\_DN  
CHIANG\_LIVER\_CANCER\_SUBCLASS\_UNANNOTATED\_DN  
MULLIGHAN\_MLL\_SIGNATURE\_1\_DN  
KAYO\_CALORIE\_RESTRICTION\_MUSCLE\_UP  
OSMAN\_BLADDER\_CANCER\_UP  
AMUNDSON\_RESPONSE\_TO\_ARSENITE  
MARTENS\_TRETINOIN\_RESPONSE\_UP  
REACTOME\_NGF\_SIGNALLING\_VIA\_TRKA\_FROM\_THE\_PLASMA\_MEMBRANE  
OSWALD\_HEMATOPOIETIC\_STEM\_CELL\_IN\_COLLAGEN\_GEL\_DN  
DURCHDEWALD\_SKIN\_CARCINOGENESIS\_DN  
WANG\_TUMOR\_INVASIVENESS\_UP

GROSS\_HYPOXIA\_VIA\_ELK3\_AND\_HIF1A\_UP  
PID\_HIF1\_TFPATHWAY  
MULLIGHAN\_NPM1\_SIGNATURE\_3\_UP  
BYSTRYKH\_HEMATOPOIESIS\_STEM\_CELL\_QTL\_TRANS  
MCCABE\_BOUND\_BY\_HOXC6  
STARK\_PREFRONTAL\_CORTEX\_22Q11\_DELETION\_UP  
TIEN\_INTESTINE\_PROBIOTICS\_6HR\_DN  
PEDRIOLI\_MIR31\_TARGETS\_DN  
BROWN\_MYELOID\_CELL\_DEVELOPMENT\_UP  
VANDESLUIS\_COMMD1\_TARGETS\_GROUP\_3\_UP  
DACOSTA\_UV\_RESPONSE\_VIA\_ERCC3\_UP  
LEE\_BMP2\_TARGETS\_UP  
WANG\_SMARCE1\_TARGETS\_UP  
HOLLMANN\_APOPTOSIS\_VIA\_CD40\_DN  
HATADA\_METHYLATED\_IN\_LUNG\_CANCER\_UP  
ZHANG\_TLX\_TARGETS\_36HR\_UP  
DOUGLAS\_BMI1\_TARGETS\_UP  
SCHAEFFER\_PROSTATE\_DEVELOPMENT\_48HR\_UP  
ENK\_UV\_RESPONSE\_EPIDERMIS\_DN  
ENK\_UV\_RESPONSE\_EPIDERMIS\_UP  
YAMAZAKI\_TCEB3\_TARGETS\_DN  
WANG\_CISPLATIN\_RESPONSE\_AND\_XPC\_DN  
MARTORIATI\_MDM4\_TARGETS\_FETAL\_LIVER\_UP  
SMITH\_TERT\_TARGETS\_DN  
DAVICIONI\_MOLECULAR\_ARMS\_VS\_ERMS\_DN  
SANSOM\_APC\_MYC\_TARGETS  
WANG\_LMO4\_TARGETS\_UP  
NING\_CHRONIC\_OBSTRUCTIVE\_PULMONARY\_DISEASE\_UP  
TOOKER\_GEMCITABINE\_RESISTANCE\_DN  
LIU\_SOX4\_TARGETS\_UP  
WANG\_CLIM2\_TARGETS\_UP  
LU\_EZH2\_TARGETS\_DN  
LEE\_RECENT\_THYMIC\_EMIGRANT  
MARTORIATI\_MDM4\_TARGETS\_NEUROEPITHELIUM\_UP  
GARY\_CD5\_TARGETS\_UP  
MITSIADES\_RESPONSE\_TO\_APLIDIN\_UP  
REACTOME\_SIGNALLING\_BY\_NGF  
IVANOVA\_HEMATOPOIESIS\_MATURE\_CELL  
BAELDE\_DIABETIC\_NEPHROPATHY\_DN  
BHAT\_ESR1\_TARGETS\_VIA\_AKT1\_UP  
RODRIGUES\_THYROID\_CARCINOMA\_POORLY\_DIFFERENTIATED\_DN  
REACTOME\_SLC\_MEDIATED\_TRANSMEMBRANE\_TRANSPORT

RUIZ\_TNC\_TARGETS\_UP  
SENGUPTA\_NASOPHARYNGEAL\_CARCIOMA\_WITH\_LMP1\_UP  
RIGGI\_EWING\_SARCOMA\_PROGENITOR\_UP  
CONCANNON\_APOPTOSIS\_BY\_EPOXOMICIN\_UP  
KOYAMA\_SEMA3B\_TARGETS\_UP  
TAKEDA\_TARGETS\_OF\_NUP98\_HOXA9\_FUSION\_8D\_DN  
VERHAAK\_GLIOMASTOMA\_CLASSICAL  
NUYTTEN\_NIPP1\_TARGETS\_UP  
MCBRYAN\_PUBERTAL\_BREAST\_3\_4WK\_UP  
PEREZ\_TP63\_TARGETS  
HUTTMANN\_B\_CLL\_POOR\_SURVIVAL\_UP  
JAEGER\_METASTASIS\_DN  
DEBIASI\_APOPTOSIS\_BY\_REOVIRUS\_INFECTIION\_UP  
MEISSNER\_NPC\_HCP\_WITH\_H3K4ME2\_AND\_H3K27ME3  
FOSTER\_KDM1A\_TARGETS\_UP  
SWEET\_LUNG\_CANCER\_KRAS\_UP  
DARWICHE\_PAPILLOMA\_RISK\_LOW\_UP  
ACEVEDO\_LIVER\_CANCER\_WITH\_H3K27ME3\_UP  
LASTOWSKA\_NEUROBLASTOMA\_COPY\_NUMBER\_UP  
PEREZ\_TP53\_TARGETS  
SARRIO\_EPITHELIAL\_MESENCHYMAL\_TRANSITION\_DN  
GRAESSMANN\_RESPONSE\_TO\_MC\_AND\_DOXORUBICIN\_DN  
MONNIER\_POSTRADIATION\_TUMOR\_ESCAPE\_UP  
CUI\_TCF21\_TARGETS\_2\_DN  
IVANOVA\_HEMATOPOIESIS\_STEM\_CELL\_LONG\_TERM  
DARWICHE\_SQUAMOUS\_CELL\_CARCIOMA\_UP  
WAMUNYOKOLI\_OVARIAN\_CANCER\_LMP\_DN  
GAVIN\_FOXP3\_TARGETS\_CLUSTER\_T7  
VECCHI\_GASTRIC\_CANCER\_ADVANCED\_VS\_EARLY\_UP  
ALFANO\_MYC\_TARGETS  
DARWICHE\_PAPILLOMA\_RISK\_HIGH\_UP

GS<br> follow link to MSigDB

BURTON\_ADIPOGENESIS\_6

MOOTHA\_HUMAN\_MITODB\_6\_2002

REACTOME\_FATTY\_ACID\_TRIACYLGLYCEROL\_AND\_KETONE\_BODY\_METABOLISM

MOOTHA\_MITOCHONDRIA

REACTOME\_METABOLISM\_OF\_LIPIDS\_AND\_LIPOPROTEINS

MOOTHA\_FFA\_OXYDATION

REACTOME\_TCA\_CYCLE\_AND\_RESPIRATORY\_ELECTRON\_TRANSPORT

STEIN\_ESRRA\_TARGETS\_UP

WONG\_MITOCHONDRIA\_GENE\_MODULE

KEGG\_VALINE\_LEUCINE\_AND\_ISOLEUCINE\_DEGRADATION

STEIN\_ESRRA\_TARGETS

WAKABAYASHI\_ADIPOGENESIS\_PPARG\_RXRA\_BOUND\_8D

KEGG\_FATTY\_ACID\_METABOLISM

KEGG\_OXIDATIVE\_PHOSPHORYLATION

KEGG\_PROPANOATE\_METABOLISM

REACTOME\_RESPIRATORY\_ELECTRON\_TRANSPORT

KAAB\_HEART\_ATRIUM\_VS\_VENTRICLE\_DN

KEGG\_CITRATE\_CYCLE\_TCA\_CYCLE

REACTOME\_RESPIRATORY\_ELECTRON\_TRANSPORT\_ATP\_SYNTHESIS\_BY\_CHEMIOSMOTIC\_COUPLING\_

REACTOME\_PYRUVATE\_METABOLISM\_AND\_CITRIC\_ACID\_TCA\_CYCLE

LANDIS\_ERBB2\_BREAST\_TUMORS\_324\_DN

KEGG\_HUNTINGTONS\_DISEASE

BURTON\_ADIPOGENESIS\_5

MOOTHA\_VOXPPOS

MOOTHA\_PGC

WAKABAYASHI\_ADIPOGENESIS\_PPARG\_RXRA\_BOUND\_WITH\_H4K20ME1\_MARK

KEGG\_ALZHEIMERS\_DISEASE

KEGG\_PARKINSONS\_DISEASE

FLECHNER\_BIOPSY\_KIDNEY\_TRANSPLANT\_REJECTED\_VS\_OK\_DN

RUAN\_RESPONSE\_TO\_TNF\_DN

WAKABAYASHI\_ADIPOGENESIS\_PPARG\_RXRA\_BOUND\_36HR

MCBRYAN\_PUBERTAL\_BREAST\_4\_5WK\_DN

BLALOCK\_ALZHEIMERS\_DISEASE\_DN

KEGG\_PPAR\_SIGNALING\_PATHWAY

LANDIS\_ERBB2\_BREAST\_PRENEOPLASTIC\_DN

REACTOME\_CITRIC\_ACID\_CYCLE\_TCA\_CYCLE

REACTOME\_TRIGLYCERIDE\_BIOSYNTHESIS

KEGG\_PYRUVATE\_METABOLISM

REACTOME\_BRANCHED\_CHAIN\_AMINO\_ACID\_CATABOLISM

KEGG\_PEROXISOME

CHIANG\_LIVER\_CANCER\_SUBCLASS\_PROLIFERATION\_DN

HSIAO\_LIVER\_SPECIFIC\_GENES  
REACTOME\_GLYCEROPHOSPHOLIPID\_BIOSYNTHESIS  
LANDIS\_ERBB2\_BREAST\_TUMORS\_65\_DN  
LEE\_LIVER\_CANCER\_DENA\_DN  
KEGG\_CARDIAC\_MUSCLE\_CONTRACTION  
YAO\_TEMPORAL\_RESPONSE\_TO\_PROGESTERONE\_CLUSTER\_13  
GERHOLD\_ADIPOGENESIS\_UP  
CAIRO\_LIVER\_DEVELOPMENT\_DN  
CAIRO\_HEPATOBLASTOMA\_DN  
ROME\_INSULIN\_TARGETS\_IN\_MUSCLE\_UP  
LANDIS\_BREAST\_CANCER\_PROGRESSION\_DN  
KEGG\_INSULIN\_SIGNALING\_PATHWAY  
STARK\_PREFRONTAL\_CORTEX\_22Q11\_DELETION\_DN  
LEE\_LIVER\_CANCER\_SURVIVAL\_UP  
HOSHIDA\_LIVER\_CANCER\_SUBCLASS\_S3  
BOYALT\_LIVER\_CANCER\_SUBCLASS\_G123\_DN  
NAKAMURA\_ADIPOGENESIS\_LATE\_UP  
KEEN\_RESPONSE\_TO\_ROSIGLITAZONE\_UP  
SHEN\_SMARCA2\_TARGETS\_UP  
WANG\_CLASSIC\_ADIPOGENIC\_TARGETS\_OF\_PPARG  
RUAN\_RESPONSE\_TO\_TROGLITAZONE\_UP  
REACTOME\_PPARA\_ACTIVATES\_GENE\_EXPRESSION  
KIM\_ALL\_DISORDERS\_OLIGODENDROCYTE\_NUMBER\_CORR\_UP  
NADLER\_OBESITY\_DN  
RODWELL\_AGING\_KIDNEY\_NO\_BLOOD\_DN  
REACTOME\_PHOSPHOLIPID\_METABOLISM  
STEGER\_ADIPOGENESIS\_UP  
RODWELL\_AGING\_KIDNEY\_DN  
CHIANG\_LIVER\_CANCER\_SUBCLASS\_CTNNB1\_UP  
KIM\_ALL\_DISORDERS\_CALB1\_CORR\_UP  
KEGG\_BUTANOATE\_METABOLISM  
DIAZ\_CHRONIC\_MEYLOGENOUS\_LEUKEMIA\_UP  
ACEVEDO\_LIVER\_CANCER\_DN  
WOO\_LIVER\_CANCER\_RECURRENCE\_DN  
BOCHKIS\_FOXA2\_TARGETS  
KEGG\_GLYCOLYSIS\_GLUONEOGENESIS  
PARENT\_MTOR\_SIGNALING\_UP  
KAYO\_CALORIE\_RESTRICTION\_MUSCLE\_DN  
CREIGHTON\_ENDOCRINE\_THERAPY\_RESISTANCE\_3  
ACEVEDO\_LIVER\_TUMOR\_VS\_NORMAL\_ADJACENT\_TISSUE\_DN  
REACTOME\_GLUCOSE\_METABOLISM  
HUMMERICH\_SKIN\_CANCER\_PROGRESSION\_DN

ACEVEDO\_NORMAL\_TISSUE\_ADJACENT\_TO\_LIVER\_TUMOR\_DN  
REACTOME\_METABOLISM\_OF\_AMINO\_ACIDS\_AND\_DERIVATIVES  
DELACROIX\_RAR\_BOUND\_ES  
KIM\_BIPOLAR\_DISORDER\_OLIGODENDROCYTE\_DENSITY\_CORR\_UP  
SHETH\_LIVER\_CANCER\_VS\_TXNIP\_LOSS\_PAM4  
RUAN\_RESPONSE\_TO\_TNF\_TROGLITAZONE\_DN  
KIM\_ALL\_DISORDERS\_DURATION\_CORR\_DN  
MARTINEZ\_TP53\_TARGETS\_UP  
DOANE\_RESPONSE\_TO\_ANDROGEN\_UP  
MARTINEZ\_RB1\_AND\_TP53\_TARGETS\_UP  
GRUETZMANN\_PANCREATIC\_CANCER\_DN  
LEE\_LIVER\_CANCER\_E2F1\_DN  
BERENJENO\_TRANSFORMED\_BY\_RHOA\_DN  
LE\_EGR2\_TARGETS\_DN  
NAKAYAMA\_SOFT\_TISSUE\_TUMORS\_PCA2\_DN  
WAKABAYASHI\_ADIPOGENESIS\_PPARG\_BOUND\_8D  
GOLDRATH\_HOMEOSTATIC\_PROLIFERATION  
BLALOCK\_ALZHEIMERS\_DISEASE\_INCIPIENT\_DN  
REACTOME\_METABOLISM\_OF\_CARBOHYDRATES  
BROWNE\_HCMV\_INFECTION\_48HR\_DN  
THUM\_SYSTOLIC\_HEART\_FAILURE\_DN  
HOSHIDA\_LIVER\_CANCER\_SURVIVAL\_DN  
NAKAMURA\_TUMOR\_ZONE\_PERIPHERAL\_VS\_CENTRAL\_DN  
MARTINEZ\_RB1\_TARGETS\_UP  
HILLION\_HMGA1B\_TARGETS  
SCHLOSSER\_MYC\_TARGETS\_REPRESSED\_BY\_SERUM  
YOSHIMURA\_MAPK8\_TARGETS\_DN  
SCHLOSSER\_SERUM\_RESPONSE\_DN  
REACTOME\_METABOLISM\_OF\_PROTEINS  
AGUIRRE\_PANCREATIC\_CANCER\_COPY\_NUMBER\_UP  
WAMUNYOKOLI\_OVARIAN\_CANCER\_LMP\_UP  
KIM\_MYC\_AMPLIFICATION\_TARGETS\_UP  
ZHOU\_INFLAMMATORY\_RESPONSE\_LIVE\_DN  
RAO\_BOUND\_BY\_SALL4  
YOSHIMURA\_MAPK8\_TARGETS\_UP  
SMID\_BREAST\_CANCER\_BASAL\_DN  
COULOUARN\_TEMPORAL\_TGFB1\_SIGNATURE\_DN  
IVANOVA\_HEMATOPOIESIS\_EARLY\_PROGENITOR  
LEE\_LIVER\_CANCER\_CIPROFIBRATE\_UP  
GERY\_CEBP\_TARGETS  
GOZGIT\_ESR1\_TARGETS\_UP  
GABRIELY\_MIR21\_TARGETS

KYNG\_DNA\_DAMAGE\_DN  
KARLSSON\_TGFB1\_TARGETS\_DN  
CAIRO\_HEPATOBLASTOMA\_UP  
CADWELL\_ATG16L1\_TARGETS\_UP  
KOYAMA\_SEMA3B\_TARGETS\_DN  
VANOEVELEN\_MYOGENESIS\_SIN3A\_TARGETS  
GRAESSMANN\_RESPONSE\_TO\_MC\_AND\_DOXORUBICIN\_UP  
WATANABE\_RECTAL\_CANCER\_RADIOOTHERAPY\_RESPONSIVE\_UP  
FARMER\_BREAST\_CANCER\_APOCRINE\_VS\_LUMINAL  
CHYLA\_CBFA2T3\_TARGETS\_DN  
YAO\_HOXA10\_TARGETS\_VIA\_PROGESTERONE\_UP  
HEDENFALK\_BREAST\_CANCER\_BRCA1\_VS\_BRCA2  
GRAESSMANN\_APOPTOSIS\_BY\_DOXORUBICIN\_UP  
MAHAJAN\_RESPONSE\_TO\_IL1A\_DN  
MCBRYAN\_PUBERTAL\_BREAST\_6\_7WK\_UP  
MILI\_PSEUDOPODIA\_HAPTOTAXIS\_UP  
PURBEY\_TARGETS\_OF\_CTBP1\_NOT\_SATB1\_UP  
DAIRKEE\_TERT\_TARGETS\_UP  
REACTOME\_INTEGRATION\_OF\_ENERGY\_METABOLISM  
MEISSNER\_NPC\_HCP\_WITH\_H3K4ME2  
URS\_ADIPOCYTE\_DIFFERENTIATION\_UP  
REACTOME\_BIOLOGICAL\_OXIDATIONS  
VERHAAK\_GLIOMASTOMA\_MESENCHYMAL  
FLECHNER\_BIOPSY\_KIDNEY\_TRANSPLANT\_OK\_VS\_DONOR\_UP  
DAZARD\_RESPONSE\_TO\_UV\_NHEK\_UP  
YANG\_BCL3\_TARGETS\_UP  
TAKAO\_RESPONSE\_TO\_UVB\_RADIATION\_UP  
SENGUPTA\_NASOPHARYNGEAL\_CARCINOMA\_WITH\_LMP1\_DN  
YAO\_TEMPORAL\_RESPONSE\_TO\_PROGESTERONE\_CLUSTER\_17  
RAY\_TUMORIGENESIS\_BY\_ERBB2\_CDC25A\_DN  
GOTZMANN\_EPITHELIAL\_TO\_MESENCHYMAL\_TRANSITION\_DN  
UEDA\_PERIFERAL\_CLOCK  
WANG\_SMARCE1\_TARGETS\_DN  
MIKKELSEN\_ES\_ICP\_WITH\_H3K4ME3  
SPIELMAN\_LYMPHOBLAST\_EUROPEAN\_VS\_ASIAN\_DN  
BASAKI\_YBX1\_TARGETS\_DN  
DAVICIONI\_MOLECULAR\_ARMS\_VS\_ERMS\_UP  
MCBRYAN\_PUBERTAL\_BREAST\_5\_6WK\_DN  
SHEPARD\_CRUSH\_AND\_BURN\_MUTANT\_UP  
LIM\_MAMMARY\_STEM\_CELL\_DN  
MOHANKUMAR\_TLX1\_TARGETS\_UP  
WEST\_ADRENOCORTICAL\_TUMOR\_DN

MONNIER\_POSTRADIATION\_TUMOR\_ESCAPE\_DN  
DITTMER\_PTHLH\_TARGETS\_UP  
ACEVEDO\_FGFR1\_TARGETS\_IN\_PROSTATE\_CANCER\_MODEL\_DN  
AFFAR\_YY1\_TARGETS\_UP  
LU\_AGING\_BRAIN\_UP  
JOHNSTONE\_PARVB\_TARGETS\_3\_UP  
LIM\_MAMMARY\_STEM\_CELL\_UP  
KAYO\_AGING\_MUSCLE\_DN  
OUELLET\_CULTURED\_OVARIAN\_CANCER\_INVASIVE\_VS\_LMP\_UP  
ONKEN\_UVEAL\_MELANOMA\_DN  
BUYTAERT\_PHOTODYNAMIC\_THERAPY\_STRESS\_UP  
DAVICIONI\_TARGETS\_OF\_PAX\_FOXO1\_FUSIONS\_UP  
OKUMURA\_INFLAMMATORY\_RESPONSE\_LPS  
BYSTRYKH\_HEMATOPOIESIS\_STEM\_CELL\_QTL\_CIS  
TONKS\_TARGETS\_OF\_RUNX1\_RUNX1T1\_FUSION\_MONOCYTE\_UP  
SMID\_BREAST\_CANCER\_LUMINAL\_A\_UP  
LIU\_PROSTATE\_CANCER\_DN  
DUTERTRE ESTRADIOL\_RESPONSE\_24HR\_DN  
GRAESSMANN\_APOPTOSIS\_BY\_DOXORUBICIN\_DN  
EBAUER\_TARGETS\_OF\_PAX3\_FOXO1\_FUSION\_UP  
RATTENBACHER\_BOUND\_BY\_CELF1  
HSIAO\_HOUSEKEEPING\_GENES  
FEVR\_CTNNB1\_TARGETS\_UP  
CHEMNITZ\_RESPONSE\_TO\_PROSTAGLANDIN\_E2\_DN  
DURAND\_STROMA\_MAX\_UP  
MIKKELSEN\_NPC\_ICP\_WITH\_H3K4ME3  
RUTELLA\_RESPONSE\_TO\_HGF\_UP  
GAZDA\_DIAMOND\_BLACKFAN\_ANEMIA\_ERYTHROID\_DN  
CREIGHTON\_ENDOCRINE\_THERAPY\_RESISTANCE\_4  
LEIN\_CHOROID\_PLEXUS\_MARKERS  
VECCHI\_GASTRIC\_CANCER\_EARLY\_DN  
JOHNSTONE\_PARVB\_TARGETS\_2\_DN  
RUTELLA\_RESPONSE\_TO\_HGF\_VS\_CSF2RB\_AND\_IL4\_UP  
GOBERT\_OLIGODENDROCYTE\_DIFFERENTIATION\_DN  
PENG\_RAPAMYCIN\_RESPONSE\_DN  
KRIGE\_RESPONSE\_TO\_TOSEDOSTAT\_24HR\_UP  
KAYO\_AGING\_MUSCLE\_UP  
MILI\_PSEUDOPODIA\_CHEMOTAXIS\_DN  
QI\_HYPOXIA  
CHANDRAN\_METASTASIS\_DN  
IWANAGA\_CARCINOGENESIS\_BY\_KRAS\_PTEN\_DN  
ALONSO\_METASTASIS\_UP



DELACROIX\_RARG\_BOUND\_MEF  
KRIGE\_RESPONSE\_TO\_TOSEDOSTAT\_24HR\_DN  
MULLIGHAN\_NPM1\_MUTATED\_SIGNATURE\_1\_UP  
PHONG\_TNF\_RESPONSE\_VIA\_P38\_COMPLETE  
FORTSCHEGGER\_PHF8\_TARGETS\_DN  
WANG\_MLL\_TARGETS  
RICKMAN\_METASTASIS\_UP  
ELVIDGE\_HYPOXIA\_UP  
BERTUCCI\_MEDULLARY\_VS\_DUCTAL\_BREAST\_CANCER\_DN  
LIU\_SOX4\_TARGETS\_DN  
ZHOU\_INFLAMMATORY\_RESPONSE\_FIMA\_DN  
KRIGE\_RESPONSE\_TO\_TOSEDOSTAT\_6HR\_UP  
MCBRYAN\_PUBERTAL\_BREAST\_5\_6WK\_UP  
LI\_WILMS\_TUMOR\_VS\_FETAL\_KIDNEY\_1\_UP  
BENPORATH\_MYC\_MAX\_TARGETS  
ELVIDGE\_HIF1A\_TARGETS\_DN  
GRAESSMANN\_APOPTOSIS\_BY\_SERUM\_DEPRIVATION\_DN  
LOCKWOOD\_AMPLIFIED\_IN\_LUNG\_CANCER  
IVANOVA\_HEMATOPOIESIS\_STEM\_CELL\_AND\_PROGENITOR  
DER\_IFN\_BETA\_RESPONSE\_UP  
CAIRO\_HEPATOBLASTOMA\_CLASSES\_DN  
WAMUNYOKOLI\_OVARIAN\_CANCER\_GRADES\_1\_2\_UP  
BOQUEST\_STEM\_CELL\_UP  
BENPORATH\_PRC2\_TARGETS  
ELVIDGE\_HIF1A\_AND\_HIF2A\_TARGETS\_DN  
LENAOUR\_DENDRITIC\_CELL\_MATURATION\_UP  
LU\_EZH2\_TARGETS\_UP  
PILON\_KLF1\_TARGETS\_UP  
LABBE\_TGFB1\_TARGETS\_DN  
ENK\_UV\_RESPONSE\_KERATINOCYTE\_UP  
JAATINEN\_HEMATOPOIETIC\_STEM\_CELL\_UP  
RAO\_BOUND\_BY\_SALL4\_ISOFORM\_A  
MIKKELSEN\_MEF\_HCP\_WITH\_H3K27ME3  
RUTELLA\_RESPONSE\_TO\_CSF2RB\_AND\_IL4\_DN  
ZHANG\_RESPONSE\_TO\_CANTHARIDIN\_DN  
BAKKER\_FOXO3\_TARGETS\_DN  
REACTOME\_TRANSMEMBRANE\_TRANSPORT\_OF\_SMALL\_MOLECULES  
RICKMAN\_TUMOR\_DIFFERENTIATED\_WELL\_VS\_POORLY\_UP  
BIDUS\_METASTASIS\_DN  
SMID\_BREAST\_CANCER\_LUMINAL\_B\_UP  
SERVITJA\_LIVER\_HNF1A\_TARGETS\_UP  
JIANG\_HYPOXIA\_NORMAL

ZWANG\_CLASS\_3\_TRANSIENTLY\_INDUCED\_BY\_EGF  
ODONNELL\_TFRC\_TARGETS\_UP  
CREIGHTON\_ENDOCRINE\_THERAPY\_RESISTANCE\_5  
CHIARADONNA\_NEOPLASTIC\_TRANSFORMATION\_CDC25\_DN  
KRIGE\_RESPONSE\_TO\_TOSEDOSTAT\_6HR\_DN  
ELVIDGE\_HYPOXIA\_BY\_DMOG\_UP  
DELYS\_THYROID\_CANCER\_DN  
LI\_AMPLIFIED\_IN\_LUNG\_CANCER  
ELVIDGE\_HYPOXIA\_DN  
LASTOWSKA\_NEUROBLASTOMA\_COPY\_NUMBER\_DN  
DODD\_NASOPHARYNGEAL\_CARCINOMA\_UP  
MULLIGHAN\_MLL\_SIGNATURE\_2\_DN  
PURBEY\_TARGETS\_OF\_CTBP1\_AND\_SATB1\_DN  
SHEDDEN\_LUNG\_CANCER\_GOOD\_SURVIVAL\_A4  
CHANG\_CORE\_SERUM\_RESPONSE\_DN  
FARMER\_BREAST\_CANCER\_APOCRINE\_VS\_BASAL  
LEE\_NEURAL\_CREST\_STEM\_CELL\_UP  
RODRIGUES\_THYROID\_CARCINOMA\_ANAPLASTIC\_DN  
LINDGREN\_BLADDER\_CANCER\_CLUSTER\_3\_DN  
BRUINS\_UVC\_RESPONSE\_VIA\_TP53\_GROUP\_B  
ONKEN\_UVEAL\_MELANOMA\_UP  
TONKS\_TARGETS\_OF\_RUNX1\_RUNX1T1\_FUSION\_ERYTHROCYTE\_UP  
IVANOVA\_HEMATOPOIESIS\_STEM\_CELL  
YAGI\_AML\_WITH\_INV\_16\_TRANSLOCATION  
ACEVEDO\_LIVER\_TUMOR\_VS\_NORMAL\_ADJACENT\_TISSUE\_UP  
HORIUCHI\_WTAP\_TARGETS\_UP  
LOPEZ\_MBD\_TARGETS  
YAO\_TEMPORAL\_RESPONSE\_TO\_PROGESTERONE\_CLUSTER\_9  
TORCHIA\_TARGETS\_OF\_EWSR1\_FLI1\_FUSION\_UP  
KYNG\_WERNER\_SYNDROM\_AND\_NORMAL\_AGING\_DN  
GAUSSMANN\_MLL\_AF4\_FUSION\_TARGETS\_G\_UP  
FULCHER\_INFLAMMATORY\_RESPONSE\_LECTIN\_VS\_LPS\_DN  
BROWNE\_HCMV\_INFECTION\_20HR\_UP  
VANTVEER\_BREAST\_CANCER\_ESR1\_UP  
MOREAUX\_MULTIPLE\_MYELOMA\_BY\_TACI\_UP  
DOUGLAS\_BMI1\_TARGETS\_DN  
MCBRYAN\_PUBERTAL\_TGFB1\_TARGETS\_UP  
CASORELLI\_ACUTE\_PROMYELOCYTIC\_LEUKEMIA\_DN  
FERNANDEZ\_BOUND\_BY\_MYC  
KEGG\_GLUTATHIONE\_METABOLISM  
NING\_CHRONIC\_OBSTRUCTIVE\_PULMONARY\_DISEASE\_DN  
WINTER\_HYPOXIA\_METAGENE

PLASARI\_TGFB1\_TARGETS\_10HR\_DN  
SATO\_SILENCED\_BY\_METHYLATION\_IN\_PANCREATIC\_CANCER\_1  
BONOME\_OVARIAN\_CANCER\_SURVIVAL\_OPTIMAL\_DEBULKING  
IGLESIAS\_E2F\_TARGETS\_UP  
XU\_GH1\_AUTOCRINE\_TARGETS\_DN  
PEDERSEN\_METASTASIS\_BY\_ERBB2\_ISOFORM\_7  
RHEIN\_ALL\_GLUCOCORTICOID\_THERAPY\_DN  
POTTI\_TOPOTECAN\_SENSITIVITY  
KONDO\_EZH2\_TARGETS  
ELVIDGE\_HYPOXIA\_BY\_DMOG\_DN  
TURASHVILI\_BREAST\_DUCTAL\_CARCINOMA\_VS\_DUCTAL\_NORMAL\_DN  
FOSTER\_KDM1A\_TARGETS\_DN  
MEISSNER\_NPC\_HCP\_WITH\_H3\_UNMETHYLATED  
REACTOME\_DEVELOPMENTAL\_BIOLOGY  
BANDRES\_RESPONSE\_TO\_CARMUSTIN\_MGMT\_48HR\_DN  
BOQUEST\_STEM\_CELL\_CULTURED\_VS\_FRESH\_UP  
CASORELLI\_ACUTE\_PROMYELOCYTIC\_LEUKEMIA\_UP  
ENK\_UV\_RESPONSE\_KERATINOCYTE\_DN  
FORTSCHEGGER\_PHF8\_TARGETS\_UP  
SCHAEFFER\_PROSTATE\_DEVELOPMENT\_6HR\_UP  
BENPORATH\_SUZ12\_TARGETS  
MARTINEZ\_RB1\_TARGETS\_DN  
WEI\_MIR34A\_TARGETS  
BROWNE\_HCMV\_INFECTION\_18HR\_DN  
BYSTRYKH\_HEMATOPOIESIS\_STEM\_CELL\_AND\_BRAIN\_QTL\_TRANS  
WELCSH\_BRCA1\_TARGETS\_UP  
BENPORATH\_ES\_WITH\_H3K27ME3  
MIYAGAWA\_TARGETS\_OF\_EWSR1\_ETS\_FUSIONS\_DN  
TSENG\_IRS1\_TARGETS\_DN  
TAKEDA\_TARGETS\_OF\_NUP98\_HOXA9\_FUSION\_10D\_DN  
ZWANG\_TRANSIENTLY\_UP\_BY\_1ST\_EGF\_PULSE\_ONLY  
BROWNE\_HCMV\_INFECTION\_1HR\_DN  
MCCLUNG\_CREB1\_TARGETS\_UP  
YEGNASUBRAMANIAN\_PROSTATE\_CANCER  
SCHAEFFER\_PROSTATE\_DEVELOPMENT\_12HR\_UP  
LIU\_CMYB\_TARGETS\_UP  
BRUINS\_UVC\_RESPONSE\_EARLY\_LATE  
WEI\_MYCN\_TARGETS\_WITH\_E\_BOX  
GRAESSMANN\_APOPTOSIS\_BY\_SERUM\_DEPRIVATION\_UP  
RAO\_BOUND\_BY\_SALL4\_ISOFORM\_B  
KEGG\_LYSOSOME  
CHIARADONNA\_NEOPLASTIC\_TRANSFORMATION\_KRAS\_DN

LINDGREN\_BLADDER\_CANCER\_CLUSTER\_2A\_DN  
SESTO\_RESPONSE\_TO\_UV\_C8  
MASSARWEH\_TAMOXIFEN\_RESISTANCE\_UP  
FULCHER\_INFLAMMATORY\_RESPONSE\_LECTIN\_VS\_LPS\_UP  
ZHANG\_TLX\_TARGETS\_60HR\_UP  
KIM\_WT1\_TARGETS\_8HR\_DN  
BONOME\_OVARIAN\_CANCER\_SURVIVAL\_SUBOPTIMAL\_DEBULKING  
FOSTER\_TOLERANT\_MACROPHAGE\_UP  
SWEET\_LUNG\_CANCER\_KRAS\_DN  
ZWANG\_TRANSIENTLY\_UP\_BY\_2ND\_EGF\_PULSE\_ONLY  
DANG\_BOUND\_BY\_MYC  
FARMER\_BREAST\_CANCER\_BASAL\_VS\_LUTEMINAL  
GAUSSMANN\_MLL\_AF4\_FUSION\_TARGETS\_F\_UP  
TAKEDA\_TARGETS\_OF\_NUP98\_HOXA9\_FUSION\_3D\_UP  
SENESE\_HDAC1\_TARGETS\_DN  
YAO\_TEMPORAL\_RESPONSE\_TO\_PROGESTERONE\_CLUSTER\_6  
BRUINS\_UVC\_RESPONSE\_LATE  
ACEVEDO\_METHYLATED\_IN\_LIVER\_CANCER\_DN  
RUTELLA\_RESPONSE\_TO\_CSF2RB\_AND\_IL4\_UP  
OUELLET\_OVARIAN\_CANCER\_INVASIVE\_VS\_LMP\_UP  
KATSANOUELAVL1\_TARGETS\_DN  
YAO\_TEMPORAL\_RESPONSE\_TO\_PROGESTERONE\_CLUSTER\_12  
ACEVEDO\_LIVER\_CANCER\_UP  
RIGGINS\_TAMOXIFEN\_RESISTANCE\_DN  
DURAND\_STROMA\_MAX\_DN  
BOUDOUKHA\_BOUND\_BY\_IGF2BP2  
WESTON\_VEGFA\_TARGETS  
HAN\_SATB1\_TARGETS\_UP  
BENPORATH\_SOX2\_TARGETS  
KYNG\_DNA\_DAMAGE\_UP  
REN\_ALVEOLAR\_RHABDOMYOSARCOMA\_DN  
SANSOM\_APC\_TARGETS\_DN  
CHIANG\_LIVER\_CANCER\_SUBCLASS\_UNANNOTATED\_DN  
MULLIGHAN\_MLL\_SIGNATURE\_1\_DN  
KAYO\_CALORIE\_RESTRICTION\_MUSCLE\_UP  
OSMAN\_BLADDER\_CANCER\_UP  
AMUNDSON\_RESPONSE\_TO\_ARSENITE  
MARTENS\_TRETINOIN\_RESPONSE\_UP  
REACTOME\_NGF\_SIGNALLING\_VIA\_TRKA\_FROM\_THE\_PLASMA\_MEMBRANE  
OSWALD\_HEMATOPOIETIC\_STEM\_CELL\_IN\_COLLAGEN\_GEL\_DN  
DURCHDEWALD\_SKIN\_CARCINOGENESIS\_DN  
WANG\_TUMOR\_INVASIVENESS\_UP

GROSS\_HYPOXIA\_VIA\_ELK3\_AND\_HIF1A\_UP  
PID\_HIF1\_TFPATHWAY  
MULLIGHAN\_NPM1\_SIGNATURE\_3\_UP  
BYSTRYKH\_HEMATOPOIESIS\_STEM\_CELL\_QTL\_TRANS  
MCCABE\_BOUND\_BY\_HOXC6  
STARK\_PREFRONTAL\_CORTEX\_22Q11\_DELETION\_UP  
TIEN\_INTESTINE\_PROBIOTICS\_6HR\_DN  
PEDRIOLI\_MIR31\_TARGETS\_DN  
BROWN\_MYELOID\_CELL\_DEVELOPMENT\_UP  
VANDESLUIS\_COMMD1\_TARGETS\_GROUP\_3\_UP  
DACOSTA\_UV\_RESPONSE\_VIA\_ERCC3\_UP  
LEE\_BMP2\_TARGETS\_UP  
WANG\_SMARCE1\_TARGETS\_UP  
HOLLMANN\_APOPTOSIS\_VIA\_CD40\_DN  
HATADA\_METHYLATED\_IN\_LUNG\_CANCER\_UP  
ZHANG\_TLX\_TARGETS\_36HR\_UP  
DOUGLAS\_BMI1\_TARGETS\_UP  
SCHAEFFER\_PROSTATE\_DEVELOPMENT\_48HR\_UP  
ENK\_UV\_RESPONSE\_EPIDERMIS\_DN  
ENK\_UV\_RESPONSE\_EPIDERMIS\_UP  
YAMAZAKI\_TCEB3\_TARGETS\_DN  
WANG\_CISPLATIN\_RESPONSE\_AND\_XPC\_DN  
MARTORIATI\_MDM4\_TARGETS\_FETAL\_LIVER\_UP  
SMITH\_TERT\_TARGETS\_DN  
DAVICIONI\_MOLECULAR\_ARMS\_VS\_ERMS\_DN  
SANSOM\_APC\_MYC\_TARGETS  
WANG\_LMO4\_TARGETS\_UP  
NING\_CHRONIC\_OBSTRUCTIVE\_PULMONARY\_DISEASE\_UP  
TOOKER\_GEMCITABINE\_RESISTANCE\_DN  
LIU\_SOX4\_TARGETS\_UP  
WANG\_CLIM2\_TARGETS\_UP  
LU\_EZH2\_TARGETS\_DN  
LEE\_RECENT\_THYMIC\_EMIGRANT  
MARTORIATI\_MDM4\_TARGETS\_NEUROEPITHELIUM\_UP  
GARY\_CD5\_TARGETS\_UP  
MITSIADES\_RESPONSE\_TO\_APLIDIN\_UP  
REACTOME\_SIGNALLING\_BY\_NGF  
IVANOVA\_HEMATOPOIESIS\_MATURE\_CELL  
BAELDE\_DIABETIC\_NEPHROPATHY\_DN  
BHAT\_ESR1\_TARGETS\_VIA\_AKT1\_UP  
RODRIGUES\_THYROID\_CARCINOMA\_POORLY\_DIFFERENTIATED\_DN  
REACTOME\_SLC\_MEDIATED\_TRANSMEMBRANE\_TRANSPORT

RUIZ\_TNC\_TARGETS\_UP  
SENGUPTA\_NASOPHARYNGEAL\_CARCIOMA\_WITH\_LMP1\_UP  
RIGGI\_EWING\_SARCOMA\_PROGENITOR\_UP  
CONCANNON\_APOPTOSIS\_BY\_EPOXOMICIN\_UP  
KOYAMA\_SEMA3B\_TARGETS\_UP  
TAKEDA\_TARGETS\_OF\_NUP98\_HOXA9\_FUSION\_8D\_DN  
VERHAAK\_GLIOMASTOMA\_CLASSICAL  
NUYTTEN\_NIPP1\_TARGETS\_UP  
MCBRYAN\_PUBERTAL\_BREAST\_3\_4WK\_UP  
PEREZ\_TP63\_TARGETS  
HUTTMANN\_B\_CLL\_POOR\_SURVIVAL\_UP  
JAEGER\_METASTASIS\_DN  
DEBIASI\_APOPTOSIS\_BY\_REOVIRUS\_INFECTIION\_UP  
MEISSNER\_NPC\_HCP\_WITH\_H3K4ME2\_AND\_H3K27ME3  
FOSTER\_KDM1A\_TARGETS\_UP  
SWEET\_LUNG\_CANCER\_KRAS\_UP  
DARWICHE\_PAPILLOMA\_RISK\_LOW\_UP  
ACEVEDO\_LIVER\_CANCER\_WITH\_H3K27ME3\_UP  
LASTOWSKA\_NEUROBLASTOMA\_COPY\_NUMBER\_UP  
PEREZ\_TP53\_TARGETS  
SARRIO\_EPITHELIAL\_MESENCHYMAL\_TRANSITION\_DN  
GRAESSMANN\_RESPONSE\_TO\_MC\_AND\_DOXORUBICIN\_DN  
MONNIER\_POSTRADIATION\_TUMOR\_ESCAPE\_UP  
CUI\_TCF21\_TARGETS\_2\_DN  
IVANOVA\_HEMATOPOIESIS\_STEM\_CELL\_LONG\_TERM  
DARWICHE\_SQUAMOUS\_CELL\_CARCIOMA\_UP  
WAMUNYOKOLI\_OVARIAN\_CANCER\_LMP\_DN  
GAVIN\_FOXP3\_TARGETS\_CLUSTER\_T7  
VECCHI\_GASTRIC\_CANCER\_ADVANCED\_VS\_EARLY\_UP  
ALFANO\_MYC\_TARGETS  
DARWICHE\_PAPILLOMA\_RISK\_HIGH\_UP

| GS DETAILS  | SIZE | ES         | NES       | NOM p-val | FDR q-val | FWER p-val |
|-------------|------|------------|-----------|-----------|-----------|------------|
| Details ... | 120  | 0.5567907  | 3.4528677 | 0         | 0         | 0          |
| Details ... | 149  | 0.5368174  | 3.4112723 | 0         | 0         | 0          |
| Details ... | 53   | 0.64009184 | 3.3214676 | 0         | 0         | 0          |
| Details ... | 143  | 0.52003324 | 3.318777  | 0         | 0         | 0          |
| Details ... | 91   | 0.5445675  | 3.183926  | 0         | 0         | 0          |
| Details ... | 16   | 0.83798796 | 3.0889807 | 0         | 0         | 0          |
| Details ... | 86   | 0.526011   | 3.06514   | 0         | 0         | 0          |
| Details ... | 97   | 0.5102713  | 3.008786  | 0         | 0         | 0          |
| Details ... | 86   | 0.50903213 | 2.9798276 | 0         | 0         | 0          |
| Details ... | 32   | 0.64017785 | 2.9114258 | 0         | 0         | 0          |
| Details ... | 108  | 0.4760197  | 2.8912807 | 0         | 0         | 0          |
| Details ... | 170  | 0.43793198 | 2.880777  | 0         | 0         | 0          |
| Details ... | 19   | 0.7294644  | 2.8777118 | 0         | 0         | 0          |
| Details ... | 60   | 0.5243009  | 2.8351731 | 0         | 0         | 0          |
| Details ... | 22   | 0.68693024 | 2.8076506 | 0         | 0         | 0          |
| Details ... | 54   | 0.53811944 | 2.804148  | 0         | 0         | 0          |
| Details ... | 75   | 0.49178922 | 2.788141  | 0         | 0         | 0          |
| Details ... | 24   | 0.65528977 | 2.7831016 | 0         | 0         | 0          |
| Details ... | 63   | 0.5103762  | 2.7584505 | 0         | 0         | 0          |
| Details ... | 26   | 0.640337   | 2.7582848 | 0         | 0         | 0          |
|             | 73   | 0.4860322  | 2.7564297 | 0         | 0         | 0          |
|             | 63   | 0.5050295  | 2.7497046 | 0         | 0         | 0          |
|             | 59   | 0.5205127  | 2.7387342 | 0         | 0         | 0          |
|             | 54   | 0.51771975 | 2.7300854 | 0         | 0         | 0          |
|             | 114  | 0.44676802 | 2.7239757 | 0         | 0         | 0          |
|             | 56   | 0.52393657 | 2.7173803 | 0         | 0         | 0          |
|             | 64   | 0.49446663 | 2.6912634 | 0         | 0         | 0          |
|             | 60   | 0.5034637  | 2.685779  | 0         | 0         | 0          |
|             | 118  | 0.43318492 | 2.681852  | 0         | 0         | 0          |
|             | 51   | 0.5112632  | 2.6500843 | 0         | 0         | 0          |
|             | 31   | 0.59759635 | 2.6384518 | 0         | 0         | 0          |
|             | 81   | 0.44764754 | 2.5921838 | 0         | 1.92E-05  | 0.001      |
|             | 149  | 0.39762613 | 2.567635  | 0         | 1.87E-05  | 0.001      |
|             | 26   | 0.6011436  | 2.5411012 | 0         | 3.63E-05  | 0.002      |
|             | 40   | 0.5211508  | 2.5295446 | 0         | 3.52E-05  | 0.002      |
|             | 16   | 0.6669404  | 2.430084  | 0         | 1.04E-04  | 0.006      |
|             | 19   | 0.6293251  | 2.4299715 | 0         | 1.02E-04  | 0.006      |
|             | 16   | 0.65501815 | 2.4061291 | 0         | 1.48E-04  | 0.009      |
|             | 16   | 0.64507    | 2.3772972 | 0         | 1.77E-04  | 0.011      |
|             | 33   | 0.5156491  | 2.332877  | 0         | 3.28E-04  | 0.021      |
|             | 34   | 0.48927832 | 2.281657  | 0         | 6.09E-04  | 0.038      |

|     |            |           |            |            |       |
|-----|------------|-----------|------------|------------|-------|
| 48  | 0.4452335  | 2.2719545 | 0          | 6.69E-04   | 0.043 |
| 21  | 0.56372046 | 2.2567334 | 0          | 8.58E-04   | 0.057 |
| 17  | 0.59690285 | 2.2320173 | 0          | 0.0010389  | 0.07  |
| 19  | 0.57014126 | 2.2192123 | 0          | 0.00116958 | 0.08  |
| 20  | 0.56442636 | 2.2127624 | 0          | 0.00122577 | 0.086 |
| 40  | 0.46073997 | 2.1916304 | 0          | 0.00150564 | 0.108 |
| 28  | 0.5047059  | 2.191559  | 0          | 0.00147427 | 0.108 |
| 37  | 0.45432153 | 2.15346   | 0          | 0.00213062 | 0.157 |
| 45  | 0.43029454 | 2.1308012 | 0          | 0.00251276 | 0.186 |
| 52  | 0.4113396  | 2.1302946 | 0          | 0.00250018 | 0.189 |
| 30  | 0.47316027 | 2.1298368 | 0.00132275 | 0.0024521  | 0.189 |
| 29  | 0.4740071  | 2.1295543 | 0          | 0.00242936 | 0.191 |
| 71  | 0.3771787  | 2.11551   | 0          | 0.00274679 | 0.216 |
| 36  | 0.45477572 | 2.110361  | 0.00123153 | 0.00277676 | 0.222 |
| 71  | 0.37722367 | 2.0974057 | 0          | 0.00316193 | 0.249 |
| 15  | 0.57234186 | 2.0922253 | 0          | 0.00326132 | 0.259 |
| 19  | 0.545314   | 2.0853307 | 0          | 0.00362593 | 0.288 |
| 21  | 0.50784934 | 2.0617447 | 0          | 0.00452007 | 0.348 |
| 27  | 0.47569528 | 2.0551393 | 0          | 0.00484123 | 0.375 |
| 24  | 0.48894766 | 2.0441296 | 0          | 0.00533388 | 0.408 |
| 18  | 0.5325482  | 2.028561  | 0          | 0.00617593 | 0.465 |
| 17  | 0.54195195 | 2.0125213 | 0          | 0.00719089 | 0.523 |
| 105 | 0.33052132 | 2.0041952 | 0          | 0.00783501 | 0.565 |
| 29  | 0.46056813 | 2.0038118 | 0.0013089  | 0.00774346 | 0.566 |
| 33  | 0.4315353  | 1.9837563 | 0          | 0.00942187 | 0.635 |
| 28  | 0.44985685 | 1.9722955 | 0.00258732 | 0.01044083 | 0.67  |
| 15  | 0.5506906  | 1.9536812 | 0.00139665 | 0.01229186 | 0.726 |
| 26  | 0.46632758 | 1.9483888 | 0.0013624  | 0.01264929 | 0.742 |
| 25  | 0.45861757 | 1.9381139 | 0.0013624  | 0.01376326 | 0.774 |
| 63  | 0.34904507 | 1.9170665 | 0.00117371 | 0.01649151 | 0.838 |
| 15  | 0.53872025 | 1.9086117 | 0.00146199 | 0.01765553 | 0.872 |
| 170 | 0.28971016 | 1.8972653 | 0          | 0.01926063 | 0.903 |
| 78  | 0.33232394 | 1.8933047 | 0          | 0.01978664 | 0.91  |
| 22  | 0.4821229  | 1.8919865 | 0.00404858 | 0.01973276 | 0.91  |
| 61  | 0.34310782 | 1.8770348 | 0.00598086 | 0.02223035 | 0.938 |
| 16  | 0.51638544 | 1.8756979 | 0.00719425 | 0.0222763  | 0.941 |
| 61  | 0.34638715 | 1.8729128 | 0.00121951 | 0.02260882 | 0.944 |
| 18  | 0.48513788 | 1.8721052 | 0.00568182 | 0.02244858 | 0.945 |
| 70  | 0.33456257 | 1.8624715 | 0.00358423 | 0.0240808  | 0.955 |
| 35  | 0.39767453 | 1.8534288 | 0.00248447 | 0.02560753 | 0.961 |
| 23  | 0.45003095 | 1.8441281 | 0.00815217 | 0.02735636 | 0.973 |
| 21  | 0.4714276  | 1.8390108 | 0.00827586 | 0.02814499 | 0.975 |



|     |            |           |            |            |       |
|-----|------------|-----------|------------|------------|-------|
| 50  | 0.35769287 | 1.8288002 | 0.00367647 | 0.03022512 | 0.983 |
| 43  | 0.37226424 | 1.8242712 | 0.0062422  | 0.03090842 | 0.986 |
| 38  | 0.37993106 | 1.8129306 | 0.00641849 | 0.03352172 | 0.994 |
| 108 | 0.2969451  | 1.8117949 | 0          | 0.03349689 | 0.996 |
| 55  | 0.34012607 | 1.8001404 | 0.00489596 | 0.03650617 | 0.999 |
| 27  | 0.42003253 | 1.7945675 | 0.00900901 | 0.03783006 | 0.999 |
| 22  | 0.43887508 | 1.7921478 | 0.00660502 | 0.03807173 | 0.999 |
| 102 | 0.2957537  | 1.7764577 | 0.00448934 | 0.04266392 | 0.999 |
| 16  | 0.47277415 | 1.7709914 | 0.01152738 | 0.04401872 | 0.999 |
| 110 | 0.28942132 | 1.7553349 | 0.0045403  | 0.04917914 | 0.999 |
| 29  | 0.39611948 | 1.750694  | 0.00390117 | 0.05055353 | 1     |
| 15  | 0.49053106 | 1.7330076 | 0.0189781  | 0.05684375 | 1     |
| 70  | 0.30971262 | 1.732332  | 0.00479616 | 0.0565119  | 1     |
| 26  | 0.40397167 | 1.708134  | 0.01604278 | 0.06645932 | 1     |
| 34  | 0.37198317 | 1.7020915 | 0.02261307 | 0.06885949 | 1     |
| 96  | 0.27303353 | 1.6353858 | 0.0122905  | 0.1091944  | 1     |
| 27  | 0.37295112 | 1.6348677 | 0.02906209 | 0.10854663 | 1     |
| 21  | 0.415266   | 1.6333482 | 0.0373444  | 0.1087428  | 1     |
| 44  | 0.3225287  | 1.6143358 | 0.03003755 | 0.12196419 | 1     |
| 52  | 0.30848768 | 1.6127936 | 0.02351485 | 0.12193838 | 1     |
| 23  | 0.39066604 | 1.5960883 | 0.03804348 | 0.1349286  | 1     |
| 18  | 0.40572748 | 1.5707952 | 0.04125178 | 0.1579898  | 1     |
| 66  | 0.2810829  | 1.5548587 | 0.02398082 | 0.17321624 | 1     |
| 117 | 0.25218874 | 1.5535923 | 0.0213964  | 0.17301898 | 1     |
| 20  | 0.39340946 | 1.5469369 | 0.04289544 | 0.1787712  | 1     |
| 16  | 0.41868502 | 1.5433388 | 0.056899   | 0.18097411 | 1     |
| 50  | 0.29332823 | 1.5298278 | 0.04545455 | 0.19365868 | 1     |
| 69  | 0.27790913 | 1.518282  | 0.04513064 | 0.20486984 | 1     |
| 24  | 0.36886853 | 1.5065386 | 0.06010929 | 0.21822864 | 1     |
| 24  | 0.35330236 | 1.4959002 | 0.06076618 | 0.23031572 | 1     |
| 31  | 0.32767397 | 1.4904894 | 0.07379135 | 0.23514688 | 1     |
| 32  | 0.32719222 | 1.4867401 | 0.052      | 0.2382653  | 1     |
| 35  | 0.31786352 | 1.4798993 | 0.07124682 | 0.24564762 | 1     |
| 20  | 0.371435   | 1.4783075 | 0.07084469 | 0.245835   | 1     |
| 130 | 0.2370338  | 1.4587888 | 0.04147982 | 0.27247438 | 1     |
| 88  | 0.24463809 | 1.437059  | 0.05704307 | 0.30410963 | 1     |
| 20  | 0.36512512 | 1.433768  | 0.09154929 | 0.30698198 | 1     |
| 37  | 0.3018404  | 1.4325286 | 0.07251909 | 0.30642965 | 1     |
| 18  | 0.37403032 | 1.4318434 | 0.0798898  | 0.30506283 | 1     |
| 21  | 0.3537643  | 1.4235446 | 0.08815427 | 0.3156241  | 1     |
| 22  | 0.34907332 | 1.42284   | 0.10280374 | 0.31415287 | 1     |
| 22  | 0.3502325  | 1.4165293 | 0.08344549 | 0.3226609  | 1     |

|     |            |           |            |            |   |
|-----|------------|-----------|------------|------------|---|
| 24  | 0.33815405 | 1.4086769 | 0.10187668 | 0.33368355 | 1 |
| 33  | 0.30383822 | 1.4083894 | 0.09220779 | 0.3316277  | 1 |
| 21  | 0.34639204 | 1.3989342 | 0.11020408 | 0.3453795  | 1 |
| 21  | 0.35264423 | 1.3932354 | 0.09563994 | 0.35308355 | 1 |
| 33  | 0.30378437 | 1.3905276 | 0.10913706 | 0.35508716 | 1 |
| 16  | 0.37936282 | 1.3897295 | 0.10449927 | 0.3538673  | 1 |
| 77  | 0.24155456 | 1.3712583 | 0.09512761 | 0.38451    | 1 |
| 17  | 0.3645959  | 1.369274  | 0.12338594 | 0.3853917  | 1 |
| 50  | 0.25663373 | 1.3664533 | 0.09927361 | 0.38764495 | 1 |
| 24  | 0.3245228  | 1.3578589 | 0.14266305 | 0.40146977 | 1 |
| 22  | 0.33551574 | 1.3551147 | 0.11942257 | 0.4041588  | 1 |
| 28  | 0.30771303 | 1.3464926 | 0.13403417 | 0.41816914 | 1 |
| 130 | 0.21202011 | 1.3393997 | 0.09419496 | 0.429195   | 1 |
| 15  | 0.36357996 | 1.3236222 | 0.15700142 | 0.45875636 | 1 |
| 47  | 0.2652786  | 1.3228114 | 0.14765906 | 0.45716897 | 1 |
| 25  | 0.30772707 | 1.3149687 | 0.16085792 | 0.47085795 | 1 |
| 29  | 0.29520905 | 1.3075933 | 0.15424165 | 0.48389292 | 1 |
| 37  | 0.27824494 | 1.3060824 | 0.15444015 | 0.48399165 | 1 |
| 20  | 0.3294279  | 1.3038187 | 0.16506189 | 0.48582178 | 1 |
| 43  | 0.26494107 | 1.3028193 | 0.15162908 | 0.48467964 | 1 |
| 19  | 0.32700264 | 1.3026478 | 0.16616766 | 0.4816732  | 1 |
| 18  | 0.33983338 | 1.2945684 | 0.15796703 | 0.4960373  | 1 |
| 22  | 0.314467   | 1.2919207 | 0.16802168 | 0.4985948  | 1 |
| 84  | 0.22302988 | 1.2913407 | 0.13302217 | 0.49652272 | 1 |
| 17  | 0.34237707 | 1.2904164 | 0.16137931 | 0.4951943  | 1 |
| 72  | 0.23154649 | 1.2902952 | 0.15501165 | 0.4921635  | 1 |
| 19  | 0.3296296  | 1.2846744 | 0.19535519 | 0.5014099  | 1 |
| 18  | 0.3389345  | 1.2821474 | 0.19168901 | 0.50373113 | 1 |
| 29  | 0.28647858 | 1.2797052 | 0.16449086 | 0.5056555  | 1 |
| 30  | 0.28616056 | 1.279588  | 0.1948718  | 0.50262094 | 1 |
| 40  | 0.26935357 | 1.2793578 | 0.15691158 | 0.49991655 | 1 |
| 28  | 0.28849518 | 1.2736433 | 0.188251   | 0.5094298  | 1 |
| 60  | 0.23481168 | 1.2704439 | 0.16867469 | 0.5132176  | 1 |
| 55  | 0.24399434 | 1.2699144 | 0.15815085 | 0.5112065  | 1 |
| 58  | 0.23722817 | 1.2668424 | 0.1760479  | 0.5145891  | 1 |
| 38  | 0.27144432 | 1.2663766 | 0.19367088 | 0.5124277  | 1 |
| 34  | 0.27089226 | 1.2643336 | 0.1932246  | 0.51380664 | 1 |
| 28  | 0.28831184 | 1.2566438 | 0.20794702 | 0.5275906  | 1 |
| 16  | 0.34308797 | 1.2514952 | 0.19859155 | 0.53588325 | 1 |
| 46  | 0.24870765 | 1.2508142 | 0.18491484 | 0.53412986 | 1 |
| 59  | 0.23714365 | 1.2462612 | 0.18599033 | 0.5410492  | 1 |
| 79  | 0.21926476 | 1.2449758 | 0.19328703 | 0.54073393 | 1 |

|     |            |           |            |            |   |
|-----|------------|-----------|------------|------------|---|
| 47  | 0.24725437 | 1.2395483 | 0.19876543 | 0.54981595 | 1 |
| 18  | 0.32497397 | 1.2392758 | 0.20920502 | 0.5470845  | 1 |
| 34  | 0.2673025  | 1.2387363 | 0.21161291 | 0.5450048  | 1 |
| 26  | 0.29068932 | 1.2345556 | 0.20619947 | 0.55142957 | 1 |
| 41  | 0.24966933 | 1.2318258 | 0.22058824 | 0.5542872  | 1 |
| 51  | 0.237121   | 1.2312988 | 0.21401753 | 0.5523476  | 1 |
| 65  | 0.22282495 | 1.2296664 | 0.19757576 | 0.552691   | 1 |
| 15  | 0.34857637 | 1.2275656 | 0.23829788 | 0.55420583 | 1 |
| 16  | 0.3325893  | 1.2254562 | 0.23268698 | 0.55592245 | 1 |
| 67  | 0.22282338 | 1.2197546 | 0.21589561 | 0.56540936 | 1 |
| 38  | 0.25313783 | 1.2196957 | 0.20764332 | 0.56238484 | 1 |
| 27  | 0.28140223 | 1.2194318 | 0.22827497 | 0.55980253 | 1 |
| 20  | 0.3114644  | 1.2119107 | 0.26008344 | 0.5736671  | 1 |
| 17  | 0.32787523 | 1.2083945 | 0.24637681 | 0.57838523 | 1 |
| 28  | 0.2739493  | 1.1993837 | 0.24435592 | 0.59633523 | 1 |
| 21  | 0.29854912 | 1.1961917 | 0.26121372 | 0.60038126 | 1 |
| 68  | 0.21471962 | 1.178295  | 0.24150059 | 0.63926214 | 1 |
| 48  | 0.2314567  | 1.1770478 | 0.256691   | 0.6386679  | 1 |
| 172 | 0.17905633 | 1.1736046 | 0.23734178 | 0.6432282  | 1 |
| 26  | 0.276617   | 1.1708204 | 0.2785808  | 0.64638805 | 1 |
| 22  | 0.28080532 | 1.1696888 | 0.27334234 | 0.64586675 | 1 |
| 52  | 0.2261871  | 1.1692929 | 0.2753623  | 0.6433833  | 1 |
| 77  | 0.20320565 | 1.1686615 | 0.24743444 | 0.6414224  | 1 |
| 26  | 0.27209765 | 1.1679127 | 0.25773194 | 0.6397518  | 1 |
| 37  | 0.24360201 | 1.16581   | 0.2697795  | 0.6414117  | 1 |
| 34  | 0.25400278 | 1.163333  | 0.29449424 | 0.6440588  | 1 |
| 62  | 0.21538612 | 1.1618917 | 0.27228916 | 0.6441212  | 1 |
| 35  | 0.2474459  | 1.1586543 | 0.26666668 | 0.6485113  | 1 |
| 25  | 0.27018747 | 1.1519212 | 0.27188328 | 0.6610654  | 1 |
| 16  | 0.32233223 | 1.150419  | 0.29834256 | 0.66135067 | 1 |
| 51  | 0.22208333 | 1.1437722 | 0.286578   | 0.6741172  | 1 |
| 26  | 0.2654723  | 1.1419525 | 0.30241936 | 0.6750955  | 1 |
| 67  | 0.20621814 | 1.1417453 | 0.3083434  | 0.6722578  | 1 |
| 79  | 0.20106524 | 1.1376231 | 0.27764976 | 0.6789856  | 1 |
| 28  | 0.26096973 | 1.1365083 | 0.32142857 | 0.67836565 | 1 |
| 58  | 0.2095555  | 1.1305048 | 0.30666667 | 0.68959755 | 1 |
| 25  | 0.26834974 | 1.1295422 | 0.3263434  | 0.6885908  | 1 |
| 37  | 0.23538221 | 1.1256579 | 0.27954257 | 0.694202   | 1 |
| 27  | 0.25867006 | 1.1221883 | 0.3320659  | 0.6990288  | 1 |
| 22  | 0.2760941  | 1.1218497 | 0.31889763 | 0.696517   | 1 |
| 42  | 0.22885956 | 1.1207498 | 0.30601794 | 0.6956458  | 1 |
| 30  | 0.2531255  | 1.1165508 | 0.35231787 | 0.7023367  | 1 |

|    |            |           |            |            |   |
|----|------------|-----------|------------|------------|---|
| 37 | 0.23646097 | 1.1141331 | 0.32290363 | 0.70492154 | 1 |
| 91 | 0.18743788 | 1.1130015 | 0.31105992 | 0.7044296  | 1 |
| 26 | 0.25730726 | 1.1109896 | 0.33111703 | 0.705817   | 1 |
| 19 | 0.2876109  | 1.1097357 | 0.32548475 | 0.70555264 | 1 |
| 50 | 0.21514112 | 1.1051655 | 0.33333334 | 0.71298873 | 1 |
| 42 | 0.22500932 | 1.101602  | 0.34522292 | 0.7180982  | 1 |
| 25 | 0.26016244 | 1.0956466 | 0.35607094 | 0.72935766 | 1 |
| 23 | 0.2665094  | 1.0947208 | 0.3395973  | 0.7281174  | 1 |
| 28 | 0.2539225  | 1.0943978 | 0.35778636 | 0.7256044  | 1 |
| 28 | 0.24990797 | 1.0914335 | 0.35890767 | 0.72928447 | 1 |
| 22 | 0.26755068 | 1.0885811 | 0.34246576 | 0.7325344  | 1 |
| 72 | 0.1948624  | 1.0861952 | 0.35638922 | 0.73475915 | 1 |
| 21 | 0.27692372 | 1.0837977 | 0.3648469  | 0.73726207 | 1 |
| 41 | 0.2191305  | 1.0820786 | 0.36724564 | 0.73807263 | 1 |
| 88 | 0.18292657 | 1.0816535 | 0.3696408  | 0.7356507  | 1 |
| 18 | 0.28509042 | 1.0771208 | 0.39275765 | 0.74297017 | 1 |
| 35 | 0.22922452 | 1.0746255 | 0.37468672 | 0.7455614  | 1 |
| 15 | 0.30276054 | 1.0702499 | 0.36416185 | 0.75248736 | 1 |
| 48 | 0.20843817 | 1.0668298 | 0.37931034 | 0.7571961  | 1 |
| 15 | 0.29109797 | 1.0666659 | 0.3755274  | 0.7542559  | 1 |
| 42 | 0.21600115 | 1.0635005 | 0.39375    | 0.7582158  | 1 |
| 18 | 0.27727944 | 1.062748  | 0.385989   | 0.7566636  | 1 |
| 48 | 0.20901279 | 1.0563529 | 0.3863928  | 0.7685972  | 1 |
| 29 | 0.23502997 | 1.0481019 | 0.40339425 | 0.784974   | 1 |
| 20 | 0.26588237 | 1.0475779 | 0.4197031  | 0.78278166 | 1 |
| 25 | 0.24867879 | 1.0464272 | 0.39583334 | 0.78207004 | 1 |
| 26 | 0.24412605 | 1.0447724 | 0.4        | 0.78256685 | 1 |
| 51 | 0.20060724 | 1.0417483 | 0.4136253  | 0.7863726  | 1 |
| 20 | 0.25903583 | 1.0391876 | 0.42564803 | 0.78916055 | 1 |
| 60 | 0.19267312 | 1.0379767 | 0.4241338  | 0.7887199  | 1 |
| 31 | 0.23208672 | 1.0364197 | 0.42784163 | 0.7890932  | 1 |
| 15 | 0.29353085 | 1.0357634 | 0.42674252 | 0.78736293 | 1 |
| 18 | 0.26781845 | 1.0277221 | 0.4322493  | 0.8026838  | 1 |
| 41 | 0.21209025 | 1.0232273 | 0.42322096 | 0.8096379  | 1 |
| 17 | 0.27375945 | 1.0226847 | 0.45531914 | 0.80751425 | 1 |
| 20 | 0.2598415  | 1.0167894 | 0.44285715 | 0.8179675  | 1 |
| 40 | 0.20793091 | 1.0165577 | 0.4347826  | 0.8151701  | 1 |
| 26 | 0.23954958 | 1.0163465 | 0.44083226 | 0.8123995  | 1 |
| 21 | 0.2541508  | 1.0152621 | 0.45467225 | 0.81164265 | 1 |
| 15 | 0.28153545 | 1.0150052 | 0.4564254  | 0.8089765  | 1 |
| 33 | 0.21779433 | 1.0136864 | 0.4380368  | 0.8087657  | 1 |
| 38 | 0.21594828 | 1.0128875 | 0.45559844 | 0.8072618  | 1 |

|     |            |            |            |            |   |
|-----|------------|------------|------------|------------|---|
| 26  | 0.23812737 | 1.0112662  | 0.45359477 | 0.80782783 | 1 |
| 22  | 0.24526925 | 1.0093234  | 0.4484127  | 0.8089585  | 1 |
| 43  | 0.20399474 | 1.0077692  | 0.4469697  | 0.8092823  | 1 |
| 27  | 0.23297442 | 1.0056901  | 0.46042216 | 0.81078035 | 1 |
| 82  | 0.1731868  | 1.0010822  | 0.46697038 | 0.817962   | 1 |
| 18  | 0.26546597 | 1.000074   | 0.45698166 | 0.817022   | 1 |
| 40  | 0.20222257 | 0.99697614 | 0.47388536 | 0.8208362  | 1 |
| 29  | 0.22129585 | 0.9880435  | 0.49076518 | 0.837626   | 1 |
| 20  | 0.24924442 | 0.9847132  | 0.4735376  | 0.841665   | 1 |
| 58  | 0.18366155 | 0.9846725  | 0.49095297 | 0.83854413 | 1 |
| 113 | 0.1587565  | 0.9733022  | 0.5343348  | 0.8604155  | 1 |
| 34  | 0.21208173 | 0.97219557 | 0.5031526  | 0.8596395  | 1 |
| 19  | 0.2564702  | 0.97156    | 0.49931034 | 0.8578588  | 1 |
| 22  | 0.2411043  | 0.9683622  | 0.50409836 | 0.86149925 | 1 |
| 28  | 0.21806242 | 0.9676554  | 0.5193076  | 0.8598216  | 1 |
| 57  | 0.1819722  | 0.9671299  | 0.51357734 | 0.85769856 | 1 |
| 19  | 0.24826089 | 0.9548034  | 0.5131397  | 0.88192123 | 1 |
| 77  | 0.16559337 | 0.95303977 | 0.5293441  | 0.88261086 | 1 |
| 21  | 0.23657444 | 0.9506773  | 0.5225718  | 0.8847425  | 1 |
| 51  | 0.18146199 | 0.94421923 | 0.55031055 | 0.89558    | 1 |
| 91  | 0.15945344 | 0.94249105 | 0.54545456 | 0.89603114 | 1 |
| 16  | 0.2571263  | 0.9416268  | 0.5331492  | 0.8946671  | 1 |
| 19  | 0.23908167 | 0.9404304  | 0.53494626 | 0.8941183  | 1 |
| 44  | 0.18794702 | 0.9389628  | 0.55936354 | 0.8941251  | 1 |
| 66  | 0.17180611 | 0.93506044 | 0.55035126 | 0.8991409  | 1 |
| 31  | 0.20849425 | 0.93253076 | 0.5364583  | 0.9012786  | 1 |
| 100 | 0.15567696 | 0.9321343  | 0.5774487  | 0.8989102  | 1 |
| 18  | 0.24309573 | 0.929298   | 0.5483871  | 0.9017854  | 1 |
| 23  | 0.22795843 | 0.9267972  | 0.56875837 | 0.9039908  | 1 |
| 25  | 0.2220486  | 0.92498    | 0.53937006 | 0.9044711  | 1 |
| 19  | 0.23742221 | 0.924499   | 0.55448276 | 0.90227807 | 1 |
| 45  | 0.18386582 | 0.92327005 | 0.58564234 | 0.90166926 | 1 |
| 22  | 0.22645962 | 0.9183763  | 0.552      | 0.9086654  | 1 |
| 15  | 0.25722402 | 0.9176127  | 0.5796703  | 0.90707463 | 1 |
| 24  | 0.21946704 | 0.9164139  | 0.5532787  | 0.9063806  | 1 |
| 33  | 0.20197065 | 0.9152896  | 0.58068615 | 0.90544915 | 1 |
| 34  | 0.19890445 | 0.9150309  | 0.56445557 | 0.90279025 | 1 |
| 117 | 0.14601332 | 0.9114978  | 0.6075388  | 0.9072029  | 1 |
| 35  | 0.19472404 | 0.90470594 | 0.5971867  | 0.91829735 | 1 |
| 20  | 0.22630842 | 0.90226746 | 0.59034485 | 0.92019707 | 1 |
| 19  | 0.23509711 | 0.8974665  | 0.60085225 | 0.9269619  | 1 |
| 39  | 0.18379562 | 0.89340746 | 0.5994898  | 0.93183357 | 1 |

|     |            |            |            |            |   |
|-----|------------|------------|------------|------------|---|
| 42  | 0.18062466 | 0.88563216 | 0.6388889  | 0.94423616 | 1 |
| 38  | 0.18285108 | 0.88186103 | 0.6073698  | 0.94858617 | 1 |
| 20  | 0.22233391 | 0.8808312  | 0.6293223  | 0.94746876 | 1 |
| 34  | 0.18755329 | 0.88061935 | 0.5987261  | 0.94470954 | 1 |
| 18  | 0.22913995 | 0.8805799  | 0.6320225  | 0.94158554 | 1 |
| 44  | 0.17883219 | 0.87974066 | 0.6262626  | 0.94014835 | 1 |
| 80  | 0.15081628 | 0.8793639  | 0.6471278  | 0.9377284  | 1 |
| 22  | 0.21791755 | 0.8775641  | 0.62702703 | 0.9381996  | 1 |
| 28  | 0.1984818  | 0.87326366 | 0.6156863  | 0.94351274 | 1 |
| 15  | 0.24236672 | 0.87241083 | 0.62767476 | 0.9420083  | 1 |
| 21  | 0.21978226 | 0.8715709  | 0.6263587  | 0.9405591  | 1 |
| 18  | 0.23051237 | 0.86864716 | 0.60982656 | 0.9431821  | 1 |
| 31  | 0.19121367 | 0.86840725 | 0.636129   | 0.9405954  | 1 |
| 31  | 0.19348724 | 0.86814505 | 0.63974357 | 0.9380451  | 1 |
| 16  | 0.23626263 | 0.8656074  | 0.62215906 | 0.9400585  | 1 |
| 80  | 0.14930527 | 0.8589078  | 0.6666667  | 0.95000416 | 1 |
| 15  | 0.2413927  | 0.8584768  | 0.6450216  | 0.94780535 | 1 |
| 50  | 0.16222312 | 0.85457635 | 0.65411764 | 0.9521862  | 1 |
| 26  | 0.1985757  | 0.84823066 | 0.64658636 | 0.9612081  | 1 |
| 22  | 0.20878877 | 0.8465876  | 0.664042   | 0.96127063 | 1 |
| 62  | 0.15669005 | 0.845516   | 0.70734596 | 0.96024066 | 1 |
| 50  | 0.16336797 | 0.840347   | 0.68349755 | 0.96696645 | 1 |
| 15  | 0.23630656 | 0.8381592  | 0.6642857  | 0.9680765  | 1 |
| 26  | 0.19308712 | 0.83633727 | 0.67287236 | 0.9683854  | 1 |
| 21  | 0.21179555 | 0.83611965 | 0.6689847  | 0.96576786 | 1 |
| 33  | 0.18222107 | 0.8348633  | 0.6770428  | 0.9649563  | 1 |
| 62  | 0.15389101 | 0.8259392  | 0.7017964  | 0.97813106 | 1 |
| 22  | 0.20029706 | 0.8249668  | 0.69012177 | 0.9768791  | 1 |
| 28  | 0.18928504 | 0.82491153 | 0.6871009  | 0.97394973 | 1 |
| 21  | 0.20594162 | 0.8182467  | 0.703504   | 0.98271286 | 1 |
| 124 | 0.13127679 | 0.8163627  | 0.74172187 | 0.9830443  | 1 |
| 16  | 0.22294717 | 0.8160782  | 0.6925247  | 0.9804741  | 1 |
| 15  | 0.22494577 | 0.81572187 | 0.68945867 | 0.97810686 | 1 |
| 17  | 0.21984762 | 0.81445926 | 0.69498605 | 0.9772702  | 1 |
| 19  | 0.21126087 | 0.81115955 | 0.7144809  | 0.9801747  | 1 |
| 18  | 0.21141334 | 0.80777043 | 0.72182596 | 0.98306704 | 1 |
| 18  | 0.20769592 | 0.8047134  | 0.6802817  | 0.98528314 | 1 |
| 76  | 0.14134002 | 0.8033425  | 0.7583815  | 0.9846494  | 1 |
| 48  | 0.15540321 | 0.80312157 | 0.72397095 | 0.98209846 | 1 |
| 42  | 0.1615764  | 0.79840636 | 0.7465668  | 0.98711324 | 1 |
| 15  | 0.22454917 | 0.79554355 | 0.72527474 | 0.9888712  | 1 |
| 27  | 0.18617398 | 0.7945202  | 0.7198953  | 0.9877158  | 1 |

|     |            |            |            |            |   |
|-----|------------|------------|------------|------------|---|
| 17  | 0.21573032 | 0.7941429  | 0.74089634 | 0.9854175  | 1 |
| 18  | 0.20826952 | 0.7935168  | 0.7299169  | 0.9834444  | 1 |
| 55  | 0.14919901 | 0.79251057 | 0.74608904 | 0.98208183 | 1 |
| 64  | 0.1451077  | 0.78914297 | 0.76566124 | 0.98507094 | 1 |
| 48  | 0.15250191 | 0.7833031  | 0.7689487  | 0.9916878  | 1 |
| 16  | 0.21628852 | 0.7830256  | 0.72316384 | 0.9892561  | 1 |
| 49  | 0.15269476 | 0.78135145 | 0.752754   | 0.98900294 | 1 |
| 18  | 0.20497094 | 0.78055423 | 0.7764706  | 0.9873755  | 1 |
| 76  | 0.13847208 | 0.7800559  | 0.7769953  | 0.9853408  | 1 |
| 71  | 0.1389194  | 0.779658   | 0.7866354  | 0.9831363  | 1 |
| 128 | 0.12518975 | 0.7772986  | 0.8039867  | 0.9840795  | 1 |
| 47  | 0.1540791  | 0.77669346 | 0.7551515  | 0.9821901  | 1 |
| 21  | 0.19279161 | 0.775526   | 0.7539474  | 0.9811139  | 1 |
| 16  | 0.21186568 | 0.77259034 | 0.7513812  | 0.9829762  | 1 |
| 25  | 0.18517256 | 0.7670108  | 0.75753605 | 0.988988   | 1 |
| 19  | 0.19947955 | 0.7625976  | 0.7462483  | 0.993014   | 1 |
| 115 | 0.12422279 | 0.7599046  | 0.8142381  | 0.9941879  | 1 |
| 45  | 0.15241507 | 0.75751054 | 0.7939394  | 0.99505484 | 1 |
| 55  | 0.14262395 | 0.7564799  | 0.8019208  | 0.99376667 | 1 |
| 21  | 0.1914486  | 0.75611037 | 0.7537012  | 0.99150145 | 1 |
| 15  | 0.2129824  | 0.75436264 | 0.77730495 | 0.9913302  | 1 |
| 16  | 0.20587367 | 0.7509561  | 0.7916667  | 0.9934612  | 1 |
| 81  | 0.13263923 | 0.74950194 | 0.82790697 | 0.99278086 | 1 |
| 25  | 0.17719817 | 0.74689454 | 0.7966321  | 0.9936676  | 1 |
| 17  | 0.19954382 | 0.74654627 | 0.79490805 | 0.991389   | 1 |
| 16  | 0.20328386 | 0.7462385  | 0.7688022  | 0.98904985 | 1 |
| 16  | 0.20412163 | 0.7437691  | 0.7716312  | 0.98995763 | 1 |
| 46  | 0.14562613 | 0.7435464  | 0.8056235  | 0.98752743 | 1 |
| 60  | 0.13721737 | 0.7406928  | 0.8192771  | 0.988831   | 1 |
| 31  | 0.16459693 | 0.73935705 | 0.76804125 | 0.9879965  | 1 |
| 48  | 0.14546615 | 0.738902   | 0.82822084 | 0.9859286  | 1 |
| 70  | 0.13263299 | 0.7379381  | 0.8364269  | 0.9845272  | 1 |
| 17  | 0.19763696 | 0.7362492  | 0.7849779  | 0.98414594 | 1 |
| 31  | 0.1625235  | 0.7345663  | 0.7936925  | 0.983807   | 1 |
| 15  | 0.20373668 | 0.73396254 | 0.79490805 | 0.98193455 | 1 |
| 33  | 0.15978754 | 0.7314696  | 0.81036663 | 0.98278123 | 1 |
| 26  | 0.17192115 | 0.7310164  | 0.8104839  | 0.9807257  | 1 |
| 41  | 0.15110394 | 0.7306203  | 0.81077695 | 0.97858214 | 1 |
| 15  | 0.20430371 | 0.7284111  | 0.8133903  | 0.97899294 | 1 |
| 32  | 0.15808913 | 0.72820234 | 0.80100757 | 0.97666085 | 1 |
| 32  | 0.16103607 | 0.7247302  | 0.82474226 | 0.97876495 | 1 |
| 39  | 0.1498031  | 0.7240527  | 0.8329146  | 0.97708315 | 1 |

|     |            |            |            |            |   |
|-----|------------|------------|------------|------------|---|
| 19  | 0.18677631 | 0.7222016  | 0.8118812  | 0.9769083  | 1 |
| 15  | 0.20078121 | 0.72077906 | 0.82327586 | 0.9762391  | 1 |
| 34  | 0.15471898 | 0.7186729  | 0.82156134 | 0.97636193 | 1 |
| 85  | 0.12267927 | 0.71856064 | 0.8493627  | 0.97395694 | 1 |
| 27  | 0.1649248  | 0.7176295  | 0.82564104 | 0.97255635 | 1 |
| 16  | 0.19542815 | 0.7154097  | 0.81601125 | 0.97291875 | 1 |
| 23  | 0.1721985  | 0.7151204  | 0.81038964 | 0.97075015 | 1 |
| 25  | 0.17064363 | 0.7119831  | 0.8246073  | 0.97215205 | 1 |
| 22  | 0.1763401  | 0.7107837  | 0.8218997  | 0.97116536 | 1 |
| 16  | 0.19416444 | 0.7102324  | 0.7943662  | 0.9693813  | 1 |
| 39  | 0.14860147 | 0.7094213  | 0.8493827  | 0.96794724 | 1 |
| 121 | 0.11332936 | 0.70858395 | 0.88241637 | 0.9664358  | 1 |
| 35  | 0.14850122 | 0.6969799  | 0.85125    | 0.97801197 | 1 |
| 31  | 0.15615638 | 0.6961879  | 0.86153847 | 0.97631615 | 1 |
| 25  | 0.16464874 | 0.69467497 | 0.8512064  | 0.9755555  | 1 |
| 36  | 0.14593013 | 0.69253975 | 0.86185044 | 0.9754936  | 1 |
| 59  | 0.1287717  | 0.69205034 | 0.86690223 | 0.97356635 | 1 |
| 59  | 0.12733749 | 0.68970597 | 0.86341465 | 0.97386634 | 1 |
| 74  | 0.12141975 | 0.68387216 | 0.87822014 | 0.9779148  | 1 |
| 42  | 0.13930854 | 0.6808846  | 0.86177886 | 0.9787489  | 1 |
| 40  | 0.14029315 | 0.6790681  | 0.87044024 | 0.97829056 | 1 |
| 22  | 0.16278222 | 0.67701626 | 0.86950547 | 0.9780896  | 1 |
| 27  | 0.15560351 | 0.6722795  | 0.86577183 | 0.9807531  | 1 |
| 17  | 0.17808639 | 0.6688225  | 0.8633721  | 0.9819226  | 1 |
| 22  | 0.1674963  | 0.66839147 | 0.87217045 | 0.97993004 | 1 |
| 18  | 0.17281955 | 0.65942055 | 0.84016395 | 0.9868157  | 1 |
| 40  | 0.13967344 | 0.6588713  | 0.87882495 | 0.98495317 | 1 |
| 27  | 0.1463576  | 0.65336084 | 0.87630206 | 0.98766655 | 1 |
| 24  | 0.15591967 | 0.6492216  | 0.89659685 | 0.98926944 | 1 |
| 17  | 0.17449369 | 0.644812   | 0.8707865  | 0.99100214 | 1 |
| 24  | 0.15342881 | 0.63093257 | 0.90422535 | 1          | 1 |
| 32  | 0.13508567 | 0.63069606 | 0.90697676 | 0.99881685 | 1 |
| 23  | 0.15336974 | 0.62822646 | 0.89145184 | 0.9985005  | 1 |
| 31  | 0.13675834 | 0.6193852  | 0.92408377 | 1          | 1 |
| 53  | 0.11726195 | 0.6192505  | 0.930622   | 1          | 1 |
| 40  | 0.12768468 | 0.6142732  | 0.92541087 | 1          | 1 |
| 19  | 0.15851043 | 0.61419815 | 0.9222065  | 1          | 1 |
| 33  | 0.1330757  | 0.6105226  | 0.9261577  | 1          | 1 |
| 54  | 0.11602078 | 0.60670084 | 0.9356015  | 1          | 1 |
| 21  | 0.15268365 | 0.6046376  | 0.9175532  | 1          | 1 |
| 89  | 0.1038798  | 0.6014706  | 0.95591646 | 1          | 1 |
| 24  | 0.1434011  | 0.5980918  | 0.90957445 | 1          | 1 |



|    |            |            |            |            |   |
|----|------------|------------|------------|------------|---|
| 19 | 0.15650205 | 0.59784603 | 0.9192463  | 0.99846095 | 1 |
| 34 | 0.1296969  | 0.5968647  | 0.9323797  | 0.996787   | 1 |
| 56 | 0.11281353 | 0.5953156  | 0.93276286 | 0.9955768  | 1 |
| 27 | 0.13432649 | 0.591753   | 0.9299611  | 0.9956786  | 1 |
| 25 | 0.13837253 | 0.5859421  | 0.9458388  | 0.9972617  | 1 |
| 22 | 0.1440765  | 0.5822536  | 0.93157893 | 0.9973498  | 1 |
| 25 | 0.13835394 | 0.5777457  | 0.9474376  | 0.99776673 | 1 |
| 70 | 0.10204525 | 0.5667882  | 0.96740395 | 1          | 1 |
| 51 | 0.10902666 | 0.5654997  | 0.9633252  | 1          | 1 |
| 27 | 0.12788458 | 0.5569217  | 0.9612984  | 1          | 1 |
| 34 | 0.12093828 | 0.5564851  | 0.96050954 | 1          | 1 |
| 26 | 0.13014169 | 0.55532926 | 0.9497908  | 0.9990367  | 1 |
| 18 | 0.14675395 | 0.54753685 | 0.96358544 | 1          | 1 |
| 17 | 0.14321113 | 0.5464895  | 0.95633805 | 0.9989085  | 1 |
| 19 | 0.14348175 | 0.54584265 | 0.9585635  | 0.99693274 | 1 |
| 75 | 0.09529258 | 0.54565156 | 0.9726841  | 0.9947421  | 1 |
| 17 | 0.14497897 | 0.54229766 | 0.95014244 | 0.9940319  | 1 |
| 17 | 0.14485876 | 0.5310498  | 0.95428574 | 0.9969325  | 1 |
| 17 | 0.13955809 | 0.5233509  | 0.96478873 | 0.9979268  | 1 |
| 84 | 0.08906569 | 0.51698947 | 0.97949886 | 0.99815005 | 1 |
| 22 | 0.12740615 | 0.5090986  | 0.96703297 | 0.9987938  | 1 |
| 54 | 0.09775419 | 0.50816154 | 0.9765432  | 0.9968619  | 1 |
| 29 | 0.11214374 | 0.4924476  | 0.98282695 | 0.9997539  | 1 |
| 98 | 0.08279201 | 0.48521054 | 0.98324025 | 0.9994804  | 1 |
| 19 | 0.11804561 | 0.4566923  | 0.989071   | 1          | 1 |
| 18 | 0.12031089 | 0.4519062  | 0.97875357 | 1          | 1 |
| 22 | 0.10665146 | 0.43393576 | 0.9986169  | 1          | 1 |
| 16 | 0.11516635 | 0.42459273 | 0.9971306  | 1          | 1 |
| 25 | 0.09327214 | 0.39275432 | 0.9959623  | 1          | 1 |
| 27 | 0.08849601 | 0.37952638 | 0.99869794 | 1          | 1 |
| 15 | 0.10455372 | 0.37404418 | 1          | 0.99875116 | 1 |

RANK AT MAX LEADING EDGE

424 tags=75%, list=33%, signal=101%  
564 tags=86%, list=44%, signal=135%  
347 tags=79%, list=27%, signal=104%  
564 tags=85%, list=44%, signal=133%  
390 tags=69%, list=30%, signal=92%  
183 tags=94%, list=14%, signal=108%  
543 tags=86%, list=42%, signal=138%  
435 tags=71%, list=34%, signal=99%  
537 tags=84%, list=41%, signal=134%  
263 tags=75%, list=20%, signal=92%  
435 tags=67%, list=34%, signal=92%  
386 tags=56%, list=30%, signal=69%  
263 tags=84%, list=20%, signal=104%  
543 tags=88%, list=42%, signal=145%  
346 tags=91%, list=27%, signal=122%  
537 tags=89%, list=41%, signal=146%  
428 tags=69%, list=33%, signal=98%  
399 tags=92%, list=31%, signal=130%  
543 tags=86%, list=42%, signal=140%  
399 tags=88%, list=31%, signal=125%  
492 tags=74%, list=38%, signal=113%  
543 tags=84%, list=42%, signal=138%  
469 tags=78%, list=36%, signal=117%  
543 tags=87%, list=42%, signal=144%  
614 tags=82%, list=47%, signal=141%  
541 tags=86%, list=42%, signal=141%  
543 tags=83%, list=42%, signal=136%  
543 tags=85%, list=42%, signal=140%  
455 tags=62%, list=35%, signal=87%  
428 tags=73%, list=33%, signal=104%  
397 tags=81%, list=31%, signal=114%  
283 tags=49%, list=22%, signal=59%  
538 tags=66%, list=42%, signal=101%  
397 tags=81%, list=31%, signal=114%  
491 tags=83%, list=38%, signal=129%  
399 tags=94%, list=31%, signal=134%  
389 tags=84%, list=30%, signal=119%  
168 tags=69%, list=13%, signal=78%  
421 tags=94%, list=33%, signal=137%  
408 tags=70%, list=32%, signal=99%  
349 tags=62%, list=27%, signal=82%

213 tags=44%, list=16%, signal=50%  
338 tags=71%, list=26%, signal=95%  
230 tags=65%, list=18%, signal=78%  
408 tags=79%, list=32%, signal=114%  
404 tags=80%, list=31%, signal=114%  
543 tags=78%, list=42%, signal=129%  
271 tags=57%, list=21%, signal=71%  
161 tags=38%, list=12%, signal=42%  
204 tags=42%, list=16%, signal=48%  
570 tags=73%, list=44%, signal=125%  
492 tags=73%, list=38%, signal=116%  
429 tags=69%, list=33%, signal=101%  
613 tags=76%, list=47%, signal=136%  
375 tags=61%, list=29%, signal=84%  
263 tags=42%, list=20%, signal=50%  
349 tags=73%, list=27%, signal=99%  
271 tags=63%, list=21%, signal=79%  
647 tags=100%, list=50%, signal=197%  
526 tags=78%, list=41%, signal=128%  
653 tags=96%, list=50%, signal=190%  
420 tags=78%, list=32%, signal=114%  
250 tags=59%, list=19%, signal=72%  
642 tags=71%, list=50%, signal=130%  
152 tags=41%, list=12%, signal=46%  
430 tags=64%, list=33%, signal=93%  
366 tags=57%, list=28%, signal=78%  
420 tags=80%, list=32%, signal=117%  
424 tags=65%, list=33%, signal=95%  
529 tags=76%, list=41%, signal=126%  
430 tags=54%, list=33%, signal=77%  
263 tags=60%, list=20%, signal=74%  
265 tags=33%, list=20%, signal=36%  
380 tags=45%, list=29%, signal=60%  
555 tags=82%, list=43%, signal=141%  
447 tags=56%, list=35%, signal=81%  
401 tags=69%, list=31%, signal=98%  
690 tags=80%, list=53%, signal=164%  
222 tags=50%, list=17%, signal=60%  
250 tags=34%, list=19%, signal=40%  
327 tags=49%, list=25%, signal=63%  
429 tags=65%, list=33%, signal=96%  
264 tags=48%, list=20%, signal=59%

447 tags=58%, list=35%, signal=85%  
481 tags=63%, list=37%, signal=97%  
477 tags=58%, list=37%, signal=89%  
533 tags=56%, list=41%, signal=87%  
615 tags=71%, list=47%, signal=129%  
425 tags=63%, list=33%, signal=92%  
524 tags=77%, list=40%, signal=128%  
376 tags=43%, list=29%, signal=56%  
272 tags=50%, list=21%, signal=63%  
250 tags=33%, list=19%, signal=37%  
250 tags=41%, list=19%, signal=50%  
523 tags=80%, list=40%, signal=133%  
844 tags=93%, list=65%, signal=252%  
691 tags=85%, list=53%, signal=178%  
769 tags=91%, list=59%, signal=219%  
641 tags=66%, list=49%, signal=120%  
554 tags=70%, list=43%, signal=120%  
518 tags=67%, list=40%, signal=109%  
505 tags=59%, list=39%, signal=94%  
211 tags=29%, list=16%, signal=33%  
249 tags=39%, list=19%, signal=48%  
161 tags=39%, list=12%, signal=44%  
495 tags=52%, list=38%, signal=79%  
389 tags=40%, list=30%, signal=52%  
522 tags=70%, list=40%, signal=115%  
87 tags=31%, list=7%, signal=33%  
421 tags=46%, list=33%, signal=66%  
434 tags=45%, list=34%, signal=64%  
336 tags=46%, list=26%, signal=61%  
596 tags=75%, list=46%, signal=136%  
450 tags=52%, list=35%, signal=77%  
592 tags=66%, list=46%, signal=118%  
463 tags=49%, list=36%, signal=74%  
226 tags=35%, list=17%, signal=42%  
323 tags=32%, list=25%, signal=39%  
159 tags=22%, list=12%, signal=23%  
555 tags=60%, list=43%, signal=103%  
395 tags=49%, list=31%, signal=68%  
354 tags=44%, list=27%, signal=60%  
441 tags=52%, list=34%, signal=78%  
456 tags=55%, list=35%, signal=83%  
189 tags=32%, list=15%, signal=37%

261 tags=33%, list=20%, signal=41%  
534 tags=55%, list=41%, signal=90%  
453 tags=52%, list=35%, signal=79%  
808 tags=95%, list=62%, signal=249%  
227 tags=33%, list=18%, signal=39%  
426 tags=63%, list=33%, signal=92%  
233 tags=27%, list=18%, signal=31%  
414 tags=53%, list=32%, signal=77%  
419 tags=42%, list=32%, signal=60%  
283 tags=33%, list=22%, signal=42%  
356 tags=41%, list=27%, signal=55%  
78 tags=21%, list=6%, signal=22%  
233 tags=25%, list=18%, signal=27%  
301 tags=40%, list=23%, signal=52%  
575 tags=57%, list=44%, signal=100%  
241 tags=36%, list=19%, signal=43%  
271 tags=38%, list=21%, signal=47%  
601 tags=62%, list=46%, signal=113%  
456 tags=55%, list=35%, signal=84%  
259 tags=28%, list=20%, signal=34%  
338 tags=47%, list=26%, signal=63%  
523 tags=61%, list=40%, signal=101%  
833 tags=95%, list=64%, signal=263%  
198 tags=24%, list=15%, signal=26%  
428 tags=53%, list=33%, signal=78%  
441 tags=44%, list=34%, signal=64%  
640 tags=74%, list=49%, signal=144%  
65 tags=22%, list=5%, signal=23%  
647 tags=69%, list=50%, signal=135%  
677 tags=73%, list=52%, signal=150%  
98 tags=20%, list=8%, signal=21%  
585 tags=61%, list=45%, signal=108%  
411 tags=42%, list=32%, signal=58%  
191 tags=25%, list=15%, signal=29%  
367 tags=38%, list=28%, signal=51%  
176 tags=26%, list=14%, signal=30%  
518 tags=53%, list=40%, signal=86%  
759 tags=79%, list=59%, signal=186%  
468 tags=63%, list=36%, signal=97%  
581 tags=52%, list=45%, signal=91%  
198 tags=27%, list=15%, signal=31%  
828 tags=84%, list=64%, signal=218%

526 tags=49%, list=41%, signal=79%  
237 tags=33%, list=18%, signal=40%  
820 tags=88%, list=63%, signal=234%  
140 tags=23%, list=11%, signal=25%  
799 tags=80%, list=62%, signal=203%  
494 tags=45%, list=38%, signal=70%  
828 tags=85%, list=64%, signal=223%  
329 tags=47%, list=25%, signal=62%  
198 tags=31%, list=15%, signal=36%  
690 tags=66%, list=53%, signal=133%  
517 tags=53%, list=40%, signal=85%  
184 tags=22%, list=14%, signal=25%  
102 tags=25%, list=8%, signal=27%  
574 tags=59%, list=44%, signal=104%  
814 tags=89%, list=63%, signal=235%  
791 tags=90%, list=61%, signal=229%  
805 tags=78%, list=62%, signal=195%  
273 tags=29%, list=21%, signal=36%  
447 tags=40%, list=35%, signal=53%  
259 tags=31%, list=20%, signal=38%  
419 tags=41%, list=32%, signal=59%  
537 tags=52%, list=41%, signal=85%  
133 tags=18%, list=10%, signal=19%  
159 tags=23%, list=12%, signal=26%  
784 tags=76%, list=61%, signal=186%  
416 tags=44%, list=32%, signal=63%  
426 tags=40%, list=33%, signal=57%  
495 tags=51%, list=38%, signal=81%  
530 tags=60%, list=41%, signal=100%  
262 tags=31%, list=20%, signal=39%  
320 tags=31%, list=25%, signal=40%  
176 tags=27%, list=14%, signal=31%  
426 tags=40%, list=33%, signal=57%  
386 tags=35%, list=30%, signal=47%  
628 tags=68%, list=48%, signal=129%  
583 tags=55%, list=45%, signal=96%  
222 tags=28%, list=17%, signal=33%  
851 tags=86%, list=66%, signal=245%  
433 tags=44%, list=33%, signal=65%  
811 tags=86%, list=63%, signal=227%  
262 tags=26%, list=20%, signal=32%  
457 tags=50%, list=35%, signal=75%

362 tags=35%, list=28%, signal=47%  
599 tags=54%, list=46%, signal=93%  
248 tags=31%, list=19%, signal=37%  
565 tags=58%, list=44%, signal=101%  
538 tags=48%, list=42%, signal=79%  
142 tags=19%, list=11%, signal=21%  
789 tags=84%, list=61%, signal=211%  
955 tags=100%, list=74%, signal=374%  
819 tags=86%, list=63%, signal=228%  
433 tags=43%, list=33%, signal=63%  
463 tags=50%, list=36%, signal=77%  
584 tags=54%, list=45%, signal=93%  
439 tags=43%, list=34%, signal=64%  
607 tags=56%, list=47%, signal=102%  
455 tags=42%, list=35%, signal=60%  
433 tags=44%, list=33%, signal=66%  
147 tags=20%, list=11%, signal=22%  
215 tags=33%, list=17%, signal=40%  
277 tags=27%, list=21%, signal=33%  
76 tags=20%, list=6%, signal=21%  
577 tags=55%, list=45%, signal=96%  
448 tags=44%, list=35%, signal=67%  
206 tags=21%, list=16%, signal=24%  
954 tags=97%, list=74%, signal=358%  
955 tags=100%, list=74%, signal=375%  
197 tags=28%, list=15%, signal=32%  
254 tags=27%, list=20%, signal=33%  
571 tags=53%, list=44%, signal=91%  
176 tags=25%, list=14%, signal=28%  
473 tags=43%, list=37%, signal=65%  
89 tags=16%, list=7%, signal=17%  
452 tags=47%, list=35%, signal=71%  
345 tags=33%, list=27%, signal=45%  
54 tags=15%, list=4%, signal=15%  
89 tags=24%, list=7%, signal=25%  
169 tags=25%, list=13%, signal=28%  
690 tags=65%, list=53%, signal=135%  
379 tags=38%, list=29%, signal=53%  
525 tags=52%, list=41%, signal=87%  
203 tags=27%, list=16%, signal=31%  
541 tags=55%, list=42%, signal=91%  
411 tags=34%, list=32%, signal=49%

238 tags=27%, list=18%, signal=32%  
42 tags=14%, list=3%, signal=14%  
542 tags=49%, list=42%, signal=81%  
861 tags=89%, list=66%, signal=260%  
481 tags=41%, list=37%, signal=62%  
955 tags=100%, list=74%, signal=376%  
808 tags=78%, list=62%, signal=200%  
388 tags=34%, list=30%, signal=48%  
159 tags=25%, list=12%, signal=28%  
355 tags=34%, list=27%, signal=45%  
311 tags=27%, list=24%, signal=33%  
176 tags=21%, list=14%, signal=23%  
174 tags=26%, list=13%, signal=30%  
812 tags=86%, list=63%, signal=228%  
373 tags=36%, list=29%, signal=49%  
95 tags=16%, list=7%, signal=16%  
724 tags=68%, list=56%, signal=153%  
730 tags=65%, list=56%, signal=140%  
143 tags=24%, list=11%, signal=26%  
245 tags=24%, list=19%, signal=28%  
264 tags=24%, list=20%, signal=28%  
459 tags=50%, list=35%, signal=76%  
175 tags=21%, list=14%, signal=24%  
250 tags=25%, list=19%, signal=30%  
414 tags=39%, list=32%, signal=55%  
282 tags=29%, list=22%, signal=36%  
98 tags=13%, list=8%, signal=13%  
230 tags=28%, list=18%, signal=33%  
161 tags=22%, list=12%, signal=24%  
379 tags=36%, list=29%, signal=50%  
255 tags=26%, list=20%, signal=32%  
194 tags=22%, list=15%, signal=25%  
43 tags=14%, list=3%, signal=14%  
323 tags=33%, list=25%, signal=44%  
246 tags=25%, list=19%, signal=30%  
445 tags=42%, list=34%, signal=63%  
262 tags=26%, list=20%, signal=32%  
198 tags=20%, list=15%, signal=21%  
250 tags=23%, list=19%, signal=28%  
576 tags=60%, list=44%, signal=106%  
824 tags=89%, list=64%, signal=242%  
725 tags=62%, list=56%, signal=136%



364 tags=33%, list=28%, signal=45%  
194 tags=18%, list=15%, signal=21%  
497 tags=50%, list=38%, signal=80%  
58 tags=12%, list=4%, signal=12%  
226 tags=28%, list=17%, signal=33%  
203 tags=23%, list=16%, signal=26%  
151 tags=16%, list=12%, signal=17%  
816 tags=82%, list=63%, signal=217%  
583 tags=50%, list=45%, signal=89%  
648 tags=67%, list=50%, signal=132%  
412 tags=33%, list=32%, signal=48%  
86 tags=17%, list=7%, signal=18%  
140 tags=16%, list=11%, signal=18%  
197 tags=19%, list=15%, signal=22%  
76 tags=19%, list=6%, signal=20%  
48 tags=10%, list=4%, signal=10%  
367 tags=33%, list=28%, signal=46%  
363 tags=32%, list=28%, signal=43%  
211 tags=23%, list=16%, signal=27%  
682 tags=68%, list=53%, signal=142%  
751 tags=63%, list=58%, signal=143%  
219 tags=22%, list=17%, signal=25%  
273 tags=33%, list=21%, signal=42%  
702 tags=65%, list=54%, signal=140%  
230 tags=24%, list=18%, signal=28%  
479 tags=45%, list=37%, signal=70%  
828 tags=74%, list=64%, signal=196%  
783 tags=73%, list=60%, signal=181%  
54 tags=11%, list=4%, signal=11%  
595 tags=52%, list=46%, signal=95%  
178 tags=16%, list=14%, signal=17%  
200 tags=25%, list=15%, signal=29%  
393 tags=40%, list=30%, signal=57%  
356 tags=35%, list=27%, signal=48%  
751 tags=68%, list=58%, signal=160%  
200 tags=22%, list=15%, signal=26%  
584 tags=56%, list=45%, signal=100%  
433 tags=38%, list=33%, signal=54%  
228 tags=21%, list=18%, signal=24%  
273 tags=24%, list=21%, signal=29%  
220 tags=27%, list=17%, signal=32%  
820 tags=78%, list=63%, signal=208%

527 tags=47%, list=41%, signal=78%  
597 tags=50%, list=46%, signal=91%  
542 tags=44%, list=42%, signal=72%  
355 tags=30%, list=27%, signal=39%  
315 tags=25%, list=24%, signal=32%  
288 tags=31%, list=22%, signal=40%  
544 tags=45%, list=42%, signal=74%  
164 tags=22%, list=13%, signal=25%  
828 tags=78%, list=64%, signal=203%  
197 tags=17%, list=15%, signal=19%  
455 tags=36%, list=35%, signal=50%  
483 tags=40%, list=37%, signal=62%  
798 tags=81%, list=62%, signal=208%  
43 tags=13%, list=3%, signal=13%  
752 tags=72%, list=58%, signal=168%  
357 tags=32%, list=28%, signal=43%  
491 tags=39%, list=38%, signal=57%  
356 tags=29%, list=27%, signal=38%  
349 tags=29%, list=27%, signal=38%  
329 tags=33%, list=25%, signal=44%  
771 tags=80%, list=60%, signal=195%  
700 tags=75%, list=54%, signal=161%  
430 tags=37%, list=33%, signal=52%  
93 tags=12%, list=7%, signal=13%  
728 tags=71%, list=56%, signal=159%  
1034 tags=100%, list=80%, signal=490%  
651 tags=56%, list=50%, signal=112%  
76 tags=11%, list=6%, signal=11%  
465 tags=38%, list=36%, signal=57%  
384 tags=32%, list=30%, signal=45%  
615 tags=48%, list=47%, signal=88%  
113 tags=13%, list=9%, signal=13%  
568 tags=59%, list=44%, signal=103%  
727 tags=65%, list=56%, signal=144%  
97 tags=13%, list=7%, signal=14%  
228 tags=21%, list=18%, signal=25%  
179 tags=19%, list=14%, signal=22%  
191 tags=17%, list=15%, signal=19%  
643 tags=67%, list=50%, signal=131%  
169 tags=16%, list=13%, signal=18%  
430 tags=38%, list=33%, signal=55%  
508 tags=41%, list=39%, signal=65%

215 tags=21%, list=17%, signal=25%  
1037 tags=100%, list=80%, signal=496%  
248 tags=24%, list=19%, signal=28%  
667 tags=58%, list=52%, signal=111%  
514 tags=48%, list=40%, signal=78%  
456 tags=44%, list=35%, signal=67%  
571 tags=52%, list=44%, signal=92%  
377 tags=28%, list=29%, signal=39%  
426 tags=36%, list=33%, signal=53%  
295 tags=25%, list=23%, signal=32%  
781 tags=72%, list=60%, signal=175%  
159 tags=12%, list=12%, signal=13%  
1020 tags=94%, list=79%, signal=432%  
39 tags=10%, list=3%, signal=10%  
226 tags=20%, list=17%, signal=24%  
717 tags=61%, list=55%, signal=133%  
111 tags=12%, list=9%, signal=12%  
991 tags=92%, list=77%, signal=372%  
489 tags=36%, list=38%, signal=55%  
176 tags=17%, list=14%, signal=19%  
27 tags=8%, list=2%, signal=7%  
583 tags=50%, list=45%, signal=89%  
453 tags=37%, list=35%, signal=56%  
782 tags=76%, list=60%, signal=191%  
706 tags=64%, list=55%, signal=138%  
362 tags=33%, list=28%, signal=46%  
575 tags=50%, list=44%, signal=87%  
607 tags=48%, list=47%, signal=89%  
419 tags=33%, list=32%, signal=48%  
141 tags=18%, list=11%, signal=20%  
463 tags=38%, list=36%, signal=57%  
257 tags=22%, list=20%, signal=27%  
466 tags=43%, list=36%, signal=67%  
977 tags=90%, list=75%, signal=359%  
348 tags=28%, list=27%, signal=37%  
150 tags=15%, list=12%, signal=16%  
643 tags=58%, list=50%, signal=113%  
473 tags=39%, list=37%, signal=60%  
43 tags=7%, list=3%, signal=7%  
528 tags=43%, list=41%, signal=71%  
747 tags=60%, list=58%, signal=131%  
677 tags=58%, list=52%, signal=120%

997 tags=95%, list=77%, signal=406%  
491 tags=38%, list=38%, signal=60%  
133 tags=13%, list=10%, signal=13%  
102 tags=11%, list=8%, signal=12%  
420 tags=32%, list=32%, signal=46%  
102 tags=14%, list=8%, signal=15%  
689 tags=60%, list=53%, signal=126%  
433 tags=34%, list=33%, signal=49%  
923 tags=86%, list=71%, signal=289%  
737 tags=63%, list=57%, signal=143%  
800 tags=68%, list=62%, signal=172%  
1058 tags=96%, list=82%, signal=515%  
512 tags=44%, list=40%, signal=72%  
298 tags=24%, list=23%, signal=30%  
364 tags=32%, list=28%, signal=43%  
428 tags=29%, list=33%, signal=41%  
801 tags=71%, list=62%, signal=183%  
106 tags=12%, list=8%, signal=13%  
660 tags=53%, list=51%, signal=107%  
338 tags=25%, list=26%, signal=32%  
986 tags=91%, list=76%, signal=375%  
336 tags=26%, list=26%, signal=34%  
588 tags=48%, list=45%, signal=86%  
304 tags=20%, list=23%, signal=25%  
12 tags=5%, list=1%, signal=5%  
895 tags=83%, list=69%, signal=266%  
779 tags=68%, list=60%, signal=168%  
15 tags=6%, list=1%, signal=6%  
412 tags=28%, list=32%, signal=40%  
700 tags=56%, list=54%, signal=118%  
42 tags=7%, list=3%, signal=7%
