# Supplementary material
Source: PubMed Central journal article supplement (PMC5415415)
Supplement: NIHMS843993-supplement-8.pdf [file NIHMS843993-supplement-8.pdf]

NAME

KOBAYASHI\_EGFR\_SIGNALING\_24HR\_DN  
GOBERT\_OLIGODENDROCYTE\_DIFFERENTIATION\_UP  
BURTON\_ADIPOGENESIS\_3  
CHANG\_CYCLING\_GENES  
ROSTY\_CERVICAL\_CANCER\_PROLIFERATION\_CLUSTER  
LE\_EGR2\_TARGETS\_UP  
KONG\_E2F3\_TARGETS  
SARRIO\_EPITHELIAL\_MESENCHYMAL\_TRANSITION\_UP  
PUJANA\_BRCA2\_PCC\_NETWORK  
DUTERTRE ESTRADIOL\_RESPONSE\_24HR\_UP  
POOLA\_INVASIVE\_BREAST\_CANCER\_UP  
MARSON\_BOUND\_BY\_E2F4\_UNSTIMULATED  
SOTIRIOU\_BREAST\_CANCER\_GRADE\_1\_VS\_3\_UP  
HOFFMANN\_LARGE\_TO\_SMALL\_PRE\_BII\_LYMPHOCYTE\_UP  
ZHANG\_TLX\_TARGETS\_60HR\_DN  
CHIANG\_LIVER\_CANCER\_SUBCLASS\_PROLIFERATION\_UP  
CROONQUIST\_IL6\_DEPRIVATION\_DN  
ZHOU\_CELL\_CYCLE\_GENES\_IN\_IR\_RESPONSE\_24HR  
PUJANA\_ATM\_PCC\_NETWORK  
QI\_PLASMACYTOMA\_UP  
REACTOME\_CELL\_CYCLE  
GOLDRATH\_ANTIGEN\_RESPONSE  
MORI\_IMMATURE\_B\_LYMPHOCYTE\_DN  
BASAKI\_YBX1\_TARGETS\_UP  
BENPORATH\_CYCLING\_GENES  
MORI\_LARGE\_PRE\_BII\_LYMPHOCYTE\_UP  
ISHIDA\_E2F\_TARGETS  
CROONQUIST\_NRAS\_SIGNALING\_DN  
REACTOME\_DNA\_REPLICATION  
REACTOME\_CELL\_CYCLE\_MITOTIC  
CAIRO\_HEPATOBLASTOMA\_CLASSES\_UP  
WHITEFORD\_PEDIATRIC\_CANCER\_MARKERS  
PUJANA\_XPRSS\_INT\_NETWORK  
ZHOU\_CELL\_CYCLE\_GENES\_IN\_IR\_RESPONSE\_6HR  
BLUM\_RESPONSE\_TO\_SALIRASIB\_DN  
KANG\_DOXORUBICIN\_RESISTANCE\_UP  
WU\_APOPTOSIS\_BY\_CDKN1A\_VIA\_TP53  
REACTOME\_MITOTIC\_M\_M\_G1\_PHASES  
SHEDDEN\_LUNG\_CANCER\_POOR\_SURVIVAL\_A6  
FUJII\_YBX1\_TARGETS\_DN  
CHIARADONNA\_NEOPLASTIC\_TRANSFORMATION\_KRAS\_UP

REACTOME\_IMMUNE\_SYSTEM  
ODONNELL\_TFRC\_TARGETS\_DN  
CROONQUIST\_NRAS\_VS\_STROMAL\_STIMULATION\_DN  
MARKEY\_RB1\_ACUTE\_LOF\_DN  
PUJANA\_BRCA1\_PCC\_NETWORK  
NAKAYAMA\_SOFT\_TISSUE\_TUMORS\_PCA2\_UP  
PID\_BCR\_5PATHWAY  
HELLER\_SILENCED\_BY\_METHYLATION\_UP  
BASSO\_CD40\_SIGNALING\_UP  
MISSIAGLIA\_REGULATED\_BY\_METHYLATION\_DN  
MUELLER\_PLURINET  
RODRIGUES\_THYROID\_CARCINOMA\_ANAPLASTIC\_UP  
SONG\_TARGETS\_OF\_IE86\_CMV\_PROTEIN  
FERREIRA\_EWINGS\_SARCOMA\_UNSTABLE\_VS\_STABLE\_UP  
BIDUS\_METASTASIS\_UP  
RHODES\_UNDIFFERENTIATED\_CANCER  
REN\_BOUND\_BY\_E2F  
KAUFFMANN\_DNA\_REPLICATION\_GENES  
BENPORATH\_PROLIFERATION  
MCLACHLAN\_DENTAL\_CARIES\_DN  
KAUFFMANN\_DNA\_REPAIR\_GENES  
PUJANA\_CHEK2\_PCC\_NETWORK  
REACTOME\_S\_PHASE  
RIZ\_ERYTHROID\_DIFFERENTIATION  
TANG\_SENESCENCE\_TP53\_TARGETS\_DN  
HORIUCHI\_WTAP\_TARGETS\_DN  
WHITFIELD\_CELL\_CYCLE\_LITERATURE  
MCLACHLAN\_DENTAL\_CARIES\_UP  
MORI\_LARGE\_PRE\_BII\_LYMPHOCYTE\_DN  
GAVIN\_FOXP3\_TARGETS\_CLUSTER\_P6  
HADDAD\_B\_LYMPHOCYTE\_PROGENITOR  
LI\_WILMS\_TUMOR\_VS\_FETAL\_KIDNEY\_1\_DN  
WINNEPENNINCKX\_MELANOMA\_METASTASIS\_UP  
WANG\_RESPONSE\_TO\_GSK3\_INHIBITOR\_SB216763\_DN  
LANDIS\_ERBB2\_BREAST\_TUMORS\_324\_UP  
MORI\_PRE\_BI\_LYMPHOCYTE\_UP  
MORI\_PLASMA\_CELL\_DN  
FEVR\_CTNNB1\_TARGETS\_DN  
PUJANA\_BRCA\_CENTERED\_NETWORK  
BOYAULT\_LIVER\_CANCER\_SUBCLASS\_G23\_UP  
FURUKAWA\_DUSP6\_TARGETS\_PCI35\_DN  
AMUNDSON\_GAMMA\_RADIATION\_RESPONSE

GRAHAM\_NORMAL\_QUIESCENT\_VS\_NORMAL\_DIVIDING\_DN  
DODD\_NASOPHARYNGEAL\_CARCINOMA\_DN  
WHITFIELD\_CELL\_CYCLE\_G2\_M  
MITSIADES\_RESPONSE\_TO\_APLIDIN\_DN  
LEE\_EARLY\_T\_LYMPHOCYTE\_UP  
WIELAND\_UP\_BY\_HBV\_INFECTION  
KEGG\_B\_CELL\_RECEPTOR\_SIGNALING\_PATHWAY  
KAMMINGA\_EZH2\_TARGETS  
PATIL\_LIVER\_CANCER  
MORI\_MATURE\_B\_LYMPHOCYTE\_UP  
FOURNIER\_ACINAR\_DEVELOPMENT\_LATE\_2  
GRAHAM\_CML\_DIVIDING\_VS\_NORMAL\_QUIESCENT\_UP  
REACTOME\_SIGNALING\_BY\_THE\_B\_CELL\_RECEPTOR\_BCR  
ZHENG\_GLIOMASTOMA\_PLASTICITY\_UP  
ZHANG\_TLX\_TARGETS\_36HR\_DN  
CHEMNITZ\_RESPONSE\_TO\_PROSTAGLANDIN\_E2\_UP  
VECCHI\_GASTRIC\_CANCER\_EARLY\_UP  
REACTOME\_CYTOKINE\_SIGNALING\_IN\_IMMUNE\_SYSTEM  
ICHIBA\_GRAFT\_VERSUS\_HOST\_DISEASE\_D7\_UP  
BERENJENO\_TRANSFORMED\_BY\_RHOA\_UP  
SENGUPTA\_NASOPHARYNGEAL\_CARCINOMA\_UP  
KEGG\_CELL\_CYCLE  
MORI\_IMMATURE\_B\_LYMPHOCYTE\_UP  
REACTOME\_MITOTIC\_G1\_G1\_S\_PHASES  
REACTOME\_INTERFERON\_SIGNALING  
RODWELL\_AGING\_KIDNEY\_UP  
MCBRYAN\_PUBERTAL\_BREAST\_4\_5WK\_UP  
RUIZ\_TNC\_TARGETS\_DN  
KLEIN\_PRIMARY\_EFFUSION\_LYMPHOMA\_DN  
REACTOME\_ADAPTIVE\_IMMUNE\_SYSTEM  
PASQUALUCCI\_LYMPHOMA\_BY\_GC\_STAGE\_DN  
ZHANG\_TLX\_TARGETS\_UP  
WALLACE\_PROSTATE\_CANCER\_RACE\_UP  
GARY\_CD5\_TARGETS\_DN  
KINSEY\_TARGETS\_OF\_EWSR1\_FLII\_FUSION\_UP  
LEE\_DIFFERENTIATING\_T\_LYMPHOCYTE  
BENPORATH\_ES\_1  
TOYOTA\_TARGETS\_OF\_MIR34B\_AND\_MIR34C  
HOLLMANN\_APOPTOSIS\_VIA\_CD40\_UP  
CHEN\_METABOLIC\_SYNDROM\_NETWORK  
SMID\_BREAST\_CANCER\_NORMAL\_LIKE\_UP  
SHEPARD\_BMYB\_MORPHOLINO\_DN

SMID\_BREAST\_CANCER\_BASAL\_UP  
JOHNSTONE\_PARVB\_TARGETS\_3\_DN  
ZHANG\_BREAST\_CANCER\_PROGENITORS\_UP  
GAL\_LEUKEMIC\_STEM\_CELL\_DN  
PID\_PDGFBRPATHWAY  
JOHANSSON\_GLIOMAGENESIS\_BY\_PDGF\_UP  
LEE\_LIVER\_CANCER\_SURVIVAL\_DN  
PENG\_RAPAMYCIN\_RESPONSE\_UP  
FLECHNER\_BIOPSY\_KIDNEY\_TRANSPLANT\_REJECTED\_VS\_OK\_UP  
SHEPARD\_CRUSH\_AND\_BURN\_MUTANT\_DN  
NUYTEN\_EZH2\_TARGETS\_DN  
HOFFMANN\_SMALL\_PRE\_BII\_TO\_IMMATURE\_B\_LYMPHOCYTE\_UP  
AFFAR\_YY1\_TARGETS\_DN  
ICHIBA\_GRAFT\_VERSUS\_HOST\_DISEASE\_35D\_UP  
WHITFIELD\_CELL\_CYCLE\_G2  
WANG\_CISPLATIN\_RESPONSE\_AND\_XPC\_UP  
CHICAS\_RB1\_TARGETS\_GROWING  
DAZARD\_RESPONSE\_TO\_UV\_NHEK\_DN  
NEMETH\_INFLAMMATORY\_RESPONSE\_LPS\_UP  
ALCALAY\_AML\_BY\_NPM1\_LOCALIZATION\_DN  
REACTOME\_MITOTIC\_PROMETAPHASE  
SMIRNOV\_RESPONSE\_TO\_IR\_6HR\_DN  
BERTUCCI\_MEDULLARY\_VS\_DUCTAL\_BREAST\_CANCER\_UP  
GRAHAM\_CML\_QUIESCENT\_VS\_NORMAL\_QUIESCENT\_UP  
WONG\_EMBRYONIC\_STEM\_CELL\_CORE  
ODONNELL\_TARGETS\_OF\_MYC\_AND\_TFRC\_DN  
KEGG\_CYTOKINE\_CYTOKINE\_RECEPTOR\_INTERACTION  
PETROVA\_ENDOTHELIUM\_LYMPHATIC\_VS\_BLOOD\_UP  
BROWNE\_HCMV\_INFECTION\_24HR\_UP  
LINDGREN\_BLADDER\_CANCER\_CLUSTER\_3\_UP  
MARTINEZ\_RESPONSE\_TO TRABECTEDIN\_DN  
LINDGREN\_BLADDER\_CANCER\_CLUSTER\_1\_DN  
VANTVEER\_BREAST\_CANCER\_ESR1\_DN  
KORKOLA\_TERATOMA  
MANALO\_HYPOXIA\_DN  
ACEVEDO\_FGFR1\_TARGETS\_IN\_PROSTATE\_CANCER\_MODEL\_UP  
WHITFIELD\_CELL\_CYCLE\_G1\_S  
RASHI\_RESPONSE\_TO\_IONIZING\_RADIATION\_6  
ONDER\_CDH1\_TARGETS\_2\_DN  
MARKEY\_RB1\_ACUTE\_LOF\_UP  
KEGG\_FC\_GAMMA\_R\_MEDIATED\_PHAGOCYTOSIS  
GOTZMANN\_EPITHELIAL\_TO\_MESENCHYMAL\_TRANSITION\_UP

PAL\_PRMT5\_TARGETS\_UP  
LABBE\_WNT3A\_TARGETS\_UP  
HELLER\_HDAC\_TARGETS\_UP  
BOYAULT\_LIVER\_CANCER\_SUBCLASS\_G3\_UP  
GRADE\_COLON\_AND\_RECTAL\_CANCER\_UP  
TARTE\_PLASMA\_CELL\_VS\_PLASMABLAST\_DN  
WHITFIELD\_CELL\_CYCLE\_S  
IZADPANAH\_STEM\_CELL\_ADIPOSE\_VS\_BONE\_UP  
CHICAS\_RB1\_TARGETS\_SENESCENT  
DUTERTRE ESTRADIOL\_RESPONSE\_6HR\_UP  
LEE\_BMP2\_TARGETS\_DN  
KEGG\_CHEMOKINE\_SIGNALING\_PATHWAY  
CUI\_TCF21\_TARGETS\_2\_UP  
HELLER\_HDAC\_TARGETS\_DN  
PENG\_GLUCOSE\_DEPRIVATION\_DN  
RUTELLA\_RESPONSE\_TO\_HGF\_VS\_CSF2RB\_AND\_IL4\_DN  
MARKEY\_RB1\_CHRONIC\_LOF\_UP  
REACTOME\_APOPTOSIS  
CONCANNON\_APOPTOSIS\_BY\_EPOXOMICIN\_DN  
HELLER\_HDAC\_TARGETS\_SILENCED\_BY\_METHYLATION\_DN  
ZAMORA\_NOS2\_TARGETS\_UP  
KEGG\_REGULATION\_OF\_ACTIN\_CYTOSKELETON  
ZHANG\_RESPONSE\_TO\_IKK\_INHIBITOR\_AND\_TNF\_UP  
RODRIGUES\_THYROID\_CARCINOMA\_POORLY\_DIFFERENTIATED\_UP  
BORLAK\_LIVER\_CANCER\_EGF\_UP  
SMID\_BREAST\_CANCER\_LUMINAL\_B\_DN  
WILCOX\_PRESPONSE\_TO\_ROGESTERONE\_UP  
BORCZUK\_MALIGNANT\_MESOTHELIOMA\_UP  
HOSHIDA\_LIVER\_CANCER\_SUBCLASS\_S1  
REACTOME\_INNATE\_IMMUNE\_SYSTEM  
SASAKI\_ADULT\_T\_CELL\_LEUKEMIA  
BASSO\_B\_LYMPHOCYTE\_NETWORK  
CHANDRAN\_METASTASIS\_UP  
OLSSON\_E2F3\_TARGETS\_DN  
KEGG\_LEUKOCYTE\_TRANSENDOTHELIAL\_MIGRATION  
CAIRO\_LIVER\_DEVELOPMENT\_UP  
MARSON\_BOUND\_BY\_FOXP3\_UNSTIMULATED  
GEORGES\_TARGETS\_OF\_MIR192\_AND\_MIR215  
IVANOVA\_HEMATOPOIESIS\_LATE\_PROGENITOR  
LI\_INDUCED\_T\_TO\_NATURAL\_KILLER\_UP  
FOSTER\_TOLERANT\_MACROPHAGE\_DN  
VANTVEER\_BREAST\_CANCER\_METASTASIS\_DN

BOSCO\_ALLERGEN\_INDUCED\_TH2\_ASSOCIATED\_MODULE  
SHEN\_SMARCA2\_TARGETS\_DN  
KIM\_WT1\_TARGETS\_DN  
BHATI\_G2M\_ARREST\_BY\_2METHOXYESTRADIOL\_UP  
PYEON\_CANCER\_HEAD\_AND\_NECK\_VS\_CERVICAL\_UP  
TSAI\_RESPONSE\_TO\_IONIZING\_RADIATION  
MATTIOLI\_MGUS\_VS\_PCL  
HELLER\_HDAC\_TARGETS\_SILENCED\_BY\_METHYLATION\_UP  
LEE\_LIVER\_CANCER\_DENA\_UP  
AMUNDSON\_GENOTOXIC\_SIGNATURE  
BOQUEST\_STEM\_CELL\_DN  
SCIBETTA\_KDM5B\_TARGETS\_DN  
KUMAR\_TARGETS\_OF\_MLL\_AF9\_FUSION  
SASSON\_RESPONSE\_TO\_FORSKOLIN\_DN  
BROCKE\_APOPTOSIS\_REVERSED\_BY\_IL6  
MATSUDA\_NATURAL\_KILLER\_DIFFERENTIATION  
PILON\_KLF1\_TARGETS\_DN  
GROSS\_HYPOXIA\_VIA\_ELK3\_AND\_HIF1A\_DN  
RUTELLA\_RESPONSE\_TO\_HGF\_DN  
KIM\_WT1\_TARGETS\_UP  
SASSON\_RESPONSE\_TO\_GONADOTROPHINS\_DN  
VERHAAK\_GLIOMASTOMA\_NEURAL  
MARTENS\_BOUND\_BY\_PML\_RARA\_FUSION  
CHANG\_CORE\_SERUM\_RESPONSE\_UP  
GRESHOCK\_CANCER\_COPY\_NUMBER\_UP  
YAMAZAKI\_TCEB3\_TARGETS\_UP  
AZARE\_NEOPLASTIC\_TRANSFORMATION\_BY\_STAT3\_DN  
WU\_SILENCED\_BY\_METHYLATION\_IN\_BLADDER\_CANCER  
VERHAAK\_AML\_WITH\_NPM1\_MUTATED\_DN  
YAGI\_AML\_WITH\_T\_8\_21\_TRANSLOCATION  
KINSEY\_TARGETS\_OF\_EWSR1\_FLII\_FUSION\_DN  
SMID\_BREAST\_CANCER\_RELAPSE\_IN\_BONE\_DN  
PID\_CXCR4\_PATHWAY  
LINDGREN\_BLADDER\_CANCER\_CLUSTER\_2B  
DELYS\_THYROID\_CANCER\_UP  
GROSS\_HYPOXIA\_VIA\_ELK3\_UP  
LENAOUR\_DENDRITIC\_CELL\_MATURATION\_DN  
MULLIGHAN\_MLL\_SIGNATURE\_1\_UP  
BILD\_E2F3\_ONCOGENIC\_SIGNATURE  
GARCIA\_TARGETS\_OF\_FL11\_AND\_DAX1\_DN  
SHETH\_LIVER\_CANCER\_VS\_TXNIP\_LOSS\_PAM1  
LEE\_LIVER\_CANCER\_MYC\_E2F1\_UP

MORI\_EMU\_MYC\_LYMPHOMA\_BY\_ONSET\_TIME\_UP  
PETROVA\_ENDOTHELIUM\_LYMPHATIC\_VS\_BLOOD\_DN  
CHICAS\_RB1\_TARGETS\_CONFLUENT  
WEST\_ADRENOCORTICAL\_TUMOR\_UP  
SCHAEFFER\_PROSTATE\_DEVELOPMENT\_6HR\_DN  
OSMAN\_BLADDER\_CANCER\_DN  
DER\_IFN\_GAMMA\_RESPONSE\_UP  
GROSS\_HYPOXIA\_VIA\_ELK3\_DN  
HAHTOLA\_MYCOSIS\_FUNGOIDES\_SKIN\_UP  
AMUNDSON\_POOR\_SURVIVAL\_AFTER\_GAMMA\_RADIATION\_2G  
THUM\_SYSTOLIC\_HEART\_FAILURE\_UP  
KIM\_GLIS2\_TARGETS\_UP  
WIERENGA\_STAT5A\_TARGETS\_DN  
JAATINEN\_HEMATOPOIETIC\_STEM\_CELL\_DN  
DOANE\_RESPONSE\_TO\_ANDROGEN\_DN  
DACOSTA\_UV\_RESPONSE\_VIA\_ERCC3\_DN  
SANA\_RESPONSE\_TO\_IFNG\_DN  
KASLER\_HDAC7\_TARGETS\_1\_UP  
TIEN\_INTESTINE\_PROBIOTICS\_24HR\_UP  
REACTOME\_GPCR\_LIGAND\_BINDING  
RODRIGUES\_NTN1\_TARGETS\_DN  
MULLIGHAN\_MLL\_SIGNATURE\_2\_UP  
PHONG\_TNF\_RESPONSE\_NOT\_VIA\_P38  
RAY\_TUMORIGENESIS\_BY\_ERBB2\_CDC25A\_UP  
LIAO\_METASTASIS  
GENTILE\_UV\_HIGH\_DOSE\_DN  
LIU\_VAV3\_PROSTATE\_CARCINOGENESIS\_UP  
POTTI\_ADRIAMYCIN\_SENSITIVITY  
VERHAAK\_AML\_WITH\_NPM1\_MUTATED\_UP  
RIZKI\_TUMOR\_INVASIVENESS\_3D\_DN  
KEGG\_MAPK\_SIGNALING\_PATHWAY  
ZHU\_CMV\_ALL\_DN  
WU\_CELL\_MIGRATION  
DEMAGALHAES\_AGING\_UP  
SCHUETZ\_BREAST\_CANCER\_DUCTAL\_INVASIVE\_UP  
DEURIG\_T\_CELL\_PROLYMPHOCYTIC\_LEUKEMIA\_UP  
REACTOME\_PLATELET\_ACTIVATION\_SIGNALING\_AND\_AGGREGATION  
SABATES\_COLORECTAL\_ADENOMA\_UP  
ZHENG\_BOUND\_BY\_FOXP3  
SHEDDEN\_LUNG\_CANCER\_GOOD\_SURVIVAL\_A12  
DACOSTA\_UV\_RESPONSE\_VIA\_ERCC3\_COMMON\_DN  
GRUETZMANN\_PANCREATIC\_CANCER\_UP

TSENG\_IRS1\_TARGETS\_UP  
DAIRKEE\_CANCER\_PRONE\_RESPONSE\_BPA\_E2  
MORI\_MATURE\_B\_LYMPHOCYTE\_DN  
BROWNE\_HCMV\_INFECTION\_14HR\_DN  
SENESE\_HDAC1\_TARGETS\_UP  
FERRANDO\_T\_ALL\_WITH\_MLL\_ENL\_FUSION\_DN  
BRUINS\_UVC\_RESPONSE\_VIA\_TP53\_GROUP\_D  
PHONG\_TNF\_RESPONSE\_VIA\_P38\_PARTIAL  
ZWANG\_CLASS\_1\_TRANSIENTLY\_INDUCED\_BY\_EGF  
VART\_KSHV\_INFECTION\_ANGIOGENIC\_MARKERS\_UP  
MEISSNER\_BRAIN\_HCP\_WITH\_H3K4ME3\_AND\_H3K27ME3  
ZHOU\_INFLAMMATORY\_RESPONSE\_LPS\_UP  
BENPORATH\_NOS\_TARGETS  
KIM\_WT1\_TARGETS\_12HR\_DN  
REACTOME\_HEMOSTASIS  
ZHOU\_INFLAMMATORY\_RESPONSE\_LIVE\_UP  
SENGUPTA\_NASOPHARYNGEAL\_CARCINOMA\_DN  
BILD\_HRAS\_ONCOGENIC\_SIGNATURE  
RICKMAN\_METASTASIS\_DN  
BASSO\_CD40\_SIGNALING\_DN  
MARSON\_BOUND\_BY\_FOXP3\_STIMULATED  
MCBRYAN\_PUBERTAL\_BREAST\_6\_7WK\_DN  
TONKS\_TARGETS\_OF\_RUNX1\_RUNX1T1\_FUSION\_HSC\_DN  
CHYLA\_CBFA2T3\_TARGETS\_UP  
GRADE\_COLON\_CANCER\_UP  
GAVIN\_FOXP3\_TARGETS\_CLUSTER\_P3  
RASHI\_RESPONSE\_TO\_IONIZING\_RADIATION\_2  
JACKSON\_DNMT1\_TARGETS\_UP  
HUANG\_GATA2\_TARGETS\_UP  
THEILGAARD\_NEUTROPHIL\_AT\_SKIN\_WOUND\_DN  
ZHU\_CMV\_24\_HR\_DN  
JISON\_SICKLE\_CELL\_DISEASE\_UP  
PROVENZANI\_METASTASIS\_DN  
DEURIG\_T\_CELL\_PROLYMPHOCYTIC\_LEUKEMIA\_DN  
KIM\_WT1\_TARGETS\_8HR\_UP  
KOBAYASHI\_EGFR\_SIGNALING\_24HR\_UP  
CHARAFE\_BREAST\_CANCER\_LUMINAL\_VS\_BASAL\_DN  
HAMAI\_APOPTOSIS\_VIA\_TRAIL\_UP  
LEI\_MYB\_TARGETS  
MARTORIATI\_MDM4\_TARGETS\_FETAL\_LIVER\_DN  
BENPORATH\_OCT4\_TARGETS  
BLALOCK\_ALZHEIMERS\_DISEASE\_UP



KEEN\_RESPONSE\_TO\_ROSIGLITAZONE\_DN  
BROWNE\_HCMV\_INFECTION\_48HR\_UP  
SPIELMAN\_LYMPHOBLAST\_EUROPEAN\_VS\_ASIAN\_UP  
LINDVALL\_IMMORTALIZED\_BY\_TERT\_DN  
LABBE\_TARGETS\_OF\_TGFB1\_AND\_WNT3A\_DN  
NUYTEN\_NIPP1\_TARGETS\_DN  
KEGG\_CALCIIUM\_SIGNALING\_PATHWAY  
BLALOCK\_ALZHEIMERS\_DISEASE\_INCIPIENT\_UP  
WANG\_ESOPHAGUS\_CANCER\_VS\_NORMAL\_UP  
LEE\_LIVER\_CANCER\_E2F1\_UP  
COLINA\_TARGETS\_OF\_4EBP1\_AND\_4EBP2  
KIM\_WT1\_TARGETS\_12HR\_UP  
SENESE\_HDAC1\_AND\_HDAC2\_TARGETS\_UP  
REACTOME\_G\_ALPHA\_I\_SIGNALLING\_EVENTS  
NUYTEN\_EZH2\_TARGETS\_UP  
DARWICHE\_PAPILLOMA\_RISK\_LOW\_DN  
WELCSH\_BRCA1\_TARGETS\_DN  
PLASARI\_TGFB1\_TARGETS\_10HR\_UP  
MARTENS\_TRETINOIN\_RESPONSE\_DN  
SHETH\_LIVER\_CANCER\_VS\_TXNIP\_LOSS\_PAM2  
SMIRNOV\_CIRCULATING\_ENDOTHELIOCYTES\_IN\_CANCER\_UP  
RIZKI\_TUMOR\_INVASIVENESS\_3D\_UP  
WANG\_RESPONSE\_TO\_GSK3\_INHIBITOR\_SB216763\_UP  
VERHAAK\_GLIOMASTOMA\_PRONEURAL  
ROZANOV\_MMP14\_TARGETS\_UP  
SABATES\_COLORECTAL\_ADENOMA\_DN  
COLDREN\_GEFITINIB\_RESISTANCE\_DN  
WONG\_ADULT\_TISSUE\_STEM\_MODULE  
AMIT\_EGF\_RESPONSE\_480\_HELA  
KOKKINAKIS\_METHIONINE\_DEPRIVATION\_96HR\_UP  
UDAYAKUMAR\_MED1\_TARGETS\_DN  
BUYTAERT\_PHOTODYNAMIC\_THERAPY\_STRESS\_DN  
HUMMERICH\_SKIN\_CANCER\_PROGRESSION\_UP  
TARTE\_PLASMA\_CELL\_VS\_PLASMABLAST\_UP  
CHIANG\_LIVER\_CANCER\_SUBCLASS\_CTNNB1\_DN  
PENG\_LEUCINE\_DEPRIVATION\_UP  
SERVITJA\_ISLET\_HNF1A\_TARGETS\_UP  
PASQUALUCCI\_LYMPHOMA\_BY\_GC\_STAGE\_UP  
BENPORATH\_MYC\_TARGETS\_WITH\_EBOX  
MASSARWEH\_TAMOXIFEN\_RESISTANCE\_DN  
MARTINEZ\_RB1\_AND\_TP53\_TARGETS\_DN  
BROWNE\_HCMV\_INFECTION\_24HR\_DN

AMUNDSON\_POOR\_SURVIVAL\_AFTER\_GAMMA\_RADIATION\_8G  
KAAB\_HEART\_ATRIUM\_VS\_VENTRICLE\_UP  
BOYLAN\_MULTIPLE\_MYELOMA\_C\_D\_DN  
JOHNSTONE\_PARVB\_TARGETS\_2\_UP  
BROWNE\_HCMV\_INFECTION\_4HR\_DN  
BROWNE\_HCMV\_INFECTION\_16HR\_UP  
CHIARADONNA\_NEOPLASTIC\_TRANSFORMATION\_CDC25\_UP  
PEDRIOLI\_MIR31\_TARGETS\_UP  
CREIGHTON\_ENDOCRINE\_THERAPY\_RESISTANCE\_1  
ZHONG\_SECRETOME\_OF\_LUNG\_CANCER\_AND\_MACROPHAGE  
LINDSTEDT\_DENDRITIC\_CELL\_MATURATION\_D  
BHATTACHARYA\_EMBRYONIC\_STEM\_CELL  
ZWANG\_DOWN\_BY\_2ND\_EGF\_PULSE  
MARKEY\_RB1\_CHRONIC\_LOF\_DN  
YAGI\_AML\_WITH\_11Q23\_REARRANGED  
ZHONG\_RESPONSE\_TO\_AZACITIDINE\_AND\_TSA\_UP  
MILI\_PSEUDOPODIA\_HAPTOTAXIS\_DN  
DANG\_MYC\_TARGETS\_UP  
MIYAGAWA\_TARGETS\_OF\_EWSR1\_ETS\_FUSIONS\_UP  
HILLION\_HMGA1\_TARGETS  
NIKOLSKY\_BREAST\_CANCER\_17Q21\_Q25\_AMPLICON  
CHARAFE\_BREAST\_CANCER\_LUMINAL\_VS\_MESENCHYMAL\_DN  
KOKKINAKIS\_METHIONINE\_DEPRIVATION\_48HR\_UP  
KUMAR\_PATHOGEN\_LOAD\_BY\_MACROPHAGES  
PASINI\_SUZ12\_TARGETS\_DN  
BOYLAN\_MULTIPLE\_MYELOMA\_C\_D\_UP  
PROVENZANI\_METASTASIS\_UP  
ACEVEDO\_NORMAL\_TISSUE\_ADJACENT\_TO\_LIVER\_TUMOR\_UP  
DANG\_REGULATED\_BY\_MYC\_DN  
SANA\_TNF\_SIGNALING\_DN  
RAMALHO\_STEMNESS\_DN  
WANG\_LMO4\_TARGETS\_DN  
ALCALA\_APOPTOSIS  
UDAYAKUMAR\_MED1\_TARGETS\_UP  
WOOD\_EBV\_EBNA1\_TARGETS\_UP  
MCBRYAN\_PUBERTAL\_TGFB1\_TARGETS\_DN  
BENPORATH\_NANOG\_TARGETS  
SHEPARD\_BMYB\_MORPHOLINO\_UP  
BHAT\_ESR1\_TARGETS\_NOT\_VIA\_AKT1\_UP  
TAKEDA\_TARGETS\_OF\_NUP98\_HOXA9\_FUSION\_16D\_UP  
KATSANOUE\_ELAVL1\_TARGETS\_UP  
HUANG\_GATA2\_TARGETS\_DN

KRIEG\_HYPOXIA\_NOT\_VIA\_KDM3A  
REACTOME\_GPCR\_DOWNSTREAM\_SIGNALING  
RIGGI\_EWING\_SARCOMA\_PROGENITOR\_DN  
MIKKELSEN\_IPS\_LCP\_WITH\_H3K4ME3  
YAGI\_AML\_FAB\_MARKERS  
SENESE\_HDAC3\_TARGETS\_DN  
YAO\_TEMPORAL\_RESPONSE\_TO\_PROGESTERONE\_CLUSTER\_1  
XU\_GH1\_AUTOCRINE\_TARGETS\_UP  
INGRAM\_SHH\_TARGETS\_UP  
DARWICHE\_PAPILLOMA\_RISK\_HIGH\_DN  
PURBEY\_TARGETS\_OF\_CTBP1\_NOT\_SATB1\_DN  
IZADPANAH\_STEM\_CELL\_ADIPOSE\_VS\_BONE\_DN  
HIRSCH\_CELLULAR\_TRANSFORMATION\_SIGNATURE\_UP  
BRUINS\_UVC\_RESPONSE\_VIA\_TP53\_GROUP\_A  
ZHOU\_INFLAMMATORY\_RESPONSE\_FIMA\_UP  
ZHANG\_TLX\_TARGETS\_DN  
MIKKELSEN\_NPC\_HCP\_WITH\_H3K27ME3  
REACTOME\_SIGNALING\_BY\_FGFR\_IN\_DISEASE  
WANG\_TUMOR\_INVASIVENESS\_DN  
KANG\_IMMORTALIZED\_BY\_TERT\_DN  
SERVITJA\_LIVER\_HNF1A\_TARGETS\_DN  
TAKEDA\_TARGETS\_OF\_NUP98\_HOXA9\_FUSION\_8D\_UP  
REACTOME\_SIGNALING\_BY\_PDGF  
PENG\_Glutamine\_DEPRIVATION\_DN  
TAKEDA\_TARGETS\_OF\_NUP98\_HOXA9\_FUSION\_10D\_UP  
MULLIGHAN\_NPM1\_SIGNATURE\_3\_DN  
BENPORATH\_EED\_TARGETS  
PLASARI\_TGFB1\_SIGNALING\_VIA\_NFIC\_1HR\_DN  
KEGG\_FOCAL\_ADHESION  
DEBIASI\_APOPTOSIS\_BY\_REOVIRUS\_INFECTION\_DN  
GOZGIT\_ESR1\_TARGETS\_DN  
TORCHIA\_TARGETS\_OF\_EWSR1\_FLI1\_FUSION\_DN  
PEREZ\_TP53\_AND\_TP63\_TARGETS  
CHARAFE\_BREAST\_CANCER\_LUMINAL\_VS\_BASAL\_UP  
ONDER\_CDH1\_TARGETS\_2\_UP  
MULLIGHAN\_NPM1\_MUTATED\_SIGNATURE\_1\_DN  
LIEN\_BREAST\_CARCINOMA\_METAPLASTIC\_VS\_DUCTAL\_DN  
ZWANG\_EGF\_INTERVAL\_DN  
KEGG\_PATHWAYS\_IN\_CANCER  
GREGORY\_SYNTHETIC\_LETHAL\_WITH\_IMATINIB  
PICCALUGA\_ANGIOIMMUNOBLASTIC\_LYMPHOMA\_UP  
GRAESSMANN\_RESPONSE\_TO\_MC\_AND\_SERUM\_DEPRIVATION\_UP

OSWALD\_HEMATOPOIETIC\_STEM\_CELL\_IN\_COLLAGEN\_GEL\_UP  
MARTINEZ\_TP53\_TARGETS\_DN  
NAKAMURA\_TUMOR\_ZONE\_PERIPHERAL\_VS\_CENTRAL\_UP  
KOINUMA\_TARGETS\_OF\_SMAD2\_OR\_SMAD3  
RODWELL\_AGING\_KIDNEY\_NO\_BLOOD\_UP  
SENESE\_HDAC3\_TARGETS\_UP  
GAUSSMANN\_MLL\_AF4\_FUSION\_TARGETS\_A\_UP  
RICKMAN\_TUMOR\_DIFFERENTIATED\_WELL\_VS\_POORLY\_DN  
SENESE\_HDAC1\_AND\_HDAC2\_TARGETS\_DN  
LEE\_LIVER\_CANCER\_ACOX1\_UP  
CHARAFE\_BREAST\_CANCER\_LUMINAL\_VS\_MESENCHYMAL\_UP  
MANALO\_HYPOXIA\_UP  
ZHONG\_SECRETOME\_OF\_LUNG\_CANCER\_AND\_FIBROBLAST  
DARWICHE\_SKIN\_TUMOR\_PROMOTER\_UP  
HAN\_SATB1\_TARGETS\_DN  
REACTOME\_SIGNALING\_BY\_GPCR  
SCHAEFFER\_PROSTATE\_DEVELOPMENT\_48HR\_DN  
NIELSEN\_GIST  
KRIEG\_KDM3A\_TARGETS\_NOT\_HYPOXIA  
WIERENGA\_STAT5A\_TARGETS\_UP  
RASHI\_RESPONSE\_TO\_IONIZING\_RADIATION\_5

| GS<br> follow link to MSigDB                  | GS DETAILS  | SIZE |
|-----------------------------------------------|-------------|------|
| KOBAYASHI_EGFR_SIGNALING_24HR_DN              | Details ... | 54   |
| GOBERT_OLIGODENDROCYTE_DIFFERENTIATION_UP     | Details ... | 97   |
| BURTON_ADIPOGENESIS_3                         | Details ... | 33   |
| CHANG_CYCLING_GENES                           | Details ... | 44   |
| ROSTY_CERVICAL_CANCER_PROLIFERATION_CLUSTER   | Details ... | 47   |
| LE_EGR2_TARGETS_UP                            | Details ... | 39   |
| KONG_E2F3_TARGETS                             | Details ... | 30   |
| SARRIO_EPITHELIAL_MESENCHYMAL_TRANSITION_UP   | Details ... | 37   |
| PUJANA_BRCA2_PCC_NETWORK                      | Details ... | 67   |
| DUTERTRE ESTRADIOL_RESPONSE_24HR_UP           | Details ... | 61   |
| POOLA_INVASIVE_BREAST_CANCER_UP               | Details ... | 59   |
| MARSON_BOUND_BY_E2F4_UNSTIMULATED             | Details ... | 89   |
| SOTIRIOU_BREAST_CANCER_GRADE_1_VS_3_UP        | Details ... | 35   |
| HOFFMANN_LARGE_TO_SMALL_PRE_BII_LYMPHOCYTE_UP | Details ... | 38   |
| ZHANG_TLX_TARGETS_60HR_DN                     | Details ... | 56   |
| CHIANG_LIVER_CANCER_SUBCLASS_PROLIFERATION_UP | Details ... | 35   |
| CROONQUIST_IL6_DEPRIVATION_DN                 | Details ... | 36   |
| ZHOU_CELL_CYCLE_GENES_IN_IR_RESPONSE_24HR     | Details ... | 34   |
| PUJANA_ATM_PCC_NETWORK                        | Details ... | 131  |
| QI_PLASMACYTOMA_UP                            | Details ... | 41   |
| REACTOME_CELL_CYCLE                           |             | 44   |
| GOLDRATH_ANTIGEN_RESPONSE                     |             | 74   |
| MORI_IMMATURE_B_LYMPHOCYTE_DN                 |             | 30   |
| BASAKI_YBX1_TARGETS_UP                        |             | 40   |
| BENPORATH_CYCLING_GENES                       |             | 95   |
| MORI_LARGE_PRE_BII_LYMPHOCYTE_UP              |             | 28   |
| ISHIDA_E2F_TARGETS                            |             | 19   |
| CROONQUIST_NRAS_SIGNALING_DN                  |             | 26   |
| REACTOME_DNA_REPLICATION                      |             | 30   |
| REACTOME_CELL_CYCLE_MITOTIC                   |             | 38   |
| CAIRO_HEPATOBLASTOMA_CLASSES_UP               |             | 73   |
| WHITEFORD_PEDIATRIC_CANCER_MARKERS            |             | 35   |
| PUJANA_XPRSS_INT_NETWORK                      |             | 32   |
| ZHOU_CELL_CYCLE_GENES_IN_IR_RESPONSE_6HR      |             | 23   |
| BLUM_RESPONSE_TO_SALIRASIB_DN                 |             | 75   |
| KANG_DOXORUBICIN_RESISTANCE_UP                |             | 19   |
| WU_APOPTOSIS_BY_CDKN1A_VIA_TP53               |             | 18   |
| REACTOME_MITOTIC_M_M_G1_PHASES                |             | 27   |
| SHEDDEN_LUNG_CANCER_POOR_SURVIVAL_A6          |             | 69   |
| FUJII_YBX1_TARGETS_DN                         |             | 39   |
| CHIARADONNA_NEOPLASTIC_TRANSFORMATION_KRAS_UP |             | 36   |

|                                               |     |
|-----------------------------------------------|-----|
| REACTOME_IMMUNE_SYSTEM                        | 79  |
| ODONNELL_TFRC_TARGETS_DN                      | 31  |
| CROONQUIST_NRAS_VS_STROMAL_STIMULATION_DN     | 21  |
| MARKEY_RB1_ACUTE_LOF_DN                       | 43  |
| PUJANA_BRCA1_PCC_NETWORK                      | 186 |
| NAKAYAMA_SOFT_TISSUE_TUMORS_PCA2_UP           | 19  |
| PID_BCR_5PATHWAY                              | 18  |
| HELLER_SILENCED_BY_METHYLATION_UP             | 43  |
| BASSO_CD40_SIGNALING_UP                       | 22  |
| MISSIAGLIA_REGULATED_BY_METHYLATION_DN        | 27  |
| MUELLER_PLURINET                              | 31  |
| RODRIGUES_THYROID_CARCINOMA_ANAPLASTIC_UP     | 69  |
| SONG_TARGETS_OF_IE86_CMV_PROTEIN              | 21  |
| FERREIRA_EWINGS_SARCOMA_UNSTABLE_VS_STABLE_UP | 26  |
| BIDUS_METASTASIS_UP                           | 28  |
| RHODES_UNDIFFERENTIATED_CANCER                | 22  |
| REN_BOUND_BY_E2F                              | 15  |
| KAUFFMANN_DNA_REPLICATION_GENES               | 20  |
| BENPORATH_PROLIFERATION                       | 27  |
| MCLACHLAN_DENTAL_CARIES_DN                    | 48  |
| KAUFFMANN_DNA_REPAIR_GENES                    | 20  |
| PUJANA_CHEK2_PCC_NETWORK                      | 98  |
| REACTOME_S_PHASE                              | 15  |
| RIZ_ERYTHROID_DIFFERENTIATION                 | 18  |
| TANG_SENESCENCE_TP53_TARGETS_DN               | 17  |
| HORIUCHI_WTAP_TARGETS_DN                      | 58  |
| WHITFIELD_CELL_CYCLE_LITERATURE               | 15  |
| MCLACHLAN_DENTAL_CARIES_UP                    | 49  |
| MORI_LARGE_PRE_BII_LYMPHOCYTE_DN              | 21  |
| GAVIN_FOXP3_TARGETS_CLUSTER_P6                | 21  |
| HADDAD_B_LYMPHOCYTE_PROGENITOR                | 41  |
| LI_WILMS_TUMOR_VS_FETAL_KIDNEY_1_DN           | 29  |
| WINNEPENNINCKX_MELANOMA_METASTASIS_UP         | 25  |
| WANG_RESPONSE_TO_GSK3_INHIBITOR_SB216763_DN   | 55  |
| LANDIS_ERBB2_BREAST_TUMORS_324_UP             | 19  |
| MORI_PRE_BI_LYMPHOCYTE_UP                     | 20  |
| MORI_PLASMA_CELL_DN                           | 15  |
| FEVR_CTNNB1_TARGETS_DN                        | 62  |
| PUJANA_BRCA_CENTERED_NETWORK                  | 21  |
| BOYAULT_LIVER_CANCER_SUBCLASS_G23_UP          | 15  |
| FURUKAWA_DUSP6_TARGETS_PCI35_DN               | 17  |
| AMUNDSON_GAMMA_RADIATION_RESPONSE             | 17  |

|                                               |     |
|-----------------------------------------------|-----|
| GRAHAM_NORMAL_QUIESCENT_VS_NORMAL_DIVIDING_DN | 22  |
| DODD_NASOPHARYNGEAL_CARCIOMA_DN               | 133 |
| WHITFIELD_CELL_CYCLE_G2_M                     | 35  |
| MITSIADES_RESPONSE_TO_APLIDIN_DN              | 49  |
| LEE_EARLY_T_LYMPHOCYTE_UP                     | 21  |
| WIELAND_UP_BY_HBV_INFECTION                   | 24  |
| KEGG_B_CELL_RECEPTOR_SIGNALING_PATHWAY        | 21  |
| KAMMINGA_EZH2_TARGETS                         | 15  |
| PATIL_LIVER_CANCER                            | 91  |
| MORI_MATURE_B_LYMPHOCYTE_UP                   | 16  |
| FOURNIER_ACINAR_DEVELOPMENT_LATE_2            | 36  |
| GRAHAM_CML_DIVIDING_VS_NORMAL_QUIESCENT_UP    | 45  |
| REACTOME_SIGNALING_BY_THE_B_CELL_RECEPTOR_BCR | 19  |
| ZHENG_GLIOMASTOMA_PLASTICITY_UP               | 59  |
| ZHANG_TLX_TARGETS_36HR_DN                     | 33  |
| CHEMNITZ_RESPONSE_TO_PROSTAGLANDIN_E2_UP      | 27  |
| VECCHI_GASTRIC_CANCER_EARLY_UP                | 58  |
| REACTOME_CYTOKINE_SIGNALING_IN_IMMUNE_SYSTEM  | 27  |
| ICHIBA_GRAFT_VERSUS_HOST_DISEASE_D7_UP        | 20  |
| BERENJENO_TRANSFORMED_BY_RHOA_UP              | 93  |
| SENGUPTA_NASOPHARYNGEAL_CARCIOMA_UP           | 38  |
| KEGG_CELL_CYCLE                               | 15  |
| MORI_IMMATURE_B_LYMPHOCYTE_UP                 | 16  |
| REACTOME_MITOTIC_G1_G1_S_PHASES               | 15  |
| REACTOME_INTERFERON_SIGNALING                 | 18  |
| RODWELL_AGING_KIDNEY_UP                       | 61  |
| MCBRYAN_PUBERTAL_BREAST_4_5WK_UP              | 48  |
| RUIZ_TNC_TARGETS_DN                           | 30  |
| KLEIN_PRIMARY_EFFUSION_LYMPHOMA_DN            | 22  |
| REACTOME_ADAPTIVE_IMMUNE_SYSTEM               | 47  |
| PASQUALUCCI_LYMPHOMA_BY_GC_STAGE_DN           | 26  |
| ZHANG_TLX_TARGETS_UP                          | 24  |
| WALLACE_PROSTATE_CANCER_RACE_UP               | 52  |
| GARY_CD5_TARGETS_DN                           | 43  |
| KINSEY_TARGETS_OF_EWSR1_FLII_FUSION_UP        | 147 |
| LEE_DIFFERENTIATING_T_LYMPHOCYTE              | 31  |
| BENPORATH_ES_1                                | 49  |
| TOYOTA_TARGETS_OF_MIR34B_AND_MIR34C           | 42  |
| HOLLMANN_APOPTOSIS_VIA_CD40_UP                | 31  |
| CHEN_METABOLIC_SYNDROM_NETWORK                | 147 |
| SMID_BREAST_CANCER_NORMAL_LIKE_UP             | 89  |
| SHEPARD_BMYB_MORPHOLINO_DN                    | 35  |

|                                                     |    |
|-----------------------------------------------------|----|
| SMID_BREAST_CANCER_BASAL_UP                         | 86 |
| JOHNSTONE_PARVB_TARGETS_3_DN                        | 74 |
| ZHANG_BREAST_CANCER_PROGENITORS_UP                  | 57 |
| GAL_LEUKEMIC_STEM_CELL_DN                           | 30 |
| PID_PDGFRBPATHWAY                                   | 16 |
| JOHANSSON_GLIOMAGENESIS_BY_PDGFB_UP                 | 16 |
| LEE_LIVER_CANCER_SURVIVAL_DN                        | 24 |
| PENG_RAPAMYCIN_RESPONSE_UP                          | 35 |
| FLECHNER_BIOPSY_KIDNEY_TRANSPLANT_REJECTED_VS_OK_UP | 24 |
| SHEPARD_CRUSH_AND_BURN_MUTANT_DN                    | 21 |
| NUYTEN_EZH2_TARGETS_DN                              | 98 |
| HOFFMANN_SMALL_PRE_BII_TO_IMMATURE_B_LYMPHOCYTE_UP  | 16 |
| AFFAR_YY1_TARGETS_DN                                | 49 |
| ICHIBA_GRAFT_VERSUS_HOST_DISEASE_35D_UP             | 25 |
| WHITFIELD_CELL_CYCLE_G2                             | 34 |
| WANG_CISPLATIN_RESPONSE_AND_XPC_UP                  | 35 |
| CHICAS_RB1_TARGETS_GROWING                          | 40 |
| DAZARD_RESPONSE_TO_UV_NHEK_DN                       | 25 |
| NEMETH_INFLAMMATORY_RESPONSE_LPS_UP                 | 18 |
| ALCALAY_AML_BY_NPM1_LOCALIZATION_DN                 | 42 |
| REACTOME_MITOTIC_PROMETAPHASE                       | 15 |
| SMIRNOV_RESPONSE_TO_IR_6HR_DN                       | 25 |
| BERTUCCI_MEDULLARY_VS_DUCTAL_BREAST_CANCER_UP       | 29 |
| GRAHAM_CML QUIESCENT_VS_NORMAL QUIESCENT_UP         | 25 |
| WONG_EMBRYONIC_STEM_CELL_CORE                       | 77 |
| ODONNELL_TARGETS_OF_MYC_AND_TFRC_DN                 | 15 |
| KEGG_CYTOKINE_CYTOKINE_RECEPTOR_INTERACTION         | 16 |
| PETROVA_ENDOTHELIUM_LYMPHATIC_VS_BLOOD_UP           | 26 |
| BROWNE_HCMV_INFECTION_24HR_UP                       | 16 |
| LINDGREN_BLADDER_CANCER_CLUSTER_3_UP                | 63 |
| MARTINEZ_RESPONSE_TO TRABECTEDIN_DN                 | 21 |
| LINDGREN_BLADDER_CANCER_CLUSTER_1_DN                | 67 |
| VANTVEER_BREAST_CANCER_ESR1_DN                      | 36 |
| KORKOLA_TERATOMA                                    | 15 |
| MANALO_HYPOXIA_DN                                   | 35 |
| ACEVEDO_FGFR1_TARGETS_IN_PROSTATE_CANCER_MODEL_UP   | 50 |
| WHITFIELD_CELL_CYCLE_G1_S                           | 17 |
| RASHI_RESPONSE_TO_IONIZING_RADIATION_6              | 19 |
| ONDER_CDH1_TARGETS_2_DN                             | 54 |
| MARKEY_RB1_ACUTE_LOF_UP                             | 41 |
| KEGG_FC_GAMMA_R_MEDIATED_PHAGOCYTOSIS               | 18 |
| GOTZMANN_EPITHELIAL_TO_MESENCHYMAL_TRANSITION_UP    | 15 |



|                                                      |     |
|------------------------------------------------------|-----|
| PAL_PRMT5_TARGETS_UP                                 | 34  |
| LABBE_WNT3A_TARGETS_UP                               | 24  |
| HELLER_HDAC_TARGETS_UP                               | 38  |
| BOYAULT_LIVER_CANCER_SUBCLASS_G3_UP                  | 28  |
| GRADE_COLON_AND_RECTAL_CANCER_UP                     | 45  |
| TARTE_PLASMA_CELL_VS_PLASMABLAST_DN                  | 70  |
| WHITFIELD_CELL_CYCLE_S                               | 20  |
| IZADPANAH_STEM_CELL_ADIPOSE_VS_BONE_UP               | 15  |
| CHICAS_RB1_TARGETS_SENESCENT                         | 59  |
| DUTERTRE ESTRADIOL_RESPONSE_6HR_UP                   | 30  |
| LEE_BMP2_TARGETS_DN                                  | 83  |
| KEGG_CHEMOKINE_SIGNALING_PATHWAY                     | 25  |
| CUI_TCF21_TARGETS_2_UP                               | 50  |
| HELLER_HDAC_TARGETS_DN                               | 31  |
| PENG_GLUCOSE_DEPRIVATION_DN                          | 15  |
| RUTELLA_RESPONSE_TO_HGF_VS_CSF2RB_AND_IL4_DN         | 29  |
| MARKEY_RB1_CHRONIC_LOF_UP                            | 23  |
| REACTOME_APOPTOSIS                                   | 18  |
| CONCANNON_APOPTOSIS_BY_EPOXOMICIN_DN                 | 33  |
| HELLER_HDAC_TARGETS_SILENCED_BY_METHYLATION_DN       | 36  |
| ZAMORA_NOS2_TARGETS_UP                               | 16  |
| KEGG_REGULATION_OF_ACTIN_CYTOSKELETON                | 19  |
| ZHANG_RESPONSE_TO_IKK_INHIBITOR_AND_TNF_UP           | 16  |
| RODRIGUES_THYROID_CARCINOMA_POORLY_DIFFERENTIATED_UP | 65  |
| BORLAK_LIVER_CANCER_EGF_UP                           | 15  |
| SMID_BREAST_CANCER_LUMINAL_B_DN                      | 90  |
| WILCOX_PRESPONSE_TO_ROGESTERONE_UP                   | 22  |
| BORCZUK_MALIGNANT_MESOTHELIOMA_UP                    | 27  |
| HOSHIDA_LIVER_CANCER_SUBCLASS_S1                     | 44  |
| REACTOME_INNATE_IMMUNE_SYSTEM                        | 18  |
| SASAKI_ADULT_T_CELL_LEUKEMIA                         | 29  |
| BASSO_B_LYMPHOCYTE_NETWORK                           | 22  |
| CHANDRAN_METASTASIS_UP                               | 15  |
| OLSSON_E2F3_TARGETS_DN                               | 15  |
| KEGG_LEUKOCYTE_TRANSENDOTHELIAL_MIGRATION            | 19  |
| CAIRO_LIVER_DEVELOPMENT_UP                           | 19  |
| MARSON_BOUND_BY_FOXP3_UNSTIMULATED                   | 103 |
| GEORGES_TARGETS_OF_MIR192_AND_MIR215                 | 75  |
| IVANOVA_HEMATOPOIESIS_LATE_PROGENITOR                | 67  |
| LI_INDUCED_T_TO_NATURAL_KILLER_UP                    | 34  |
| FOSTER_TOLERANT_MACROPHAGE_DN                        | 38  |
| VANTVEER_BREAST_CANCER_METASTASIS_DN                 | 23  |

|                                                |     |
|------------------------------------------------|-----|
| BOSCO_ALLERGEN_INDUCED_TH2_ASSOCIATED_MODULE   | 18  |
| SHEN_SMARCA2_TARGETS_DN                        | 18  |
| KIM_WT1_TARGETS_DN                             | 52  |
| BHATI_G2M_ARREST_BY_2METHOXYESTRADIOL_UP       | 15  |
| PYEON_CANCER_HEAD_AND_NECK_VS_CERVICAL_UP      | 18  |
| TSAI_RESPONSE_TO_IONIZING_RADIATION            | 21  |
| MATTIOLI_MGUS_VS_PCL                           | 15  |
| HELLER_HDAC_TARGETS_SILENCED_BY_METHYLATION_UP | 60  |
| LEE_LIVER_CANCER_DENA_UP                       | 18  |
| AMUNDSON_GENOTOXIC_SIGNATURE                   | 15  |
| BOQUEST_STEM_CELL_DN                           | 16  |
| SCIBETTA_KDM5B_TARGETS_DN                      | 16  |
| KUMAR_TARGETS_OF_MLL_AF9_FUSION                | 47  |
| SASSON_RESPONSE_TO_FORSKOLIN_DN                | 15  |
| BROCKE_APOPTOSIS_REVERSED_BY_IL6               | 23  |
| MATSUDA_NATURAL_KILLER_DIFFERENTIATION         | 78  |
| PILON_KLF1_TARGETS_DN                          | 185 |
| GROSS_HYPOXIA_VIA_ELK3_AND_HIF1A_DN            | 16  |
| RUTELLA_RESPONSE_TO_HGF_DN                     | 34  |
| KIM_WT1_TARGETS_UP                             | 24  |
| SASSON_RESPONSE_TO_GONADOTROPHINS_DN           | 15  |
| VERHAAK_GLIOMASTOMA_NEURAL                     | 18  |
| MARTENS_BOUND_BY_PML_RARA_FUSION               | 53  |
| CHANG_CORE_SERUM_RESPONSE_UP                   | 28  |
| GRESHOCK_CANCER_COPY_NUMBER_UP                 | 32  |
| YAMAZAKI_TCEB3_TARGETS_UP                      | 19  |
| AZARE_NEOPLASTIC_TRANSFORMATION_BY_STAT3_DN    | 16  |
| WU_SILENCED_BY_METHYLATION_IN_BLADDER_CANCER   | 16  |
| VERHAAK_AML_WITH_NPM1_MUTATED_DN               | 41  |
| YAGI_AML_WITH_T_8_21_TRANSLOCATION             | 44  |
| KINSEY_TARGETS_OF_EWSR1_FLII_FUSION_DN         | 29  |
| SMID_BREAST_CANCER_RELAPSE_IN_BONE_DN          | 41  |
| PID_CXCR4_PATHWAY                              | 16  |
| LINDGREN_BLADDER_CANCER_CLUSTER_2B             | 51  |
| DELYS_THYROID_CANCER_UP                        | 61  |
| GROSS_HYPOXIA_VIA_ELK3_UP                      | 37  |
| LENAOUR_DENDRITIC_CELL_MATURATION_DN           | 17  |
| MULLIGHAN_MLL_SIGNATURE_1_UP                   | 46  |
| BILD_E2F3_ONCOGENIC_SIGNATURE                  | 22  |
| GARCIA_TARGETS_OF_FLI1_AND_DAX1_DN             | 17  |
| SHETH_LIVER_CANCER_VS_TXNIP_LOSS_PAM1          | 24  |
| LEE_LIVER_CANCER_MYC_E2F1_UP                   | 15  |

|                                                        |    |
|--------------------------------------------------------|----|
| MORI_EMU_MYC_LYMPHOMA_BY_ONSET_TIME_UP                 | 16 |
| PETROVA_ENDOTHELIUM_LYMPHATIC_VS_BLOOD_DN              | 27 |
| CHICAS_RB1_TARGETS_CONFLUENT                           | 70 |
| WEST_ADRENOCORTICAL_TUMOR_UP                           | 40 |
| SCHAEFFER_PROSTATE_DEVELOPMENT_6HR_DN                  | 53 |
| OSMAN_BLADDER_CANCER_DN                                | 17 |
| DER_IFN_GAMMA_RESPONSE_UP                              | 15 |
| GROSS_HYPOXIA_VIA_ELK3_DN                              | 17 |
| HAHTOLA_MYCOSIS_FUNGOIDES_SKIN_UP                      | 16 |
| AMUNDSON_POOR_SURVIVAL_AFTER_GAMMA_RADIATION_2G        | 26 |
| THUM_SYSTOLIC_HEART_FAILURE_UP                         | 59 |
| KIM_GLIS2_TARGETS_UP                                   | 17 |
| WIERENGA_STAT5A_TARGETS_DN                             | 27 |
| JAATINEN_HEMATOPOIETIC_STEM_CELL_DN                    | 17 |
| DOANE_RESPONSE_TO_ANDROGEN_DN                          | 33 |
| DACOSTA_UV_RESPONSE_VIA_ERCC3_DN                       | 63 |
| SANA_RESPONSE_TO_IFNG_DN                               | 16 |
| KASLER_HDAC7_TARGETS_1_UP                              | 18 |
| TIEN_INTESTINE_PROBIOTICS_24HR_UP                      | 99 |
| REACTOME_GPCR_LIGAND_BINDING                           | 16 |
| RODRIGUES_NTN1_TARGETS_DN                              | 17 |
| MULLIGHAN_MLL_SIGNATURE_2_UP                           | 50 |
| PHONG_TNF_RESPONSE_NOT_VIA_P38                         | 33 |
| RAY_TUMORIGENESIS_BY_ERBB2_CDC25A_UP                   | 17 |
| LIAO_METASTASIS                                        | 39 |
| GENTILE_UV_HIGH_DOSE_DN                                | 33 |
| LIU_VAV3_PROSTATE_CARCINOGENESIS_UP                    | 24 |
| POTTI_ADRIAMYCIN_SENSITIVITY                           | 15 |
| VERHAAK_AML_WITH_NPM1_MUTATED_UP                       | 25 |
| RIZKI_TUMOR_INVASIVENESS_3D_DN                         | 29 |
| KEGG_MAPK_SIGNALING_PATHWAY                            | 17 |
| ZHU_CMV_ALL_DN                                         | 21 |
| WU_CELL_MIGRATION                                      | 31 |
| DEMAGALHAES_AGING_UP                                   | 16 |
| SCHUETZ_BREAST_CANCER_DUCTAL_INVASIVE_UP               | 50 |
| DEURIG_T_CELL_PROLYMPHOCYTIC_LEUKEMIA_UP               | 41 |
| REACTOME_PLATELET_ACTIVATION_SIGNALING_AND_AGGREGATION | 26 |
| SABATES_COLORECTAL_ADENOMA_UP                          | 15 |
| ZHENG_BOUND_BY_FOXP3                                   | 36 |
| SHEDDEN_LUNG_CANCER_GOOD_SURVIVAL_A12                  | 20 |
| DACOSTA_UV_RESPONSE_VIA_ERCC3_COMMON_DN                | 38 |
| GRUETZMANN_PANCREATIC_CANCER_UP                        | 74 |

|                                              |     |
|----------------------------------------------|-----|
| TSENG_IRS1_TARGETS_UP                        | 20  |
| DAIRKEE_CANCER_PRONE_RESPONSE_BPA_E2         | 23  |
| MORI_MATURE_B_LYMPHOCYTE_DN                  | 17  |
| BROWNE_HCMV_INFECTION_14HR_DN                | 31  |
| SENESE_HDAC1_TARGETS_UP                      | 33  |
| FERRANDO_T_ALL_WITH_MLL_ENL_FUSION_DN        | 22  |
| BRUINS_UVC_RESPONSE_VIA_TP53_GROUP_D         | 20  |
| PHONG_TNF_RESPONSE_VIA_P38_PARTIAL           | 21  |
| ZWANG_CLASS_1_TRANSIENTLY_INDUCED_BY_EGF     | 37  |
| VART_KSHV_INFECTION_ANGIOGENIC_MARKERS_UP    | 18  |
| MEISSNER_BRAIN_HCP_WITH_H3K4ME3_AND_H3K27ME3 | 104 |
| ZHOU_INFLAMMATORY_RESPONSE_LPS_UP            | 24  |
| BENPORATH_NOS_TARGETS                        | 15  |
| KIM_WT1_TARGETS_12HR_DN                      | 24  |
| REACTOME_HEMOSTASIS                          | 54  |
| ZHOU_INFLAMMATORY_RESPONSE_LIVE_UP           | 32  |
| SENGUPTA_NASOPHARYNGEAL_CARCINOMA_DN         | 21  |
| BILD_HRAS_ONCOGENIC_SIGNATURE                | 21  |
| RICKMAN_METASTASIS_DN                        | 26  |
| BASSO_CD40_SIGNALING_DN                      | 15  |
| MARSON_BOUND_BY_FOXP3_STIMULATED             | 87  |
| MCBRYAN_PUBERTAL_BREAST_6_7WK_DN             | 22  |
| TONKS_TARGETS_OF_RUNX1_RUNX1T1_FUSION_HSC_DN | 25  |
| CHYLA_CBFA2T3_TARGETS_UP                     | 45  |
| GRADE_COLON_CANCER_UP                        | 87  |
| GAVIN_FOXP3_TARGETS_CLUSTER_P3               | 22  |
| RASHI_RESPONSE_TO_IONIZING_RADIATION_2       | 15  |
| JACKSON_DNMT1_TARGETS_UP                     | 17  |
| HUANG_GATA2_TARGETS_UP                       | 22  |
| THEILGAARD_NEUTROPHIL_AT_SKIN_WOUND_DN       | 28  |
| ZHU_CMV_24_HR_DN                             | 17  |
| JISON_SICKLE_CELL_DISEASE_UP                 | 21  |
| PROVENZANI_METASTASIS_DN                     | 19  |
| DEURIG_T_CELL_PROLYMPHOCYTIC_LEUKEMIA_DN     | 31  |
| KIM_WT1_TARGETS_8HR_UP                       | 17  |
| KOBAYASHI_EGFR_SIGNALING_24HR_UP             | 18  |
| CHARAFE_BREAST_CANCER_LUMINAL_VS_BASAL_DN    | 61  |
| HAMAI_APOPTOSIS_VIA_TRAIL_UP                 | 52  |
| LEI_MYB_TARGETS                              | 50  |
| MARTORIATI_MDM4_TARGETS_FETAL_LIVER_DN       | 46  |
| BENPORATH_OCT4_TARGETS                       | 26  |
| BLALOCK_ALZHEIMERS_DISEASE_UP                | 150 |

|                                                  |    |
|--------------------------------------------------|----|
| KEEN_RESPONSE_TO_ROSIGLITAZONE_DN                | 19 |
| BROWNE_HCMV_INFECTION_48HR_UP                    | 21 |
| SPIELMAN_LYMPHOBLAST_EUROPEAN_VS_ASIAN_UP        | 73 |
| LINDVALL_IMMORTALIZED_BY_TERT_DN                 | 15 |
| LABBE_TARGETS_OF_TGFB1_AND_WNT3A_DN              | 20 |
| NUYTEN_NIPP1_TARGETS_DN                          | 88 |
| KEGG_CALCIUM_SIGNALING_PATHWAY                   | 17 |
| BLALOCK_ALZHEIMERS_DISEASE_INCIPENT_UP           | 39 |
| WANG_ESOPHAGUS_CANCER_VS_NORMAL_UP               | 18 |
| LEE_LIVER_CANCER_E2F1_UP                         | 17 |
| COLINA_TARGETS_OF_4EBP1_AND_4EBP2                | 67 |
| KIM_WT1_TARGETS_12HR_UP                          | 23 |
| SENESE_HDAC1_AND_HDAC2_TARGETS_UP                | 18 |
| REACTOME_G_ALPHA_I_SIGNALLING_EVENTS             | 15 |
| NUYTEN_EZH2_TARGETS_UP                           | 84 |
| DARWICHE_PAPILLOMA_RISK_LOW_DN                   | 15 |
| WELCSH_BRCA1_TARGETS_DN                          | 18 |
| PLASARI_TGFB1_TARGETS_10HR_UP                    | 17 |
| MARTENS_TRETINOIN_RESPONSE_DN                    | 60 |
| SHETH_LIVER_CANCER_VS_TXNIP_LOSS_PAM2            | 24 |
| SMIRNOV_CIRCULATING_ENDOTHELIOCYTES_IN_CANCER_UP | 22 |
| RIZKI_TUMOR_INVASIVENESS_3D_UP                   | 21 |
| WANG_RESPONSE_TO_GSK3_INHIBITOR_SB216763_UP      | 38 |
| VERHAAK_GLIOMASTOMA_PRONEURAL                    | 17 |
| ROZANOV_MMP14_TARGETS_UP                         | 38 |
| SABATES_COLORECTAL_ADENOMA_DN                    | 36 |
| COLDREN_GEFITINIB_RESISTANCE_DN                  | 18 |
| WONG_ADULT_TISSUE_STEM_MODULE                    | 83 |
| AMIT_EGF_RESPONSE_480_HELA                       | 27 |
| KOKKINAKIS_METHIONINE_DEPRIVATION_96HR_UP        | 18 |
| UDAYAKUMAR_MED1_TARGETS_DN                       | 20 |
| BUYTAERT_PHOTODYNAMIC_THERAPY_STRESS_DN          | 74 |
| HUMMERICH_SKIN_CANCER_PROGRESSION_UP             | 15 |
| TARTE_PLASMA_CELL_VS_PLASMABLAST_UP              | 36 |
| CHIANG_LIVER_CANCER_SUBCLASS_CTNNB1_DN           | 20 |
| PENG_LEUCINE_DEPRIVATION_UP                      | 16 |
| SERVITJA_ISLET_HNF1A_TARGETS_UP                  | 23 |
| PASQUALUCCI_LYMPHOMA_BY_GC_STAGE_UP              | 38 |
| BENPORATH_MYC_TARGETS_WITH_EBOX                  | 42 |
| MASSARWEH_TAMOXIFEN_RESISTANCE_DN                | 23 |
| MARTINEZ_RB1_AND_TP53_TARGETS_DN                 | 50 |
| BROWNE_HCMV_INFECTION_24HR_DN                    | 25 |

|                                                  |    |
|--------------------------------------------------|----|
| AMUNDSON_POOR_SURVIVAL_AFTER_GAMMA_RADIATION_8G  | 21 |
| KAAB_HEART_ATRIUM_VS_VENTRICLE_UP                | 32 |
| BOYLAN_MULTIPLE_MYELOMA_C_D_DN                   | 35 |
| JOHNSTONE_PARVB_TARGETS_2_UP                     | 22 |
| BROWNE_HCMV_INFECTION_4HR_DN                     | 18 |
| BROWNE_HCMV_INFECTION_16HR_UP                    | 21 |
| CHIARADONNA_NEOPLASTIC_TRANSFORMATION_CDC25_UP   | 19 |
| PEDRIOLI_MIR31_TARGETS_UP                        | 17 |
| CREIGHTON_ENDOCRINE_THERAPY_RESISTANCE_1         | 36 |
| ZHONG_SECRETOME_OF_LUNG_CANCER_AND_MACROPHAGE    | 15 |
| LINDSTEDT_DENDRITIC_CELL_MATURATION_D            | 15 |
| BHATTACHARYA_EMBRYONIC_STEM_CELL                 | 15 |
| ZWANG_DOWN_BY_2ND_EGF_PULSE                      | 20 |
| MARKEY_RB1_CHRONIC_LOF_DN                        | 18 |
| YAGI_AML_WITH_11Q23_REARRANGED                   | 44 |
| ZHONG_RESPONSE_TO_AZACITIDINE_AND_TSA_UP         | 20 |
| MILI_PSEUDOPODIA_HAPTOTAXIS_DN                   | 51 |
| DANG_MYC_TARGETS_UP                              | 18 |
| MIYAGAWA_TARGETS_OF_EWSR1_ETS_FUSIONS_UP         | 32 |
| HILLION_HMGA1_TARGETS                            | 15 |
| NIKOLSKY_BREAST_CANCER_17Q21_Q25_AMPLICON        | 32 |
| CHARAFE_BREAST_CANCER_LUMINAL_VS_MESENCHYMAL_DN  | 51 |
| KOKKINAKIS_METHIONINE_DEPRIVATION_48HR_UP        | 16 |
| KUMAR_PATHOGEN_LOAD_BY_MACROPHAGES               | 20 |
| PASINI_SUZ12_TARGETS_DN                          | 38 |
| BOYLAN_MULTIPLE_MYELOMA_C_D_UP                   | 16 |
| PROVENZANI_METASTASIS_UP                         | 28 |
| ACEVEDO_NORMAL_TISSUE_ADJACENT_TO_LIVER_TUMOR_UP | 21 |
| DANG_REGULATED_BY_MYC_DN                         | 39 |
| SANA_TNF_SIGNALING_DN                            | 15 |
| RAMALHO_STEMNESS_DN                              | 17 |
| WANG_LMO4_TARGETS_DN                             | 18 |
| ALCALA_APOPTOSIS                                 | 17 |
| UDAYAKUMAR_MED1_TARGETS_UP                       | 21 |
| WOOD_EBV_EBNA1_TARGETS_UP                        | 15 |
| MCBRYAN_PUBERTAL_TGFB1_TARGETS_DN                | 15 |
| BENPORATH_NANOG_TARGETS                          | 82 |
| SHEPARD_BMYB_MORPHOLINO_UP                       | 22 |
| BHAT_ESR1_TARGETS_NOT_VIA_AKT1_UP                | 16 |
| TAKEDA_TARGETS_OF_NUP98_HOXA9_FUSION_16D_UP      | 21 |
| KATSANOOU_ELAVL1_TARGETS_UP                      | 22 |
| HUANG_GATA2_TARGETS_DN                           | 15 |

|                                                    |    |
|----------------------------------------------------|----|
| KRIEG_HYPOXIA_NOT_VIA_KDM3A                        | 80 |
| REACTOME_GPCR_DOWNSTREAM_SIGNALING                 | 30 |
| RIGGI_EWING_SARCOMA_PROGENITOR_DN                  | 34 |
| MIKKELSEN_IPS_LCP_WITH_H3K4ME3                     | 16 |
| YAGI_AML_FAB_MARKERS                               | 31 |
| SENESE_HDAC3_TARGETS_DN                            | 42 |
| YAO_TEMPORAL_RESPONSE_TO_PROGESTERONE_CLUSTER_1    | 15 |
| XU_GH1_AUTOCRINE_TARGETS_UP                        | 26 |
| INGRAM_SHH_TARGETS_UP                              | 18 |
| DARWICHE_PAPILLOMA_RISK_HIGH_DN                    | 17 |
| PURBEY_TARGETS_OF_CTBP1_NOT_SATB1_DN               | 36 |
| IZADPANAH_STEM_CELL_ADIPOSE_VS_BONE_DN             | 18 |
| HIRSCH_CELLULAR_TRANSFORMATION_SIGNATURE_UP        | 18 |
| BRUINS_UVC_RESPONSE_VIA_TP53_GROUP_A               | 59 |
| ZHOU_INFLAMMATORY_RESPONSE_FIMA_UP                 | 32 |
| ZHANG_TLX_TARGETS_DN                               | 22 |
| MIKKELSEN_NPC_HCP_WITH_H3K27ME3                    | 19 |
| REACTOME_SIGNALING_BY_FGFR_IN_DISEASE              | 15 |
| WANG_TUMOR_INVASIVENESS_DN                         | 26 |
| KANG_IMMORTALIZED_BY_TERT_DN                       | 18 |
| SERVITJA_LIVER_HNF1A_TARGETS_DN                    | 15 |
| TAKEDA_TARGETS_OF_NUP98_HOXA9_FUSION_8D_UP         | 17 |
| REACTOME_SIGNALING_BY_PDGF                         | 17 |
| PENG_Glutamine_DEPRIVATION_DN                      | 34 |
| TAKEDA_TARGETS_OF_NUP98_HOXA9_FUSION_10D_UP        | 27 |
| MULLIGHAN_NPM1_SIGNATURE_3_DN                      | 22 |
| BENPORATH_EED_TARGETS                              | 57 |
| PLASARI_TGFB1_SIGNALING_VIA_NFIC_1HR_DN            | 18 |
| KEGG_FOCAL_ADHESION                                | 26 |
| DEBIASI_APOPTOSIS_BY_REOVIRUS_INFECTION_DN         | 40 |
| GOZGIT_ESR1_TARGETS_DN                             | 61 |
| TORCHIA_TARGETS_OF_EWSR1_FLI1_FUSION_DN            | 40 |
| PEREZ_TP53_AND_TP63_TARGETS                        | 15 |
| CHARAFE_BREAST_CANCER_LUMINAL_VS_BASAL_UP          | 31 |
| ONDER_CDH1_TARGETS_2_UP                            | 32 |
| MULLIGHAN_NPM1_MUTATED_SIGNATURE_1_DN              | 18 |
| LIEN_BREAST_CARCINOMA_METAPLASTIC_VS_DUCTAL_DN     | 16 |
| ZWANG_EGF_INTERVAL_DN                              | 18 |
| KEGG_PATHWAYS_IN_CANCER                            | 30 |
| GREGORY_SYNTHETIC_LETHAL_WITH_IMATINIB             | 18 |
| PICCALUGA_ANGIOIMMUNOBLASTIC_LYMPHOMA_UP           | 34 |
| GRAESSMANN_RESPONSE_TO_MC_AND_SERUM_DEPRIVATION_UP | 21 |

|                                                   |    |
|---------------------------------------------------|----|
| OSWALD_HEMATOPOIETIC_STEM_CELL_IN_COLLAGEN_GEL_UP | 23 |
| MARTINEZ_TP53_TARGETS_DN                          | 59 |
| NAKAMURA_TUMOR_ZONE_PERIPHERAL_VS_CENTRAL_UP      | 28 |
| KOINUMA_TARGETS_OF_SMAD2_OR_SMAD3                 | 74 |
| RODWELL_AGING_KIDNEY_NO_BLOOD_UP                  | 23 |
| SENESE_HDAC3_TARGETS_UP                           | 36 |
| GAUSSMANN_MLL_AF4_FUSION_TARGETS_A_UP             | 16 |
| RICKMAN_TUMOR_DIFFERENTIATED_WELL_VS_POORLY_DN    | 31 |
| SENESE_HDAC1_AND_HDAC2_TARGETS_DN                 | 21 |
| LEE_LIVER_CANCER_ACOX1_UP                         | 22 |
| CHARAFE_BREAST_CANCER_LUMINAL_VS_MESENCHYMAL_UP   | 35 |
| MANALO_HYPOXIA_UP                                 | 25 |
| ZHONG_SECRETOME_OF_LUNG_CANCER_AND_FIBROBLAST     | 17 |
| DARWICHE_SKIN_TUMOR_PROMOTER_UP                   | 18 |
| HAN_SATB1_TARGETS_DN                              | 54 |
| REACTOME_SIGNALING_BY_GPCR                        | 35 |
| SCHAEFFER_PROSTATE_DEVELOPMENT_48HR_DN            | 42 |
| NIELSEN_GIST                                      | 18 |
| KRIEG_KDM3A_TARGETS_NOT_HYPOXIA                   | 15 |
| WIERENGA_STAT5A_TARGETS_UP                        | 15 |
| RASHI_RESPONSE_TO_IONIZING_RADIATION_5            | 16 |



| ES          | NES        | NOM p-val | FDR q-val | FWER p-val | RANK AT MAX |
|-------------|------------|-----------|-----------|------------|-------------|
| -0.7308638  | -5.07339   | 0         | 0         | 0          | 315         |
| -0.5868367  | -4.74437   | 0         | 0         | 0          | 315         |
| -0.791213   | -4.720301  | 0         | 0         | 0          | 229         |
| -0.70969343 | -4.686857  | 0         | 0         | 0          | 323         |
| -0.69772327 | -4.6513457 | 0         | 0         | 0          | 334         |
| -0.7265829  | -4.540115  | 0         | 0         | 0          | 234         |
| -0.7866296  | -4.531212  | 0         | 0         | 0          | 229         |
| -0.72955054 | -4.4458075 | 0         | 0         | 0          | 213         |
| -0.59808975 | -4.440073  | 0         | 0         | 0          | 387         |
| -0.62168074 | -4.438747  | 0         | 0         | 0          | 315         |
| -0.61084145 | -4.4200068 | 0         | 0         | 0          | 319         |
| -0.55568373 | -4.4178557 | 0         | 0         | 0          | 271         |
| -0.72885674 | -4.313953  | 0         | 0         | 0          | 315         |
| -0.69089764 | -4.2930017 | 0         | 0         | 0          | 229         |
| -0.6009962  | -4.2506304 | 0         | 0         | 0          | 315         |
| -0.66938317 | -4.1441627 | 0         | 0         | 0          | 234         |
| -0.6924938  | -4.1308484 | 0         | 0         | 0          | 263         |
| -0.7076967  | -4.1075544 | 0         | 0         | 0          | 248         |
| -0.47276405 | -4.107341  | 0         | 0         | 0          | 391         |
| -0.6333866  | -4.1069207 | 0         | 0         | 0          | 327         |
| -0.63677704 | -4.0981984 | 0         | 0         | 0          | 315         |
| -0.5298413  | -4.086143  | 0         | 0         | 0          | 315         |
| -0.7043727  | -4.066873  | 0         | 0         | 0          | 258         |
| -0.6411378  | -3.995247  | 0         | 0         | 0          | 234         |
| -0.5058514  | -3.9310117 | 0         | 0         | 0          | 335         |
| -0.7251459  | -3.920823  | 0         | 0         | 0          | 261         |
| -0.80494124 | -3.898815  | 0         | 0         | 0          | 229         |
| -0.7351492  | -3.8855445 | 0         | 0         | 0          | 291         |
| -0.68642104 | -3.8714836 | 0         | 0         | 0          | 279         |
| -0.6379947  | -3.8317552 | 0         | 0         | 0          | 227         |
| -0.51579666 | -3.81206   | 0         | 0         | 0          | 315         |
| -0.6427512  | -3.8032923 | 0         | 0         | 0          | 315         |
| -0.6643399  | -3.7868528 | 0         | 0         | 0          | 387         |
| -0.71941596 | -3.7685745 | 0         | 0         | 0          | 212         |
| -0.47849482 | -3.740072  | 0         | 0         | 0          | 313         |
| -0.77086383 | -3.7244184 | 0         | 0         | 0          | 272         |
| -0.8040498  | -3.7123811 | 0         | 0         | 0          | 215         |
| -0.6698049  | -3.710492  | 0         | 0         | 0          | 279         |
| -0.4913769  | -3.6877084 | 0         | 0         | 0          | 315         |
| -0.5764529  | -3.6445234 | 0         | 0         | 0          | 278         |
| -0.5900211  | -3.6229658 | 0         | 0         | 0          | 261         |

|             |            |   |   |   |     |
|-------------|------------|---|---|---|-----|
| -0.481825   | -3.610708  | 0 | 0 | 0 | 339 |
| -0.6287523  | -3.6091423 | 0 | 0 | 0 | 229 |
| -0.7193959  | -3.6046705 | 0 | 0 | 0 | 212 |
| -0.5552107  | -3.5887275 | 0 | 0 | 0 | 365 |
| -0.3767131  | -3.572819  | 0 | 0 | 0 | 289 |
| -0.7571662  | -3.5628467 | 0 | 0 | 0 | 229 |
| -0.76272017 | -3.5421526 | 0 | 0 | 0 | 286 |
| -0.53744817 | -3.5167062 | 0 | 0 | 0 | 314 |
| -0.69966185 | -3.514762  | 0 | 0 | 0 | 247 |
| -0.63244224 | -3.5110855 | 0 | 0 | 0 | 335 |
| -0.60699916 | -3.4982648 | 0 | 0 | 0 | 315 |
| -0.4556745  | -3.4967864 | 0 | 0 | 0 | 363 |
| -0.68164295 | -3.4767838 | 0 | 0 | 0 | 215 |
| -0.629045   | -3.4728348 | 0 | 0 | 0 | 309 |
| -0.62611526 | -3.4660048 | 0 | 0 | 0 | 315 |
| -0.6756908  | -3.4531295 | 0 | 0 | 0 | 333 |
| -0.79326683 | -3.4354596 | 0 | 0 | 0 | 226 |
| -0.70589453 | -3.4222627 | 0 | 0 | 0 | 215 |
| -0.6237411  | -3.4187667 | 0 | 0 | 0 | 335 |
| -0.49742877 | -3.4128718 | 0 | 0 | 0 | 438 |
| -0.6966776  | -3.4054134 | 0 | 0 | 0 | 255 |
| -0.40484557 | -3.4017408 | 0 | 0 | 0 | 309 |
| -0.76339084 | -3.3998265 | 0 | 0 | 0 | 279 |
| -0.7261572  | -3.37015   | 0 | 0 | 0 | 249 |
| -0.726707   | -3.3574617 | 0 | 0 | 0 | 315 |
| -0.4574943  | -3.356929  | 0 | 0 | 0 | 296 |
| -0.7922267  | -3.3523195 | 0 | 0 | 0 | 227 |
| -0.47964105 | -3.331017  | 0 | 0 | 0 | 384 |
| -0.6477423  | -3.3208094 | 0 | 0 | 0 | 381 |
| -0.6667087  | -3.317887  | 0 | 0 | 0 | 315 |
| -0.5094177  | -3.31345   | 0 | 0 | 0 | 200 |
| -0.58504945 | -3.310919  | 0 | 0 | 0 | 248 |
| -0.6131385  | -3.2859507 | 0 | 0 | 0 | 315 |
| -0.46358815 | -3.276641  | 0 | 0 | 0 | 341 |
| -0.661442   | -3.264906  | 0 | 0 | 0 | 452 |
| -0.6696752  | -3.2628477 | 0 | 0 | 0 | 258 |
| -0.73986477 | -3.262653  | 0 | 0 | 0 | 238 |
| -0.4350742  | -3.2501004 | 0 | 0 | 0 | 342 |
| -0.6497305  | -3.243176  | 0 | 0 | 0 | 296 |
| -0.7710938  | -3.231778  | 0 | 0 | 0 | 309 |
| -0.71883273 | -3.2202203 | 0 | 0 | 0 | 301 |
| -0.6930359  | -3.1960924 | 0 | 0 | 0 | 227 |

|             |            |   |          |       |     |
|-------------|------------|---|----------|-------|-----|
| -0.64591956 | -3.1930747 | 0 | 0        | 0     | 227 |
| -0.35293403 | -3.1888142 | 0 | 0        | 0     | 315 |
| -0.51832914 | -3.1804056 | 0 | 0        | 0     | 357 |
| -0.475814   | -3.1713436 | 0 | 0        | 0     | 335 |
| -0.6457546  | -3.154209  | 0 | 0        | 0     | 272 |
| -0.5977353  | -3.1471312 | 0 | 0        | 0     | 400 |
| -0.6407119  | -3.1365976 | 0 | 0        | 0     | 321 |
| -0.73241436 | -3.1068242 | 0 | 0        | 0     | 313 |
| -0.37499842 | -3.1022904 | 0 | 0        | 0     | 301 |
| -0.69972247 | -3.1010916 | 0 | 0        | 0     | 381 |
| -0.4949934  | -3.0945134 | 0 | 0        | 0     | 405 |
| -0.46827963 | -3.091376  | 0 | 0        | 0     | 248 |
| -0.6511764  | -3.0852232 | 0 | 0        | 0     | 279 |
| -0.4520358  | -3.0769253 | 0 | 0        | 0     | 226 |
| -0.5407636  | -3.0765078 | 0 | 0        | 0     | 213 |
| -0.566546   | -3.0611567 | 0 | 0        | 0     | 272 |
| -0.41180512 | -3.0445902 | 0 | 0        | 0     | 318 |
| -0.5672115  | -3.040423  | 0 | 0        | 0     | 339 |
| -0.6399739  | -3.0376651 | 0 | 0        | 0     | 434 |
| -0.38073477 | -3.03243   | 0 | 0        | 0     | 366 |
| -0.49119228 | -3.024402  | 0 | 0        | 0     | 306 |
| -0.6901624  | -3.0113382 | 0 | 0        | 0     | 227 |
| -0.67540014 | -2.9930892 | 0 | 0        | 0     | 381 |
| -0.69407487 | -2.9920738 | 0 | 0        | 0     | 279 |
| -0.65521127 | -2.9768405 | 0 | 0        | 0     | 366 |
| -0.41339624 | -2.971067  | 0 | 0        | 0     | 497 |
| -0.43881747 | -2.9671304 | 0 | 0        | 0     | 582 |
| -0.5150937  | -2.9655647 | 0 | 0        | 0     | 315 |
| -0.562918   | -2.9440982 | 0 | 2.28E-05 | 0.001 | 264 |
| -0.44193432 | -2.9395132 | 0 | 2.26E-05 | 0.001 | 286 |
| -0.55140233 | -2.9344504 | 0 | 2.24E-05 | 0.001 | 365 |
| -0.55863667 | -2.907015  | 0 | 2.22E-05 | 0.001 | 248 |
| -0.43144894 | -2.897204  | 0 | 2.20E-05 | 0.001 | 407 |
| -0.44059214 | -2.8775902 | 0 | 2.18E-05 | 0.001 | 239 |
| -0.3094696  | -2.8743846 | 0 | 2.16E-05 | 0.001 | 277 |
| -0.49769834 | -2.87261   | 0 | 2.14E-05 | 0.001 | 451 |
| -0.4259458  | -2.8527615 | 0 | 2.13E-05 | 0.001 | 355 |
| -0.45281813 | -2.8520594 | 0 | 2.11E-05 | 0.001 | 301 |
| -0.51835126 | -2.8495727 | 0 | 2.09E-05 | 0.001 | 187 |
| -0.30498353 | -2.8487196 | 0 | 2.07E-05 | 0.001 | 326 |
| -0.35146847 | -2.8472464 | 0 | 2.06E-05 | 0.001 | 222 |
| -0.4655804  | -2.838423  | 0 | 2.04E-05 | 0.001 | 219 |

|             |            |            |            |       |     |
|-------------|------------|------------|------------|-------|-----|
| -0.3488316  | -2.7839088 | 0          | 3.60E-05   | 0.002 | 402 |
| -0.36422852 | -2.755831  | 0          | 3.58E-05   | 0.002 | 301 |
| -0.3869781  | -2.7460883 | 0          | 3.55E-05   | 0.002 | 366 |
| -0.47824207 | -2.7315698 | 0          | 3.52E-05   | 0.002 | 227 |
| -0.59493995 | -2.69395   | 0          | 7.04E-05   | 0.004 | 340 |
| -0.61098146 | -2.67365   | 0          | 8.76E-05   | 0.005 | 268 |
| -0.50322396 | -2.6404998 | 0          | 1.22E-04   | 0.007 | 278 |
| -0.43469253 | -2.6347566 | 0          | 1.21E-04   | 0.007 | 260 |
| -0.49878672 | -2.5825787 | 0          | 1.37E-04   | 0.008 | 442 |
| -0.5226205  | -2.5784652 | 0          | 1.36E-04   | 0.008 | 342 |
| -0.31015328 | -2.5728412 | 0          | 1.35E-04   | 0.008 | 316 |
| -0.5684385  | -2.5678065 | 0          | 1.34E-04   | 0.008 | 159 |
| -0.37229487 | -2.567385  | 0          | 1.33E-04   | 0.008 | 227 |
| -0.48055497 | -2.5620897 | 0          | 1.48E-04   | 0.009 | 381 |
| -0.43052664 | -2.5421278 | 0          | 1.47E-04   | 0.009 | 344 |
| -0.42834806 | -2.5406234 | 0          | 1.46E-04   | 0.009 | 190 |
| -0.39512298 | -2.519751  | 0          | 1.74E-04   | 0.011 | 227 |
| -0.47420734 | -2.5003242 | 0          | 2.50E-04   | 0.016 | 228 |
| -0.5375228  | -2.4810598 | 0          | 2.65E-04   | 0.017 | 341 |
| -0.38781524 | -2.477696  | 0          | 2.63E-04   | 0.017 | 229 |
| -0.5791762  | -2.4756749 | 0          | 2.61E-04   | 0.017 | 315 |
| -0.46726334 | -2.469724  | 0          | 2.77E-04   | 0.018 | 206 |
| -0.44917867 | -2.4538732 | 0          | 2.91E-04   | 0.019 | 370 |
| -0.464224   | -2.4388475 | 0          | 3.34E-04   | 0.022 | 213 |
| -0.31004056 | -2.4345953 | 0          | 3.48E-04   | 0.023 | 290 |
| -0.55376405 | -2.4315875 | 0          | 3.62E-04   | 0.024 | 315 |
| -0.535959   | -2.4283621 | 0          | 3.75E-04   | 0.025 | 352 |
| -0.44499835 | -2.4187393 | 0          | 4.30E-04   | 0.029 | 248 |
| -0.54475033 | -2.4099936 | 0          | 4.56E-04   | 0.031 | 288 |
| -0.32482922 | -2.4044287 | 0          | 4.80E-04   | 0.033 | 226 |
| -0.48191667 | -2.3676584 | 0.00369004 | 6.92E-04   | 0.048 | 341 |
| -0.32319355 | -2.353261  | 0          | 7.94E-04   | 0.055 | 352 |
| -0.38150024 | -2.344216  | 0          | 8.61E-04   | 0.06  | 278 |
| -0.54019517 | -2.3369975 | 0          | 9.13E-04   | 0.063 | 188 |
| -0.3904731  | -2.3304675 | 0          | 9.37E-04   | 0.065 | 226 |
| -0.346945   | -2.3082714 | 0          | 0.00106302 | 0.073 | 439 |
| -0.51651907 | -2.306997  | 0          | 0.0010694  | 0.074 | 334 |
| -0.47620696 | -2.2795293 | 0          | 0.00129639 | 0.091 | 381 |
| -0.34131026 | -2.277743  | 0          | 0.00130282 | 0.092 | 449 |
| -0.3533418  | -2.2652898 | 0          | 0.00140475 | 0.098 | 393 |
| -0.489824   | -2.257596  | 0          | 0.00149109 | 0.105 | 384 |
| -0.5335938  | -2.2486086 | 0          | 0.00160588 | 0.113 | 613 |

|             |            |            |            |       |     |
|-------------|------------|------------|------------|-------|-----|
| -0.36734897 | -2.2379856 | 0          | 0.00169009 | 0.12  | 313 |
| -0.43274954 | -2.236695  | 0          | 0.00172313 | 0.123 | 264 |
| -0.34735146 | -2.232198  | 0          | 0.00171299 | 0.123 | 241 |
| -0.410105   | -2.207147  | 0          | 0.00214758 | 0.153 | 325 |
| -0.33994356 | -2.197344  | 0          | 0.00221271 | 0.158 | 215 |
| -0.2879688  | -2.1971614 | 0          | 0.00219992 | 0.158 | 281 |
| -0.4484109  | -2.175158  | 0          | 0.00257557 | 0.181 | 272 |
| -0.4993633  | -2.1734781 | 0          | 0.00257252 | 0.182 | 279 |
| -0.29169032 | -2.1418486 | 0          | 0.00316649 | 0.215 | 370 |
| -0.38932613 | -2.1413453 | 0          | 0.0031486  | 0.215 | 212 |
| -0.27170736 | -2.1284301 | 0          | 0.00340195 | 0.232 | 278 |
| -0.40426606 | -2.1281133 | 0          | 0.00338294 | 0.232 | 352 |
| -0.3086286  | -2.12199   | 0          | 0.0034894  | 0.241 | 242 |
| -0.3722876  | -2.1211317 | 0          | 0.00350524 | 0.243 | 222 |
| -0.47352397 | -2.1128917 | 0          | 0.00374521 | 0.261 | 281 |
| -0.38159293 | -2.11137   | 0          | 0.00377532 | 0.263 | 424 |
| -0.40369758 | -2.085481  | 0          | 0.00441002 | 0.304 | 266 |
| -0.43417466 | -2.0757697 | 0.00357143 | 0.00464721 | 0.32  | 483 |
| -0.35690272 | -2.0726748 | 0          | 0.00473043 | 0.328 | 345 |
| -0.34198233 | -2.0644546 | 0          | 0.00493257 | 0.337 | 222 |
| -0.46177036 | -2.0572793 | 0          | 0.00505157 | 0.345 | 309 |
| -0.41694432 | -2.0410798 | 0          | 0.00560812 | 0.378 | 659 |
| -0.4549736  | -2.0409815 | 0          | 0.0055786  | 0.378 | 352 |
| -0.27714565 | -2.0293384 | 0          | 0.00610387 | 0.413 | 309 |
| -0.47573933 | -2.0127282 | 0          | 0.00666047 | 0.439 | 149 |
| -0.25234753 | -2.0110922 | 0          | 0.00670783 | 0.443 | 442 |
| -0.3882622  | -2.0093997 | 0          | 0.0067765  | 0.449 | 213 |
| -0.36724317 | -2.0072417 | 0          | 0.00681282 | 0.455 | 276 |
| -0.30486834 | -2.001388  | 0          | 0.00704877 | 0.468 | 389 |
| -0.42496052 | -1.9890627 | 0.00328947 | 0.00758778 | 0.495 | 322 |
| -0.34696293 | -1.9847692 | 0          | 0.00776243 | 0.506 | 299 |
| -0.40596658 | -1.9768022 | 0          | 0.00806758 | 0.518 | 226 |
| -0.4513419  | -1.9681239 | 0          | 0.00860515 | 0.542 | 288 |
| -0.45246348 | -1.9503063 | 0.00647249 | 0.00964112 | 0.584 | 173 |
| -0.41264537 | -1.9357626 | 0.00760456 | 0.01053947 | 0.623 | 397 |
| -0.41160798 | -1.9352983 | 0          | 0.01053097 | 0.625 | 572 |
| -0.22284411 | -1.9197899 | 0          | 0.01161983 | 0.665 | 296 |
| -0.25709915 | -1.903551  | 0.00694444 | 0.0128     | 0.703 | 272 |
| -0.25833768 | -1.9028132 | 0.00621118 | 0.01277217 | 0.704 | 196 |
| -0.32003576 | -1.8914973 | 0.00465116 | 0.01367038 | 0.724 | 105 |
| -0.29725975 | -1.8855257 | 0.00483092 | 0.01410103 | 0.736 | 369 |
| -0.36527076 | -1.8784047 | 0.00348432 | 0.01486426 | 0.759 | 338 |

|             |            |            |            |       |     |
|-------------|------------|------------|------------|-------|-----|
| -0.41044548 | -1.8711826 | 0.00355872 | 0.01536027 | 0.769 | 204 |
| -0.4003304  | -1.860663  | 0.0078125  | 0.01621542 | 0.79  | 329 |
| -0.27061582 | -1.8596536 | 0          | 0.01621368 | 0.792 | 296 |
| -0.4207473  | -1.8473424 | 0.01736111 | 0.01709023 | 0.806 | 405 |
| -0.39225757 | -1.8468814 | 0.00732601 | 0.01705159 | 0.806 | 296 |
| -0.37643462 | -1.842603  | 0.00719425 | 0.01736997 | 0.811 | 337 |
| -0.43157592 | -1.8352662 | 0.00662252 | 0.01810015 | 0.824 | 354 |
| -0.2543114  | -1.8346406 | 0          | 0.01806937 | 0.824 | 241 |
| -0.38697416 | -1.8169334 | 0.01365188 | 0.02006105 | 0.85  | 516 |
| -0.41190672 | -1.8093214 | 0.00701754 | 0.02097214 | 0.863 | 227 |
| -0.41342962 | -1.8079753 | 0.00986842 | 0.02102831 | 0.866 | 430 |
| -0.40762767 | -1.7984787 | 0.03020134 | 0.0224255  | 0.886 | 229 |
| -0.26869795 | -1.792576  | 0.01546392 | 0.02312193 | 0.889 | 191 |
| -0.4024756  | -1.778907  | 0.02295082 | 0.02490201 | 0.91  | 623 |
| -0.34734225 | -1.7702683 | 0.02362205 | 0.02591953 | 0.92  | 246 |
| -0.23381837 | -1.767238  | 0          | 0.0261384  | 0.923 | 227 |
| -0.19512568 | -1.765749  | 0          | 0.02619784 | 0.925 | 359 |
| -0.4007837  | -1.748603  | 0.02919708 | 0.02860751 | 0.942 | 579 |
| -0.29486907 | -1.735988  | 0.01376147 | 0.03058643 | 0.953 | 268 |
| -0.33427128 | -1.7330734 | 0.00763359 | 0.03091654 | 0.958 | 581 |
| -0.4056052  | -1.7280204 | 0.02       | 0.03165897 | 0.964 | 623 |
| -0.38012403 | -1.7278895 | 0.01532567 | 0.03154232 | 0.964 | 391 |
| -0.25106966 | -1.7195892 | 0.00540541 | 0.03314532 | 0.967 | 366 |
| -0.30264592 | -1.6891432 | 0.01492537 | 0.03965982 | 0.982 | 390 |
| -0.28792801 | -1.6850597 | 0.03305785 | 0.04027985 | 0.983 | 430 |
| -0.35501567 | -1.6836296 | 0.04526749 | 0.04041991 | 0.983 | 843 |
| -0.38673687 | -1.6809093 | 0.02105263 | 0.04100279 | 0.984 | 645 |
| -0.38428083 | -1.6784855 | 0.02439024 | 0.04140906 | 0.985 | 691 |
| -0.25492948 | -1.6655815 | 0.0201005  | 0.04456601 | 0.989 | 629 |
| -0.25188893 | -1.6632218 | 0.00502513 | 0.04486501 | 0.99  | 285 |
| -0.29318148 | -1.6612024 | 0.03585658 | 0.04525548 | 0.99  | 840 |
| -0.2594377  | -1.6510729 | 0.02304148 | 0.04773143 | 0.991 | 502 |
| -0.37591162 | -1.6493454 | 0.04262295 | 0.0480119  | 0.991 | 381 |
| -0.24195135 | -1.6432958 | 0.01075269 | 0.0492814  | 0.993 | 807 |
| -0.2276976  | -1.6405338 | 0.00543478 | 0.04975681 | 0.995 | 416 |
| -0.26735145 | -1.6404912 | 0.01376147 | 0.04955372 | 0.995 | 154 |
| -0.36324587 | -1.6335783 | 0.034375   | 0.05138935 | 0.995 | 390 |
| -0.2414709  | -1.6208504 | 0.02654867 | 0.05472044 | 0.995 | 387 |
| -0.32187003 | -1.6116161 | 0.03370787 | 0.05738965 | 0.997 | 715 |
| -0.34701863 | -1.5859257 | 0.04285714 | 0.06571155 | 0.998 | 334 |
| -0.2941444  | -1.5839518 | 0.03418804 | 0.06615464 | 0.998 | 345 |
| -0.3733964  | -1.5833902 | 0.05035971 | 0.0660541  | 0.998 | 494 |

|             |            |            |            |   |     |
|-------------|------------|------------|------------|---|-----|
| -0.3521302  | -1.5675557 | 0.05426357 | 0.07157174 | 1 | 336 |
| -0.2847674  | -1.5611048 | 0.02666667 | 0.07369284 | 1 | 813 |
| -0.20337099 | -1.5584608 | 0.01960784 | 0.07421524 | 1 | 903 |
| -0.24868622 | -1.5476454 | 0.05       | 0.07854122 | 1 | 227 |
| -0.22318858 | -1.5416697 | 0.02777778 | 0.08102839 | 1 | 269 |
| -0.32922894 | -1.5401672 | 0.06329114 | 0.08133636 | 1 | 445 |
| -0.3591627  | -1.536597  | 0.04861111 | 0.08247378 | 1 | 333 |
| -0.3288962  | -1.5332267 | 0.04626335 | 0.08358792 | 1 | 610 |
| -0.35649315 | -1.5329967 | 0.06920415 | 0.08344175 | 1 | 535 |
| -0.28846774 | -1.5328009 | 0.0562249  | 0.08320568 | 1 | 750 |
| -0.21383694 | -1.5325886 | 0.04046243 | 0.08303344 | 1 | 444 |
| -0.3388038  | -1.5222245 | 0.08       | 0.08698715 | 1 | 584 |
| -0.28040156 | -1.5158559 | 0.0513834  | 0.08962405 | 1 | 204 |
| -0.3375601  | -1.5131007 | 0.04964539 | 0.09070516 | 1 | 292 |
| -0.25823784 | -1.5123124 | 0.04910714 | 0.09070098 | 1 | 345 |
| -0.2174607  | -1.5014633 | 0.04861111 | 0.09510785 | 1 | 301 |
| -0.32056296 | -1.4694825 | 0.07590759 | 0.11117394 | 1 | 886 |
| -0.3129364  | -1.4646825 | 0.06737588 | 0.11348334 | 1 | 336 |
| -0.1750154  | -1.4545554 | 0.04807692 | 0.11877344 | 1 | 258 |
| -0.33106646 | -1.4530958 | 0.08910891 | 0.11922215 | 1 | 665 |
| -0.3286385  | -1.4435214 | 0.08921933 | 0.12431046 | 1 | 876 |
| -0.20949052 | -1.4370724 | 0.0621118  | 0.12809049 | 1 | 384 |
| -0.23723389 | -1.4354948 | 0.05789474 | 0.1285525  | 1 | 332 |
| -0.3106041  | -1.4178503 | 0.0866426  | 0.14019392 | 1 | 217 |
| -0.2266467  | -1.4152093 | 0.06341463 | 0.14158866 | 1 | 341 |
| -0.24388167 | -1.4084337 | 0.05371901 | 0.14578755 | 1 | 210 |
| -0.27237514 | -1.407471  | 0.09128631 | 0.14594033 | 1 | 439 |
| -0.3337447  | -1.4036176 | 0.10596027 | 0.14795095 | 1 | 546 |
| -0.27170867 | -1.4032304 | 0.08733624 | 0.1476254  | 1 | 210 |
| -0.24753399 | -1.3999021 | 0.08547009 | 0.14952497 | 1 | 180 |
| -0.30812111 | -1.3937007 | 0.1270903  | 0.15362236 | 1 | 219 |
| -0.2808502  | -1.387804  | 0.11940298 | 0.15745805 | 1 | 825 |
| -0.24240556 | -1.3850402 | 0.11353712 | 0.15901916 | 1 | 681 |
| -0.312323   | -1.3845707 | 0.0974026  | 0.15885344 | 1 | 401 |
| -0.2047423  | -1.3735789 | 0.09090909 | 0.1667972  | 1 | 86  |
| -0.21078508 | -1.3732369 | 0.06666667 | 0.166529   | 1 | 78  |
| -0.25219303 | -1.3663969 | 0.1399177  | 0.17137064 | 1 | 321 |
| -0.30562326 | -1.3588778 | 0.09060403 | 0.17688286 | 1 | 79  |
| -0.22477387 | -1.3576926 | 0.11940298 | 0.17731757 | 1 | 434 |
| -0.27866897 | -1.3508275 | 0.13780919 | 0.18209621 | 1 | 232 |
| -0.21686845 | -1.346079  | 0.12       | 0.18564674 | 1 | 239 |
| -0.17306504 | -1.3412133 | 0.06578948 | 0.18892588 | 1 | 395 |

|             |            |            |            |   |      |
|-------------|------------|------------|------------|---|------|
| -0.27786732 | -1.335148  | 0.1380597  | 0.19404079 | 1 | 736  |
| -0.25919482 | -1.3341014 | 0.12121213 | 0.1941588  | 1 | 71   |
| -0.2905895  | -1.3276128 | 0.14661655 | 0.19961804 | 1 | 179  |
| -0.2254961  | -1.3259267 | 0.11814346 | 0.20052275 | 1 | 257  |
| -0.22744903 | -1.3250389 | 0.12236287 | 0.20067872 | 1 | 384  |
| -0.26686907 | -1.3214595 | 0.11808118 | 0.20326568 | 1 | 273  |
| -0.27267444 | -1.3088365 | 0.13261649 | 0.21449901 | 1 | 358  |
| -0.26459947 | -1.3062307 | 0.14785992 | 0.21608959 | 1 | 625  |
| -0.20758237 | -1.3013933 | 0.13513513 | 0.22007929 | 1 | 750  |
| -0.2831984  | -1.3013395 | 0.17100371 | 0.21941209 | 1 | 822  |
| -0.15572225 | -1.2998966 | 0.09615385 | 0.22013715 | 1 | 699  |
| -0.24655266 | -1.2991042 | 0.13779527 | 0.22018732 | 1 | 306  |
| -0.30092964 | -1.2964977 | 0.15181518 | 0.22190231 | 1 | 559  |
| -0.2439326  | -1.2929703 | 0.16605166 | 0.22474201 | 1 | 407  |
| -0.18382835 | -1.2900633 | 0.11801242 | 0.22689612 | 1 | 321  |
| -0.21792851 | -1.2870787 | 0.1509434  | 0.22930078 | 1 | 606  |
| -0.259838   | -1.2868707 | 0.15294118 | 0.22870797 | 1 | 200  |
| -0.25776717 | -1.282617  | 0.1696113  | 0.23244141 | 1 | 108  |
| -0.23959625 | -1.2806284 | 0.14220184 | 0.23346367 | 1 | 900  |
| -0.29515937 | -1.2729602 | 0.14193548 | 0.24060841 | 1 | 136  |
| -0.16148011 | -1.2631595 | 0.09333333 | 0.2510655  | 1 | 316  |
| -0.25692028 | -1.2536004 | 0.15936255 | 0.2604995  | 1 | 116  |
| -0.2364558  | -1.2375044 | 0.20384616 | 0.2783484  | 1 | 364  |
| -0.19397996 | -1.2371193 | 0.16759777 | 0.2779484  | 1 | 288  |
| -0.15221602 | -1.2367392 | 0.14393939 | 0.2775688  | 1 | 278  |
| -0.24626711 | -1.2357907 | 0.18478261 | 0.27782524 | 1 | 161  |
| -0.29029602 | -1.2353449 | 0.20979021 | 0.2774744  | 1 | 582  |
| -0.2675868  | -1.2306746 | 0.20422535 | 0.28227866 | 1 | 706  |
| -0.24325487 | -1.2229507 | 0.19928825 | 0.29065663 | 1 | 321  |
| -0.2194899  | -1.2227979 | 0.1826484  | 0.28988597 | 1 | 357  |
| -0.26723257 | -1.2223332 | 0.20588236 | 0.289557   | 1 | 706  |
| -0.23094136 | -1.2128555 | 0.234375   | 0.30011    | 1 | 333  |
| -0.25246665 | -1.2125062 | 0.19787987 | 0.29964593 | 1 | 731  |
| -0.21053214 | -1.2073272 | 0.22881356 | 0.30505323 | 1 | 351  |
| -0.26389468 | -1.1958773 | 0.20072992 | 0.31863704 | 1 | 694  |
| -0.25151113 | -1.1887773 | 0.225      | 0.32724807 | 1 | 166  |
| -0.16731562 | -1.1850625 | 0.2366864  | 0.33138648 | 1 | 164  |
| -0.172507   | -1.1843262 | 0.24598931 | 0.3315072  | 1 | 301  |
| -0.17466678 | -1.1789    | 0.23557693 | 0.3382343  | 1 | 440  |
| -0.18264413 | -1.1735989 | 0.2254902  | 0.34434596 | 1 | 297  |
| -0.22301024 | -1.1695409 | 0.23868313 | 0.34901872 | 1 | 1013 |
| -0.12845638 | -1.158744  | 0.15492958 | 0.3635423  | 1 | 346  |



|             |            |            |            |   |      |
|-------------|------------|------------|------------|---|------|
| -0.2513614  | -1.1587026 | 0.27941176 | 0.36253238 | 1 | 572  |
| -0.22631083 | -1.1549921 | 0.26335877 | 0.36656544 | 1 | 149  |
| -0.15369156 | -1.154646  | 0.22222222 | 0.36597636 | 1 | 298  |
| -0.27381122 | -1.1439754 | 0.26245847 | 0.3800387  | 1 | 645  |
| -0.2317499  | -1.1419334 | 0.2781955  | 0.38193646 | 1 | 70   |
| -0.14423053 | -1.1419019 | 0.23015873 | 0.38088492 | 1 | 431  |
| -0.2543036  | -1.1416215 | 0.25249168 | 0.38017994 | 1 | 971  |
| -0.18173334 | -1.1385868 | 0.29319373 | 0.383493   | 1 | 906  |
| -0.24240515 | -1.1355042 | 0.31325302 | 0.3870575  | 1 | 317  |
| -0.25334883 | -1.134526  | 0.29310346 | 0.387303   | 1 | 870  |
| -0.15399833 | -1.1304784 | 0.28402367 | 0.39226565 | 1 | 339  |
| -0.22304267 | -1.1296878 | 0.27137548 | 0.39221758 | 1 | 790  |
| -0.24383445 | -1.1284714 | 0.307947   | 0.3929267  | 1 | 342  |
| -0.26331353 | -1.1235495 | 0.2929293  | 0.3994286  | 1 | 840  |
| -0.13708887 | -1.1079923 | 0.26890758 | 0.42286497 | 1 | 341  |
| -0.25339648 | -1.1026211 | 0.31205675 | 0.4301848  | 1 | 233  |
| -0.23531449 | -1.0982895 | 0.3003663  | 0.43603477 | 1 | 190  |
| -0.23935743 | -1.0971843 | 0.32740214 | 0.4367768  | 1 | 495  |
| -0.15170634 | -1.0968249 | 0.3478261  | 0.43605793 | 1 | 268  |
| -0.20945619 | -1.0967185 | 0.33466136 | 0.43504152 | 1 | 243  |
| -0.22140993 | -1.0946548 | 0.3649635  | 0.43701276 | 1 | 625  |
| -0.22206353 | -1.0940531 | 0.34082398 | 0.436938   | 1 | 89   |
| -0.18262796 | -1.0930899 | 0.3478261  | 0.43726277 | 1 | 381  |
| -0.23529762 | -1.0895461 | 0.3494424  | 0.44147688 | 1 | 112  |
| -0.1731282  | -1.0885178 | 0.35678393 | 0.44185668 | 1 | 828  |
| -0.17710824 | -1.0863112 | 0.34170854 | 0.44431657 | 1 | 74   |
| -0.23226047 | -1.080431  | 0.34385964 | 0.45295697 | 1 | 428  |
| -0.13669655 | -1.0735602 | 0.33898306 | 0.4631654  | 1 | 903  |
| -0.19945265 | -1.0728885 | 0.3392857  | 0.46282324 | 1 | 610  |
| -0.22466269 | -1.0667112 | 0.375      | 0.47205698 | 1 | 885  |
| -0.214772   | -1.0588766 | 0.34812286 | 0.48421544 | 1 | 47   |
| -0.14108987 | -1.0578989 | 0.39285713 | 0.48468244 | 1 | 233  |
| -0.24898472 | -1.0563674 | 0.4025559  | 0.48614433 | 1 | 242  |
| -0.17439096 | -1.0549545 | 0.38164252 | 0.4873906  | 1 | 601  |
| -0.22551638 | -1.0540493 | 0.3923611  | 0.48746815 | 1 | 110  |
| -0.23375115 | -1.0439961 | 0.39666668 | 0.50361437 | 1 | 344  |
| -0.20407492 | -1.0409939 | 0.4015748  | 0.5075397  | 1 | 706  |
| -0.16764748 | -1.0387824 | 0.41869918 | 0.5098369  | 1 | 1035 |
| -0.16071805 | -1.0352889 | 0.4063927  | 0.5146432  | 1 | 280  |
| -0.19617845 | -1.0330831 | 0.4140625  | 0.5171548  | 1 | 164  |
| -0.15001148 | -1.0300667 | 0.41104296 | 0.52089614 | 1 | 85   |
| -0.19887197 | -1.028773  | 0.40942028 | 0.5217934  | 1 | 961  |

|              |            |            |            |   |      |
|--------------|------------|------------|------------|---|------|
| -0.20486657  | -1.0241177 | 0.4074074  | 0.52909374 | 1 | 1035 |
| -0.17948237  | -1.0165614 | 0.39910313 | 0.54151124 | 1 | 685  |
| -0.17028436  | -1.0146984 | 0.43396226 | 0.54314554 | 1 | 156  |
| -0.1942931   | -1.009935  | 0.4183267  | 0.55013376 | 1 | 55   |
| -0.2112709   | -1.0086523 | 0.44863012 | 0.55067796 | 1 | 427  |
| -0.20835376  | -1.008458  | 0.4181818  | 0.54954624 | 1 | 274  |
| -0.20141312  | -1.0067794 | 0.41935483 | 0.55100685 | 1 | 319  |
| -0.21856353  | -0.9951944 | 0.44787645 | 0.5701133  | 1 | 701  |
| -0.15839076  | -0.9949477 | 0.46268657 | 0.56907135 | 1 | 212  |
| -0.23046875  | -0.9890701 | 0.45079365 | 0.57832605 | 1 | 1001 |
| -0.23425964  | -0.9820617 | 0.46180555 | 0.5898808  | 1 | 550  |
| -0.23055157  | -0.982044  | 0.45794392 | 0.5884062  | 1 | 116  |
| -0.2002581   | -0.9811076 | 0.46263346 | 0.5885832  | 1 | 127  |
| -0.20729429  | -0.9784711 | 0.5016949  | 0.5919273  | 1 | 121  |
| -0.14782122  | -0.9738435 | 0.44270834 | 0.5986205  | 1 | 219  |
| -0.19429448  | -0.9654614 | 0.5246479  | 0.61236817 | 1 | 340  |
| -0.1434005   | -0.9622685 | 0.5543478  | 0.6168803  | 1 | 926  |
| -0.20673454  | -0.9618318 | 0.50342464 | 0.6161126  | 1 | 1032 |
| -0.1675021   | -0.9600124 | 0.47679326 | 0.61811864 | 1 | 591  |
| -0.221875    | -0.9548712 | 0.5339806  | 0.62592864 | 1 | 1012 |
| -0.16514215  | -0.9543035 | 0.50236964 | 0.6254151  | 1 | 423  |
| -0.13868761  | -0.9533908 | 0.55757576 | 0.625366   | 1 | 185  |
| -0.21410461  | -0.9508623 | 0.5104167  | 0.6288544  | 1 | 885  |
| -0.1932942   | -0.9482338 | 0.48134327 | 0.6319656  | 1 | 140  |
| -0.15233293  | -0.9479348 | 0.5177665  | 0.6310131  | 1 | 889  |
| -0.21039775  | -0.9441749 | 0.53       | 0.63611925 | 1 | 274  |
| -0.16928174  | -0.9418256 | 0.53932583 | 0.63884175 | 1 | 288  |
| -0.18593888  | -0.9393019 | 0.5207547  | 0.6419982  | 1 | 104  |
| -0.15032186  | -0.9373423 | 0.55813956 | 0.6440283  | 1 | 885  |
| -0.22209625  | -0.9371988 | 0.54340833 | 0.6426612  | 1 | 862  |
| -0.20735525  | -0.9341493 | 0.5273973  | 0.6466984  | 1 | 1031 |
| -0.19901462  | -0.9231246 | 0.5471698  | 0.6652492  | 1 | 426  |
| -0.20934068  | -0.9177684 | 0.5400697  | 0.67316127 | 1 | 100  |
| -0.17868823  | -0.8965953 | 0.60215056 | 0.71009123 | 1 | 100  |
| -0.20625     | -0.8904643 | 0.60535115 | 0.71942854 | 1 | 1032 |
| -0.19995314  | -0.8775092 | 0.6181818  | 0.74050796 | 1 | 108  |
| -0.110600285 | -0.8748106 | 0.7218045  | 0.7434437  | 1 | 290  |
| -0.17334537  | -0.8732152 | 0.6277372  | 0.74453795 | 1 | 296  |
| -0.1915559   | -0.8722412 | 0.6099291  | 0.74439865 | 1 | 1051 |
| -0.17158748  | -0.8691967 | 0.6415094  | 0.7480747  | 1 | 169  |
| -0.17045957  | -0.8646365 | 0.66431093 | 0.7541499  | 1 | 761  |
| -0.19346668  | -0.8569619 | 0.63176894 | 0.7661072  | 1 | 341  |

|              |            |            |            |   |      |
|--------------|------------|------------|------------|---|------|
| -0.10542003  | -0.8544876 | 0.75438595 | 0.76866007 | 1 | 318  |
| -0.15136218  | -0.8498603 | 0.69491524 | 0.774765   | 1 | 840  |
| -0.14532064  | -0.8468173 | 0.6937799  | 0.7783185  | 1 | 315  |
| -0.18772937  | -0.8380649 | 0.70068026 | 0.7909506  | 1 | 77   |
| -0.1392405   | -0.835814  | 0.7118644  | 0.7927666  | 1 | 1120 |
| -0.12266115  | -0.8210057 | 0.69417477 | 0.8155345  | 1 | 327  |
| -0.19102469  | -0.8169456 | 0.7294521  | 0.82042634 | 1 | 108  |
| -0.15445232  | -0.8101936 | 0.7        | 0.8298533  | 1 | 1100 |
| -0.17435955  | -0.8068913 | 0.74912894 | 0.83320206 | 1 | 817  |
| -0.18123564  | -0.8067846 | 0.7007042  | 0.8313873  | 1 | 943  |
| -0.13690181  | -0.8064665 | 0.7669903  | 0.8300006  | 1 | 146  |
| -0.17373304  | -0.8064377 | 0.7517007  | 0.8281099  | 1 | 629  |
| -0.17222235  | -0.8029012 | 0.71666664 | 0.8317293  | 1 | 128  |
| -0.11593417  | -0.8008277 | 0.8089172  | 0.83295715 | 1 | 205  |
| -0.13877168  | -0.8002327 | 0.7837838  | 0.8318455  | 1 | 238  |
| -0.15690163  | -0.7955818 | 0.754717   | 0.8370058  | 1 | 69   |
| -0.16214865  | -0.7856723 | 0.7516779  | 0.8501625  | 1 | 41   |
| -0.18137412  | -0.7813591 | 0.75886524 | 0.8546917  | 1 | 896  |
| -0.1414397   | -0.7808458 | 0.7875     | 0.8534853  | 1 | 289  |
| -0.17231254  | -0.778665  | 0.7692308  | 0.85498977 | 1 | 843  |
| -0.18129729  | -0.7781809 | 0.7250859  | 0.8537341  | 1 | 202  |
| -0.17101431  | -0.7779149 | 0.76428574 | 0.8521395  | 1 | 276  |
| -0.16666748  | -0.7730454 | 0.770073   | 0.85733944 | 1 | 930  |
| -0.13099484  | -0.7714554 | 0.7991266  | 0.85766524 | 1 | 278  |
| -0.14200668  | -0.7590941 | 0.7941176  | 0.8727818  | 1 | 136  |
| -0.15297653  | -0.7585535 | 0.78174603 | 0.8715477  | 1 | 232  |
| -0.1055687   | -0.752095  | 0.84153    | 0.87848216 | 1 | 665  |
| -0.15969543  | -0.7470037 | 0.81782943 | 0.8832839  | 1 | 111  |
| -0.13821164  | -0.739293  | 0.8464567  | 0.8920788  | 1 | 930  |
| -0.11776245  | -0.7373456 | 0.86255926 | 0.8924489  | 1 | 70   |
| -0.1022004   | -0.7345449 | 0.9019608  | 0.89420694 | 1 | 801  |
| -0.111677445 | -0.7296513 | 0.8640777  | 0.89834535 | 1 | 451  |
| -0.17194916  | -0.7260674 | 0.8476821  | 0.9008507  | 1 | 921  |
| -0.1228221   | -0.7220195 | 0.84018266 | 0.90378124 | 1 | 945  |
| -0.12589073  | -0.7171446 | 0.8370044  | 0.90769994 | 1 | 1137 |
| -0.15282083  | -0.7131953 | 0.8171206  | 0.91035366 | 1 | 232  |
| -0.158751    | -0.7068554 | 0.83505154 | 0.9160461  | 1 | 648  |
| -0.15661708  | -0.7051472 | 0.8561151  | 0.9160558  | 1 | 1096 |
| -0.120172195 | -0.7024388 | 0.8754864  | 0.91709894 | 1 | 696  |
| -0.15257299  | -0.6922519 | 0.85714287 | 0.9269497  | 1 | 409  |
| -0.11676422  | -0.6918559 | 0.90869564 | 0.9253386  | 1 | 597  |
| -0.14050236  | -0.6866227 | 0.875      | 0.9288421  | 1 | 1117 |

|              |            |            |            |   |      |
|--------------|------------|------------|------------|---|------|
| -0.1335644   | -0.6828144 | 0.87265915 | 0.9307195  | 1 | 165  |
| -0.095703304 | -0.6777504 | 0.9162011  | 0.9338612  | 1 | 81   |
| -0.1207677   | -0.6765422 | 0.9141631  | 0.9331423  | 1 | 206  |
| -0.08740736  | -0.6664013 | 0.9097744  | 0.9411414  | 1 | 466  |
| -0.12535012  | -0.6636455 | 0.9080882  | 0.9418323  | 1 | 912  |
| -0.103404894 | -0.624228  | 0.94827586 | 0.9718773  | 1 | 362  |
| -0.13985623  | -0.6231034 | 0.92057765 | 0.97047627 | 1 | 135  |
| -0.11074     | -0.6202955 | 0.93073595 | 0.9704818  | 1 | 1014 |
| -0.12426377  | -0.6104966 | 0.9468085  | 0.974722   | 1 | 625  |
| -0.11969735  | -0.6071038 | 0.94385964 | 0.9748184  | 1 | 105  |
| -0.10079365  | -0.5977536 | 0.96581197 | 0.9781122  | 1 | 1169 |
| -0.10944882  | -0.5895317 | 0.9705882  | 0.98048604 | 1 | 1157 |
| -0.1250222   | -0.5705349 | 0.9694657  | 0.9873937  | 1 | 1001 |
| -0.12215504  | -0.5523902 | 0.9583333  | 0.99247384 | 1 | 889  |
| -0.07804977  | -0.5506537 | 0.98029554 | 0.99105453 | 1 | 104  |
| -0.09118238  | -0.547249  | 0.97512436 | 0.99011403 | 1 | 352  |
| -0.082063    | -0.5373887 | 0.973262   | 0.99125296 | 1 | 242  |
| -0.1164915   | -0.5358403 | 0.98233217 | 0.9896436  | 1 | 898  |
| -0.11859805  | -0.5132123 | 0.98734176 | 0.99366254 | 1 | 1004 |
| -0.1171875   | -0.5077801 | 0.99671054 | 0.9927493  | 1 | 1146 |
| -0.1055082   | -0.4735509 | 1          | 0.99592185 | 1 | 866  |

## LEADING EDGE

tags=89%, list=24%, signal=113%  
tags=74%, list=24%, signal=91%  
tags=91%, list=18%, signal=108%  
tags=93%, list=25%, signal=120%  
tags=94%, list=26%, signal=122%  
tags=79%, list=18%, signal=94%  
tags=90%, list=18%, signal=107%  
tags=78%, list=16%, signal=91%  
tags=88%, list=30%, signal=119%  
tags=80%, list=24%, signal=101%  
tags=78%, list=25%, signal=99%  
tags=70%, list=21%, signal=82%  
tags=94%, list=24%, signal=121%  
tags=74%, list=18%, signal=87%  
tags=79%, list=24%, signal=99%  
tags=77%, list=18%, signal=92%  
tags=83%, list=20%, signal=102%  
tags=82%, list=19%, signal=99%  
tags=75%, list=30%, signal=96%  
tags=78%, list=25%, signal=101%  
tags=84%, list=24%, signal=107%  
tags=70%, list=24%, signal=88%  
tags=83%, list=20%, signal=102%  
tags=73%, list=18%, signal=86%  
tags=68%, list=26%, signal=86%  
tags=86%, list=20%, signal=105%  
tags=95%, list=18%, signal=113%  
tags=92%, list=22%, signal=117%  
tags=87%, list=22%, signal=108%  
tags=76%, list=18%, signal=90%  
tags=70%, list=24%, signal=87%  
tags=86%, list=24%, signal=110%  
tags=97%, list=30%, signal=135%  
tags=78%, list=16%, signal=92%  
tags=65%, list=24%, signal=81%  
tags=95%, list=21%, signal=118%  
tags=94%, list=17%, signal=112%  
tags=85%, list=22%, signal=106%  
tags=70%, list=24%, signal=87%  
tags=74%, list=21%, signal=92%  
tags=67%, list=20%, signal=81%

tags=70%, list=26%, signal=89%  
tags=74%, list=18%, signal=88%  
tags=81%, list=16%, signal=95%  
tags=77%, list=28%, signal=103%  
tags=54%, list=22%, signal=59%  
tags=84%, list=18%, signal=101%  
tags=94%, list=22%, signal=120%  
tags=70%, list=24%, signal=89%  
tags=77%, list=19%, signal=94%  
tags=89%, list=26%, signal=117%  
tags=81%, list=24%, signal=104%  
tags=70%, list=28%, signal=92%  
tags=71%, list=17%, signal=84%  
tags=88%, list=24%, signal=114%  
tags=86%, list=24%, signal=111%  
tags=91%, list=26%, signal=120%  
tags=93%, list=17%, signal=112%  
tags=80%, list=17%, signal=94%  
tags=85%, list=26%, signal=113%  
tags=83%, list=34%, signal=121%  
tags=80%, list=20%, signal=98%  
tags=62%, list=24%, signal=76%  
tags=93%, list=22%, signal=118%  
tags=83%, list=19%, signal=102%  
tags=94%, list=24%, signal=123%  
tags=66%, list=23%, signal=81%  
tags=93%, list=18%, signal=112%  
tags=76%, list=30%, signal=103%  
tags=90%, list=29%, signal=126%  
tags=90%, list=24%, signal=118%  
tags=54%, list=15%, signal=61%  
tags=69%, list=19%, signal=83%  
tags=84%, list=24%, signal=109%  
tags=67%, list=26%, signal=87%  
tags=100%, list=35%, signal=151%  
tags=80%, list=20%, signal=98%  
tags=80%, list=18%, signal=97%  
tags=68%, list=26%, signal=88%  
tags=86%, list=23%, signal=109%  
tags=100%, list=24%, signal=130%  
tags=94%, list=23%, signal=121%  
tags=82%, list=18%, signal=99%

tags=77%, list=18%, signal=92%  
tags=53%, list=24%, signal=62%  
tags=77%, list=28%, signal=104%  
tags=65%, list=26%, signal=85%  
tags=81%, list=21%, signal=101%  
tags=88%, list=31%, signal=124%  
tags=86%, list=25%, signal=112%  
tags=93%, list=24%, signal=122%  
tags=54%, list=23%, signal=65%  
tags=94%, list=29%, signal=131%  
tags=81%, list=31%, signal=114%  
tags=60%, list=19%, signal=72%  
tags=84%, list=22%, signal=106%  
tags=58%, list=17%, signal=67%  
tags=61%, list=16%, signal=71%  
tags=70%, list=21%, signal=87%  
tags=64%, list=25%, signal=81%  
tags=81%, list=26%, signal=108%  
tags=95%, list=34%, signal=141%  
tags=62%, list=28%, signal=81%  
tags=68%, list=24%, signal=87%  
tags=80%, list=18%, signal=96%  
tags=94%, list=29%, signal=131%  
tags=87%, list=22%, signal=109%  
tags=94%, list=28%, signal=130%  
tags=82%, list=38%, signal=127%  
tags=92%, list=45%, signal=160%  
tags=67%, list=24%, signal=86%  
tags=68%, list=20%, signal=84%  
tags=60%, list=22%, signal=74%  
tags=81%, list=28%, signal=110%  
tags=67%, list=19%, signal=81%  
tags=75%, list=31%, signal=105%  
tags=53%, list=18%, signal=63%  
tags=47%, list=21%, signal=53%  
tags=87%, list=35%, signal=130%  
tags=63%, list=27%, signal=84%  
tags=64%, list=23%, signal=81%  
tags=61%, list=14%, signal=70%  
tags=48%, list=25%, signal=57%  
tags=40%, list=17%, signal=45%  
tags=60%, list=17%, signal=70%

tags=63%, list=31%, signal=85%  
tags=57%, list=23%, signal=70%  
tags=68%, list=28%, signal=91%  
tags=60%, list=18%, signal=71%  
tags=81%, list=26%, signal=109%  
tags=69%, list=21%, signal=86%  
tags=67%, list=21%, signal=83%  
tags=63%, list=20%, signal=77%  
tags=88%, list=34%, signal=130%  
tags=76%, list=26%, signal=102%  
tags=51%, list=24%, signal=62%  
tags=63%, list=12%, signal=70%  
tags=47%, list=18%, signal=55%  
tags=76%, list=29%, signal=106%  
tags=65%, list=27%, signal=86%  
tags=43%, list=15%, signal=49%  
tags=50%, list=18%, signal=59%  
tags=56%, list=18%, signal=67%  
tags=78%, list=26%, signal=104%  
tags=52%, list=18%, signal=62%  
tags=80%, list=24%, signal=104%  
tags=56%, list=16%, signal=65%  
tags=76%, list=29%, signal=104%  
tags=56%, list=16%, signal=66%  
tags=52%, list=22%, signal=63%  
tags=80%, list=24%, signal=104%  
tags=75%, list=27%, signal=102%  
tags=58%, list=19%, signal=70%  
tags=69%, list=22%, signal=87%  
tags=43%, list=17%, signal=49%  
tags=71%, list=26%, signal=95%  
tags=54%, list=27%, signal=70%  
tags=53%, list=21%, signal=65%  
tags=53%, list=15%, signal=62%  
tags=54%, list=17%, signal=64%  
tags=72%, list=34%, signal=105%  
tags=76%, list=26%, signal=102%  
tags=79%, list=29%, signal=110%  
tags=72%, list=35%, signal=106%  
tags=66%, list=30%, signal=92%  
tags=72%, list=30%, signal=101%  
tags=100%, list=47%, signal=188%



tags=59%, list=24%, signal=76%  
tags=50%, list=20%, signal=62%  
tags=45%, list=19%, signal=53%  
tags=64%, list=25%, signal=84%  
tags=44%, list=17%, signal=51%  
tags=46%, list=22%, signal=55%  
tags=65%, list=21%, signal=81%  
tags=67%, list=22%, signal=84%  
tags=59%, list=29%, signal=79%  
tags=47%, list=16%, signal=55%  
tags=45%, list=21%, signal=53%  
tags=64%, list=27%, signal=86%  
tags=42%, list=19%, signal=50%  
tags=48%, list=17%, signal=57%  
tags=67%, list=22%, signal=84%  
tags=76%, list=33%, signal=110%  
tags=57%, list=21%, signal=70%  
tags=83%, list=37%, signal=131%  
tags=61%, list=27%, signal=81%  
tags=44%, list=17%, signal=52%  
tags=63%, list=24%, signal=81%  
tags=95%, list=51%, signal=190%  
tags=69%, list=27%, signal=93%  
tags=51%, list=24%, signal=63%  
tags=47%, list=12%, signal=52%  
tags=60%, list=34%, signal=85%  
tags=50%, list=16%, signal=59%  
tags=56%, list=21%, signal=69%  
tags=59%, list=30%, signal=82%  
tags=67%, list=25%, signal=87%  
tags=55%, list=23%, signal=70%  
tags=55%, list=17%, signal=65%  
tags=60%, list=22%, signal=76%  
tags=47%, list=13%, signal=53%  
tags=74%, list=31%, signal=105%  
tags=89%, list=44%, signal=158%  
tags=42%, list=23%, signal=50%  
tags=44%, list=21%, signal=52%  
tags=37%, list=15%, signal=42%  
tags=29%, list=8%, signal=31%  
tags=58%, list=28%, signal=79%  
tags=65%, list=26%, signal=87%

tags=44%, list=16%, signal=52%  
tags=56%, list=25%, signal=73%  
tags=44%, list=23%, signal=55%  
tags=80%, list=31%, signal=115%  
tags=61%, list=23%, signal=78%  
tags=57%, list=26%, signal=76%  
tags=67%, list=27%, signal=91%  
tags=37%, list=19%, signal=43%  
tags=83%, list=40%, signal=137%  
tags=53%, list=18%, signal=64%  
tags=75%, list=33%, signal=111%  
tags=56%, list=18%, signal=67%  
tags=34%, list=15%, signal=38%  
tags=93%, list=48%, signal=178%  
tags=48%, list=19%, signal=58%  
tags=33%, list=18%, signal=38%  
tags=46%, list=28%, signal=54%  
tags=88%, list=45%, signal=156%  
tags=47%, list=21%, signal=58%  
tags=83%, list=45%, signal=148%  
tags=93%, list=48%, signal=178%  
tags=67%, list=30%, signal=94%  
tags=53%, list=28%, signal=71%  
tags=61%, list=30%, signal=85%  
tags=69%, list=33%, signal=100%  
tags=100%, list=65%, signal=282%  
tags=94%, list=50%, signal=184%  
tags=94%, list=53%, signal=199%  
tags=80%, list=49%, signal=152%  
tags=41%, list=22%, signal=51%  
tags=97%, list=65%, signal=269%  
tags=71%, list=39%, signal=112%  
tags=69%, list=29%, signal=96%  
tags=92%, list=62%, signal=235%  
tags=56%, list=32%, signal=78%  
tags=30%, list=12%, signal=33%  
tags=71%, list=30%, signal=100%  
tags=57%, list=30%, signal=78%  
tags=91%, list=55%, signal=200%  
tags=59%, list=26%, signal=78%  
tags=50%, list=27%, signal=67%  
tags=80%, list=38%, signal=128%

tags=63%, list=26%, signal=83%  
tags=96%, list=63%, signal=253%  
tags=93%, list=70%, signal=290%  
tags=38%, list=18%, signal=44%  
tags=34%, list=21%, signal=41%  
tags=71%, list=34%, signal=106%  
tags=73%, list=26%, signal=98%  
tags=88%, list=47%, signal=165%  
tags=81%, list=41%, signal=137%  
tags=92%, list=58%, signal=215%  
tags=59%, list=34%, signal=86%  
tags=82%, list=45%, signal=148%  
tags=33%, list=16%, signal=39%  
tags=47%, list=23%, signal=60%  
tags=48%, list=27%, signal=64%  
tags=38%, list=23%, signal=47%  
tags=100%, list=68%, signal=313%  
tags=56%, list=26%, signal=74%  
tags=35%, list=20%, signal=41%  
tags=88%, list=51%, signal=178%  
tags=100%, list=68%, signal=305%  
tags=54%, list=30%, signal=74%  
tags=45%, list=26%, signal=60%  
tags=41%, list=17%, signal=49%  
tags=46%, list=26%, signal=61%  
tags=30%, list=16%, signal=35%  
tags=67%, list=34%, signal=99%  
tags=87%, list=42%, signal=148%  
tags=40%, list=16%, signal=47%  
tags=34%, list=14%, signal=39%  
tags=41%, list=17%, signal=49%  
tags=95%, list=64%, signal=258%  
tags=87%, list=53%, signal=179%  
tags=63%, list=31%, signal=89%  
tags=16%, list=7%, signal=16%  
tags=20%, list=6%, signal=20%  
tags=46%, list=25%, signal=60%  
tags=27%, list=6%, signal=28%  
tags=64%, list=34%, signal=93%  
tags=45%, list=18%, signal=54%  
tags=32%, list=18%, signal=38%  
tags=49%, list=31%, signal=66%

tags=90%, list=57%, signal=205%  
tags=22%, list=5%, signal=23%  
tags=41%, list=14%, signal=47%  
tags=35%, list=20%, signal=43%  
tags=55%, list=30%, signal=76%  
tags=45%, list=21%, signal=57%  
tags=55%, list=28%, signal=75%  
tags=81%, list=48%, signal=154%  
tags=84%, list=58%, signal=193%  
tags=94%, list=63%, signal=255%  
tags=78%, list=54%, signal=156%  
tags=46%, list=24%, signal=59%  
tags=80%, list=43%, signal=139%  
tags=58%, list=31%, signal=83%  
tags=41%, list=25%, signal=52%  
tags=75%, list=47%, signal=137%  
tags=33%, list=15%, signal=39%  
tags=24%, list=8%, signal=26%  
tags=96%, list=69%, signal=309%  
tags=33%, list=11%, signal=37%  
tags=39%, list=24%, signal=48%  
tags=27%, list=9%, signal=29%  
tags=56%, list=28%, signal=76%  
tags=38%, list=22%, signal=47%  
tags=32%, list=21%, signal=38%  
tags=27%, list=12%, signal=31%  
tags=80%, list=45%, signal=144%  
tags=88%, list=55%, signal=191%  
tags=50%, list=25%, signal=65%  
tags=50%, list=28%, signal=68%  
tags=88%, list=55%, signal=191%  
tags=48%, list=26%, signal=63%  
tags=89%, list=56%, signal=202%  
tags=48%, list=27%, signal=65%  
tags=88%, list=54%, signal=188%  
tags=28%, list=13%, signal=31%  
tags=21%, list=13%, signal=23%  
tags=40%, list=23%, signal=51%  
tags=58%, list=34%, signal=84%  
tags=41%, list=23%, signal=52%  
tags=100%, list=78%, signal=450%  
tags=35%, list=27%, signal=43%

tags=79%, list=44%, signal=139%  
tags=29%, list=12%, signal=32%  
tags=37%, list=23%, signal=45%  
tags=87%, list=50%, signal=171%  
tags=20%, list=5%, signal=21%  
tags=49%, list=33%, signal=68%  
tags=100%, list=75%, signal=394%  
tags=92%, list=70%, signal=298%  
tags=50%, list=24%, signal=65%  
tags=94%, list=67%, signal=283%  
tags=39%, list=26%, signal=50%  
tags=91%, list=61%, signal=230%  
tags=56%, list=26%, signal=74%  
tags=93%, list=65%, signal=263%  
tags=38%, list=26%, signal=48%  
tags=33%, list=18%, signal=40%  
tags=33%, list=15%, signal=39%  
tags=71%, list=38%, signal=113%  
tags=32%, list=21%, signal=38%  
tags=33%, list=19%, signal=40%  
tags=77%, list=48%, signal=147%  
tags=19%, list=7%, signal=20%  
tags=53%, list=29%, signal=72%  
tags=24%, list=9%, signal=25%  
tags=87%, list=64%, signal=234%  
tags=17%, list=6%, signal=17%  
tags=67%, list=33%, signal=98%  
tags=89%, list=70%, signal=276%  
tags=78%, list=47%, signal=144%  
tags=94%, list=68%, signal=294%  
tags=15%, list=4%, signal=15%  
tags=27%, list=18%, signal=31%  
tags=33%, list=19%, signal=41%  
tags=78%, list=46%, signal=141%  
tags=20%, list=8%, signal=22%  
tags=50%, list=27%, signal=67%  
tags=87%, list=55%, signal=188%  
tags=97%, list=80%, signal=471%  
tags=38%, list=22%, signal=47%  
tags=26%, list=13%, signal=29%  
tags=14%, list=7%, signal=14%  
tags=96%, list=74%, signal=365%

tags=100%, list=80%, signal=490%  
tags=81%, list=53%, signal=168%  
tags=23%, list=12%, signal=25%  
tags=14%, list=4%, signal=14%  
tags=61%, list=33%, signal=90%  
tags=38%, list=21%, signal=48%  
tags=42%, list=25%, signal=55%  
tags=82%, list=54%, signal=177%  
tags=28%, list=16%, signal=32%  
tags=100%, list=77%, signal=435%  
tags=73%, list=42%, signal=126%  
tags=27%, list=9%, signal=29%  
tags=25%, list=10%, signal=27%  
tags=22%, list=9%, signal=24%  
tags=30%, list=17%, signal=34%  
tags=45%, list=26%, signal=60%  
tags=90%, list=72%, signal=304%  
tags=100%, list=80%, signal=486%  
tags=75%, list=46%, signal=135%  
tags=100%, list=78%, signal=452%  
tags=59%, list=33%, signal=86%  
tags=22%, list=14%, signal=24%  
tags=94%, list=68%, signal=292%  
tags=25%, list=11%, signal=28%  
tags=92%, list=69%, signal=285%  
tags=38%, list=21%, signal=47%  
tags=39%, list=22%, signal=49%  
tags=19%, list=8%, signal=20%  
tags=90%, list=68%, signal=275%  
tags=93%, list=67%, signal=276%  
tags=100%, list=80%, signal=484%  
tags=61%, list=33%, signal=90%  
tags=24%, list=8%, signal=25%  
tags=19%, list=8%, signal=20%  
tags=100%, list=80%, signal=487%  
tags=20%, list=8%, signal=22%  
tags=30%, list=22%, signal=37%  
tags=36%, list=23%, signal=46%  
tags=100%, list=81%, signal=524%  
tags=24%, list=13%, signal=27%  
tags=86%, list=59%, signal=206%  
tags=47%, list=26%, signal=63%

tags=33%, list=25%, signal=40%  
tags=87%, list=65%, signal=241%  
tags=35%, list=24%, signal=45%  
tags=19%, list=6%, signal=20%  
tags=100%, list=86%, signal=722%  
tags=33%, list=25%, signal=43%  
tags=20%, list=8%, signal=22%  
tags=100%, list=85%, signal=651%  
tags=89%, list=63%, signal=237%  
tags=94%, list=73%, signal=342%  
tags=19%, list=11%, signal=21%  
tags=78%, list=49%, signal=149%  
tags=22%, list=10%, signal=24%  
tags=22%, list=16%, signal=25%  
tags=28%, list=18%, signal=34%  
tags=14%, list=5%, signal=14%  
tags=11%, list=3%, signal=11%  
tags=93%, list=69%, signal=299%  
tags=35%, list=22%, signal=44%  
tags=89%, list=65%, signal=251%  
tags=27%, list=16%, signal=31%  
tags=35%, list=21%, signal=44%  
tags=94%, list=72%, signal=330%  
tags=35%, list=21%, signal=44%  
tags=15%, list=11%, signal=16%  
tags=27%, list=18%, signal=33%  
tags=72%, list=51%, signal=141%  
tags=17%, list=9%, signal=18%  
tags=92%, list=72%, signal=321%  
tags=10%, list=5%, signal=10%  
tags=84%, list=62%, signal=209%  
tags=58%, list=35%, signal=86%  
tags=93%, list=71%, signal=319%  
tags=90%, list=73%, signal=326%  
tags=100%, list=88%, signal=799%  
tags=28%, list=18%, signal=33%  
tags=81%, list=50%, signal=161%  
tags=100%, list=85%, signal=642%  
tags=77%, list=54%, signal=162%  
tags=56%, list=32%, signal=80%  
tags=71%, list=46%, signal=128%  
tags=100%, list=86%, signal=716%

tags=22%, list=13%, signal=24%  
tags=10%, list=6%, signal=10%  
tags=21%, list=16%, signal=25%  
tags=55%, list=36%, signal=82%  
tags=91%, list=70%, signal=303%  
tags=42%, list=28%, signal=56%  
tags=19%, list=10%, signal=21%  
tags=94%, list=78%, signal=421%  
tags=71%, list=48%, signal=136%  
tags=14%, list=8%, signal=15%  
tags=100%, list=90%, signal=1000%  
tags=100%, list=89%, signal=920%  
tags=94%, list=77%, signal=409%  
tags=89%, list=69%, signal=280%  
tags=11%, list=8%, signal=12%  
tags=37%, list=27%, signal=50%  
tags=24%, list=19%, signal=28%  
tags=89%, list=69%, signal=286%  
tags=93%, list=78%, signal=411%  
tags=100%, list=88%, signal=859%  
tags=88%, list=67%, signal=261%
